# Supplementary material for: Small RNA sequencing identified miR-3180 as a potential prognostic biomarker for Chinese hepatocellular carcinoma patients
Source: Front Genet. 2023 Mar 27;14:1102171. doi: 10.3389/fgene.2023.1102171 (PMC10083302; doi:10.3389/fgene.2023.1102171)
Supplement: Supplementary file 6 [file Table5.XLSX]

## Sheet: Sheet1
					Header line description of worksheet of Table 1
					miRNA	the ID of mature miRNA
					exp_1N	expressiom(TPM) of miRNA of 1# normal sample
					exp_1ca	expressiom(TPM) of miRNA of 1# cancer sample
					exp_10N	expressiom(TPM) of miRNA of 10# normal sample
					exp_10ca	expressiom(TPM) of miRNA of 10# cancer sample
					exp_12N	expressiom(TPM) of miRNA of 12# normal sample
					exp_12ca	expressiom(TPM) of miRNA of 12# cancer sample
					exp_13N	expressiom(TPM) of miRNA of 13# normal sample
					exp_13ca	expressiom(TPM) of miRNA of 13# cancer sample
					exp_14N	expressiom(TPM) of miRNA of 14# normal sample
					exp_14ca	expressiom(TPM) of miRNA of 14# cancer sample
					exp_15N	expressiom(TPM) of miRNA of 15# normal sample
					exp_15ca	expressiom(TPM) of miRNA of 15# cancer sample
					exp_18N	expressiom(TPM) of miRNA of 18# normal sample
					exp_18ca	expressiom(TPM) of miRNA of 18# cancer sample
					exp_19N	expressiom(TPM) of miRNA of 19# normal sample
					exp_19ca	expressiom(TPM) of miRNA of 19# cancer sample
					exp_2N	expressiom(TPM) of miRNA of 2# normal sample
					exp_2ca	expressiom(TPM) of miRNA of 2# cancer sample
					exp_20N	expressiom(TPM) of miRNA of 20# normal sample
					exp_20ca	expressiom(TPM) of miRNA of 20# cancer sample
					exp_22N	expressiom(TPM) of miRNA of 22# normal sample
					exp_22ca	expressiom(TPM) of miRNA of 22# cancer sample
					exp_23N	expressiom(TPM) of miRNA of 23# normal sample
					exp_23ca	expressiom(TPM) of miRNA of 23# cancer sample
					exp_24N	expressiom(TPM) of miRNA of 24# normal sample
					exp_24ca	expressiom(TPM) of miRNA of 24# cancer sample
					exp_25N	expressiom(TPM) of miRNA of 25# normal sample
					exp_25ca	expressiom(TPM) of miRNA of 25# cancer sample
					exp_27N	expressiom(TPM) of miRNA of 27# normal sample
					exp_27ca	expressiom(TPM) of miRNA of 27# cancer sample
					exp_28N	expressiom(TPM) of miRNA of 28# normal sample
					exp_28ca	expressiom(TPM) of miRNA of 28# cancer sample
					exp_29N	expressiom(TPM) of miRNA of 29# normal sample
					exp_29ca	expressiom(TPM) of miRNA of 29# cancer sample
					exp_30N	expressiom(TPM) of miRNA of 30# normal sample
					exp_30ca	expressiom(TPM) of miRNA of 30# cancer sample
					exp_31N	expressiom(TPM) of miRNA of 31# normal sample
					exp_31ca	expressiom(TPM) of miRNA of 31# cancer sample
					exp_32N	expressiom(TPM) of miRNA of 32# normal sample
					exp_32ca	expressiom(TPM) of miRNA of 32# cancer sample
					exp_34N	expressiom(TPM) of miRNA of 34# normal sample
					exp_34ca	expressiom(TPM) of miRNA of 34# cancer sample
					exp_35N	expressiom(TPM) of miRNA of 35# normal sample
					exp_35ca	expressiom(TPM) of miRNA of 35# cancer sample
					exp_36N	expressiom(TPM) of miRNA of 36# normal sample
					exp_36ca	expressiom(TPM) of miRNA of 36# cancer sample
					exp_37N	expressiom(TPM) of miRNA of 37# normal sample
					exp_37ca	expressiom(TPM) of miRNA of 37# cancer sample
					exp_38N	expressiom(TPM) of miRNA of 38# normal sample
					exp_38ca	expressiom(TPM) of miRNA of 38# cancer sample
					exp_4N	expressiom(TPM) of miRNA of 4# normal sample
					exp_4ca	expressiom(TPM) of miRNA of 4# cancer sample
					exp_42N	expressiom(TPM) of miRNA of 42# normal sample
					exp_42ca	expressiom(TPM) of miRNA of 42# cancer sample
					exp_43N	expressiom(TPM) of miRNA of 43# normal sample
					exp_43ca	expressiom(TPM) of miRNA of 43# cancer sample
					exp_5N	expressiom(TPM) of miRNA of 5# normal sample
					exp_5ca	expressiom(TPM) of miRNA of 5# cancer sample
					exp_8N	expressiom(TPM) of miRNA of 8# normal sample
					exp_8ca	expressiom(TPM) of miRNA of 8# cancer sample
					exp_9N	expressiom(TPM) of miRNA of 9# normal sample
					exp_9ca	expressiom(TPM) of miRNA of 9# cancer sample
					exp_40N	expressiom(TPM) of miRNA of 40# normal sample
					exp_40ca	expressiom(TPM) of miRNA of 40# cancer sample

## Sheet: total-merge-exp
miRNA	exp_1N	exp_1ca	exp_10N	exp_10ca	exp_12N	exp_12ca	exp_13N	exp_13ca	exp_14N	exp_14ca	exp_15N	exp_15ca	exp_18N	exp_18ca	exp_19N	exp_19ca	exp_2N	exp_2ca	exp_20N	exp_20ca	exp_22N	exp_22ca	exp_23N	exp_23ca	exp_24N	exp_24ca	exp_25N	exp_25ca	exp_27N	exp_27ca	exp_28N	exp_28ca	exp_29N	exp_29ca	exp_30N	exp_30ca	exp_31N	exp_31ca	exp_32N	exp_32ca	exp_34N	exp_34ca	exp_35N	exp_35ca	exp_36N	exp_36ca	exp_37N	exp_37ca	exp_38N
hsa-let-7a-2-3p	1.49	0.47	1.14	0.27	0.38	0.61	0.36	1.26	0.82	0.001	1.42	0.32	0.55	0.57	1.8	1.06	0.56	0.86	1.68	1.46	0.96	0.31	1.09	0.52	1.24	0.001	1.17	0.14	1.32	0.33	0.62	0.47	2.41	0.62	0.97	1.86	1.31	1.98	1.04	0.93	1.6	1.85	1.35	0.42	0.72	1.3	0.35	0.61	1.22
hsa-let-7a-3p	140.36	150.07	152.16	115.75	65.62	108.69	133.07	203.81	215.77	188.24	116.61	65.37	178.08	410.33	99.58	140.15	161.71	277.77	198.72	345.25	164.2	197.81	171.74	161.24	164.29	181.98	100.76	132.69	204.63	146.73	105.65	129.75	158.71	155.13	125.26	87.97	144.95	208.89	176.69	114.54	240.42	398.62	180.01	113.58	216.82	199.18	86.63	98.68	141.07
hsa-let-7a-5p	13216.1	5686.39	11218	10830.4	7996.34	8767.67	6783.95	14984	6491.23	9961.08	9102.07	8456.65	10314.7	23892.5	4100.77	9570.43	9028.56	23478.5	7885.04	8332.6	11553.5	13787.3	6572.86	11302.3	10634.5	7398.67	9871.68	10033.9	8658.98	17149	7376.66	5841.56	14305.5	13860.2	12183	15615	7827	16168.1	9202.39	8398.63	10308.6	6731.8	9310.96	6382.97	8994.96	7450.9	6649.62	4985.56	10811.3
hsa-let-7b-3p	7.16	2.36	7.86	4.61	0.77	2.61	2.46	4.23	1.06	2.12	1.52	3.07	2.48	4.11	4.08	4.9	5.04	7.27	11.66	12.42	4.96	2.73	3.38	3.57	3.96	1.15	7.9	1.67	7.41	10.14	1.63	2.21	7.83	4.68	11.17	7.77	1.72	1.72	4.03	0.51	8.27	7.11	6.62	2.12	5.69	4.6	2.56	1.92	4.26
hsa-let-7b-5p	10075.8	2557.9	7249.83	8745.32	5635.77	4572.04	3858.49	11414.7	3183.63	6131	7111.47	5932.47	5845.19	11055	3258.91	9082.32	5538.55	12377	7128.7	5730.22	9682.68	9694.67	5295.04	9115.12	8839.98	2736.84	8751.45	1332.43	7602.36	22421.1	5298.55	5383.36	12035	11940.2	11099.9	18942.1	8103.98	10220.3	6923.45	1131.76	10207.5	5887.75	9250.2	3164.39	8791.55	5717.47	4985.95	3080.01	6290.92
hsa-let-7c-3p	0.84	0.33	2.28	0.18	0.72	0.23	0.72	0.33	0.41	0.55	3.88	1.58	0.84	0.47	2.66	2.36	1.54	0.36	5.5	2.66	3.87	0.27	0.76	0.19	0.69	0.58	0.93	0.52	1.89	0.05	0.72	0.47	2.84	1.23	1.78	0.65	1.22	1.94	2.76	0.32	1.32	2.4	2.81	0.48	3.12	0.56	0.74	0.47	2.35
hsa-let-7c-5p	3266.55	457.04	2802.48	898.41	1769.62	350.17	1266.37	481.29	640.4	734.36	3501.48	2664.2	2097.54	1885.38	1346.44	2461.5	2162.46	1418.06	3032.15	1035.07	3770.05	433.63	773.09	425.19	2114.81	2167.08	3101.26	787.77	2075.67	310.65	1956.93	1088.83	4099.64	2112.06	3975.41	2593.87	3104.46	3164.92	1897.68	646.64	3055.54	1224.66	3023.24	1537.39	2634.8	611.25	1373.61	323.23	2313.94
hsa-let-7d-3p	54.08	24.74	48.58	35.22	18.74	104.21	18.87	25.33	8.01	41.87	63.38	148.77	70.02	52.56	34.71	173.08	80.11	267.25	107.12	485.22	164.37	203.44	29.26	26.97	32.11	85.13	119.05	34.4	141.55	8.19	7.72	14.98	101.68	127.78	175	22.42	26.18	90.67	63.81	267.9	15.71	212.37	169.7	152.87	51.03	70.98	35.6	31.36	35.12
hsa-let-7d-5p	951.29	411.16	978.55	1191.5	1146.56	3076.31	672.16	1653.68	662.91	1911.95	960.08	1042.27	1143.27	1676.67	389.62	1110.94	842.32	2909.48	969.87	1884.21	1249.6	2608	718.17	1639.01	1292.98	1001.32	1029.23	396.36	1047.52	1010.09	700.02	1001.53	1062.74	1850.25	1173.65	1517.24	1124.55	2028.55	618.78	4145.82	992.09	822.9	918.11	1356.36	1052.59	1699.36	928.44	591.68	859.96
hsa-let-7e-3p	14.36	18.26	19.14	12.05	20.08	40.15	10.82	57.9	18.09	12.16	22.61	7.12	15.44	48.21	19.9	27.15	17.72	26.47	29.52	49.82	40.48	8.99	20.8	10.2	36.35	7.13	16.59	3.29	57.13	5.78	14	29.96	35.25	27.25	17.08	25.49	18.16	9.38	18.2	5.51	21.33	6.05	14.3	32.34	49.14	35.84	23.42	23.37	23.95
hsa-let-7e-5p	374.71	175.38	265.15	471.22	286.27	411.8	181.76	1270.23	121.55	307.17	194.21	57.84	264.04	925.25	89.51	244.33	157.47	368.94	195.62	244.18	364.09	126.61	208.42	254.55	433.25	116.78	175.31	55.01	367.38	197.83	112.65	300.74	318.65	342.09	260.84	606.56	161.84	210.61	191.5	83.21	314.41	36.43	219.45	591.59	327.2	691.15	240.6	246.1	223.9
hsa-let-7f-1-3p	7.9	5.34	18.16	7.62	6.23	23.72	12.38	19.61	11.73	13.4	9.32	11.41	15.44	22.26	6.03	9.24	11.66	20.33	26.86	38.64	11.87	16.01	7.37	6.15	8.51	3.81	11.27	4.63	20.07	6.39	5.9	6.34	10.15	10.46	16.9	8.51	11.82	10.21	12.5	32.02	21.28	26.82	11.37	6.26	14.18	16.27	12.28	8.79	8.43
hsa-let-7f-2-3p	5.02	2.79	6.16	1.23	4.12	18.16	3.01	0.33	0.53	33.99	4.22	4.37	3.03	32.09	0.57	3.46	6.02	13.69	0.53	9.85	9.18	22.72	1.53	3.76	0.51	2.17	4.24	0.52	0.52	1.8	7.38	7.04	9.58	0.47	4.87	6	0.54	0.88	4.03	2.04	11.19	9.1	10.31	2.6	13.59	8.88	4.14	10	4.11
hsa-let-7f-5p	9116.21	4075.77	10233.1	8626.19	5931.05	10180.6	7056.29	8330.24	12214.8	12067.6	6785.05	7546.7	9304.5	12588.7	4791.06	5992	8497.77	16973.9	6191	9045.63	8641.38	14032.9	7000.78	7856.8	7117.34	6613.68	9447.18	5578.07	5977.92	6545.06	5777.92	5980.33	7968.89	8757.77	10249.3	12408.2	6879.6	11307.2	8061.25	16867.6	7834.29	6776.86	7656.51	5951.72	5329.02	5797.28	6847.42	3782.89	8829.5
hsa-let-7g-3p	23.23	9.36	24.99	25.09	6.33	4.16	14	10.99	19.09	17.82	10.94	5.09	16.79	8.13	10.83	13.58	9	14.27	12.9	18.81	9.96	9.88	17.85	13.3	8.51	4.65	12.15	5.11	16.48	20.22	5.03	6.29	13.82	9.93	16.33	20.8	10.64	4.53	27.36	15.73	14.57	13.9	17.11	7.64	11.25	11.81	11.88	5.19	23.66
hsa-let-7g-5p	8581.82	4483.05	11723	11665.6	7491.1	6940.21	7486.05	7645.63	13044.5	18818.4	9336.96	8426.35	9909.07	10093.8	6653.81	8424.12	7580.8	13251.8	10585.3	17634	9193.97	13251.2	10077.6	11892.8	10232.1	10861.9	10841.7	8786.21	10409.8	11068.2	6708.52	5857.66	9913.53	9594.81	7755.37	12661.9	8307.81	10698.8	8818.19	11283.2	11866	15688.2	8158.23	7059.93	11323.8	10847	7507.9	3588.26	11096
hsa-let-7i-3p	22.39	38.97	74.29	57.67	28.76	10.41	25.97	78.28	47.49	31.83	28.75	4.42	32.58	13.19	23.55	16.21	34.09	21.05	44.36	38.91	15.31	9.48	108.96	78.55	44.4	27.58	40.16	3.05	61.19	75.73	4.84	54.52	41.33	14.05	65.44	101.23	18.89	6.21	60.82	74	28.32	8.82	34.34	36.96	20.01	38.44	43.24	36.23	69.7
hsa-let-7i-5p	3800.95	2510.5	4336.68	4177.18	2942.25	5235.07	3309.3	14059.5	5834.39	5549.96	2482.73	2340.29	4693.32	8381.52	1861.28	6134.97	2790.61	8887.4	3967.67	10605.2	4167.54	5709.3	6478.26	7659.24	6985.07	10604.7	3938.64	1884.34	5020.35	8927.32	2517.64	14029.6	4129.99	5337.96	4073.57	11804.9	3501.29	10048.3	3334.21	8616.32	5193.27	3778.37	3726	4158.81	4496.51	8318.27	3407.1	3443.72	4138.48
hsa-miR-1-3p	35.96	16.79	14.12	10.72	41.03	12.89	9.62	15.44	8.9	6.17	13.59	2.8	18.87	60.5	3.99	17.32	13.01	43.55	14.23	27.73	12.87	6.44	9.06	2.87	45.87	0.97	13.76	3.05	44.57	14.63	14.33	2.58	22.52	22.09	9.28	35.36	38.14	8.8	18.72	1.3	17.13	1.11	14.65	5.73	23.03	18.73	36.93	37.21	48.93
hsa-miR-100-3p	0.84	0.71	0.93	0.18	0.91	0.51	0.66	0.77	1.36	0.05	1.82	0.77	0.94	0.8	1.23	2.36	0.79	0.5	0.98	1.11	1.52	0.04	0.76	0.14	1.1	0.09	1.07	0.19	0.94	0.57	0.38	0.7	0.83	0.66	1.49	0.93	0.63	2.2	0.75	0.42	1.64	2.17	0.64	0.53	0.68	1.49	1.13	0.42	1.67
hsa-miR-100-5p	8168.22	3901.81	11234.5	1363.88	10475.7	3353.69	6149.23	7543.56	13139.6	461.05	14645.8	6711.9	8953.71	8536.53	12872.6	17615.1	6938.24	4780.85	13298.5	11821.1	12534.7	1553.22	8467.65	3513.5	16854.5	1965.23	12178.5	2180.79	17435.3	7687.62	6924.09	5452.44	16844.8	9912.39	8130.12	18530.9	13093	17602.9	7576.78	2842.74	15107.8	21503.7	10177.4	3604.01	10629.8	11741.8	10158.1	5784.54	13424.4
hsa-miR-101-3p	260.79	93.7	160.44	113.88	116.58	17.46	77.54	25.6	97.87	35.51	155.7	64.69	69.52	31.76	122.61	68.44	94.24	120.16	129.68	68.99	126.67	25.27	95.26	36.22	70.9	44.62	120.86	355.28	174.22	88.38	51.53	14.84	138.16	62.68	173.11	49.41	74.74	35.39	466.85	48.45	89.29	113.44	243.06	29.96	103.78	16.59	81.5	38	308.84
hsa-miR-101-5p	0.42	0.24	0.41	0.59	0.43	0.001	0.001	0.05	0.06	0.14	0.59	1.71	0.25	0.19	0.71	0.46	0.19	0.41	0.31	0.35	0.43	0.13	0.38	0.14	0.18	0.13	0.34	1.29	0.61	0.19	0.1	0.19	0.48	0.19	0.11	0.28	0.18	0.13	0.52	0.37	0.27	0.37	0.59	0.16	1.4	0.09	0.2	0.19	0.73
hsa-miR-103a-2-5p	10.5	12.34	10.76	5.98	6.04	19	5.29	1.98	7.54	9.9	6.87	12.22	3.13	3.45	4.08	3.93	4.71	16.13	10.02	9.18	4.04	12.52	4.8	3.24	2.07	2.3	8.34	20.33	4.96	3.6	3.64	5.02	8.13	14.67	7.05	6.51	7.65	12.63	9.85	11.85	5.21	11.22	10.02	6.89	5.01	4.23	3.25	7.85	5.29
hsa-miR-103a-3p	199.74	1853.16	708.69	1183.57	1533.25	434.12	491.97	39.66	1734.96	1531.74	767.14	182.77	297.96	1.61	241.56	703.87	553.73	30.27	12.14	714.14	776.58	817.22	539.12	618.28	213.15	1092.86	504.96	3334.48	1165.27	104.29	378.75	1802.78	1037.72	1332.12	491.42	1023.13	1591.55	44.94	96.93	16.34	359.71	43.91	420.56	87.07	288.18	1061.2	591.06	658.99	978.25
hsa-miR-103b	1303.05	11.26	1329.9	144.04	21.57	943.08	1117.06	1082.51	70.82	852.87	1117.6	5983.41	812.14	1694.49	985.17	463.27	296.52	1675.73	1623.04	1111.69	602.82	2322.05	807.76	345.65	840.83	751.07	859.82	479.67	251.37	1013.6	667.57	127.26	305.44	481.04	968.45	323.43	59.61	641.65	1223.38	277.67	1267.12	1771.8	1951.66	1765.55	1134.65	626.59	255.54	1199.53	626.45
hsa-miR-106a-5p	2.51	1.47	1.81	24.14	1.25	1.07	1.08	0.33	1.83	0.6	1.28	0.5	1.89	2.41	0.76	2.36	1.12	8.13	1.73	3.86	1.22	15.21	3.6	2.11	3.04	26.91	0.73	0.81	2.5	2.37	1.01	1.13	1.53	1.37	1.6	1.63	0.95	1.41	2.94	1.85	1.64	0.55	2.29	0.69	0.77	1.26	1.58	2.34	2.01
hsa-miR-106b-3p	14.82	25.26	19.76	25.41	11.79	28.39	5.17	12.58	2.89	24.83	11.68	27.46	6.11	17.53	9.83	18.93	5.41	30	10.55	15.17	12.26	38.64	11.57	199.39	9.52	16.16	12.39	23.14	10.62	28.99	2.97	13.67	11.15	14.85	13.92	11.68	8.38	13.47	11.75	16.15	9.5	12.79	18.69	17.07	7.14	8.23	9.81	12.62	11.22
hsa-miR-106b-5p	89.81	190.99	55.51	81.67	49.9	94.5	35.94	42.36	138.93	191.05	29.68	58.02	62.62	130.07	35.23	76.24	38.42	253.88	33.86	90.37	25.18	196.51	123.04	802.55	59.58	181.72	38.64	219.06	66.43	137.02	23.06	53.54	48.28	106.54	52.66	101.88	33.56	33.14	139.78	161.6	54.67	45.11	89.65	280.45	21.32	71.26	56.9	132.61	72.94
hsa-miR-107	24.86	33.49	28.04	4.52	7.33	10.22	10.16	2.69	10.78	13.63	8.58	15.6	3.82	4.35	20.51	3.19	5.18	16.31	11.61	8.34	5.87	13.77	10.26	5.64	5.7	5.71	13.13	72.91	11	3.46	4.41	4.41	11.33	24.41	16.62	8.37	8.2	4.05	21.14	2.31	10	12.19	25.84	21.16	7.14	4.04	4.29	11.5	20.57
hsa-miR-10a-3p	5.9	3.36	1.76	1.69	2.78	1.82	1.98	3.79	3.71	0.88	2.89	0.18	3.38	7.14	2.47	2.68	1.96	3.07	2.35	3.42	3.57	0.85	2.78	4.89	3.77	0.58	2.39	0.43	4.72	0.57	3.36	1.17	5.86	4.07	3.32	3.3	3.17	0.7	4.2	0.88	5.02	0.78	3.81	2.81	7.18	2.05	3.94	3.32	6.27
hsa-miR-10a-5p	2061.39	1565.45	1956.22	569.54	2373.27	998.78	1554.75	2014.33	2943.65	458.15	3079.79	493.97	2574.97	4007.88	1909.05	2267.96	2349.68	2492.88	2875.93	3657.73	3959.99	645.8	2345.86	2165.68	4616.03	973.12	3107.16	317.83	6095.44	347.35	1641.12	731.42	5257.77	3486.19	2940.95	1935.53	2019.41	636.36	2009.98	349.95	2542.83	698.66	2911.67	1741.48	6417.38	1268.28	2833.64	1726.33	5347.3
hsa-miR-10b-3p	0.37	0.52	0.05	1.92	0.1	0.05	0.001	0.22	0.06	0.23	0.001	0.14	0.001	0.09	0.001	0.001	0.09	1.81	0.13	0.27	0.04	1.25	0.05	0.52	0.09	0.44	0.001	0.95	0.001	0.43	0.001	0.28	0.09	0.14	0.11	0.05	0.09	0.53	0.29	0.51	0.001	0.42	0.001	0.27	0.001	0.001	0.1	0.28	0.24
hsa-miR-10b-5p	276.86	748.58	164.83	1842.94	104.11	263.75	72.49	297.92	112.89	861.35	84.13	1395.67	95.4	244.58	63.01	231.59	149.26	2504.76	206.13	1484.13	179.46	3037.97	116.66	878.61	297.76	1889.79	101.68	995.8	239.33	196.55	33.03	224.8	122.89	147.04	90.36	110.21	78.09	1735.94	104.93	535.25	187.48	2206.43	125.63	1179.79	450.27	150	353.46	399.66	390.45
hsa-miR-1179	1.07	0.28	0.83	0.41	0.72	0.23	0.78	0.11	1	0.09	0.59	0.23	0.3	0.38	0.38	0.79	0.7	1.22	0.58	0.53	0.39	0.22	0.49	0.23	0.37	0.49	0.98	0.33	0.8	0.28	0.38	0.09	1.31	0.8	1.66	0.98	0.54	0.13	1.21	0.32	0.41	0.18	0.82	0.16	0.63	0.23	0.49	0.56	0.69
hsa-miR-1180-3p	32.48	126.43	47.91	77.24	146.73	880.65	59.5	97.35	15.2	666.84	70.4	89.31	63.52	265.66	18.38	96.98	53.2	361.21	60.76	100.26	95.36	214.45	27.73	68.45	80.1	243.33	34.89	70.86	64.73	25.67	6.71	181.46	34.99	154.04	91.4	35.17	58.88	47.05	10.94	444.17	33.34	58.5	74.71	709.68	40.51	179.05	33.13	174.73	29.98
hsa-miR-1185-1-3p	2.69	1.99	1.97	0.23	8.44	47.72	0.48	0.11	0.88	0.14	0.39	0.14	0.74	0.85	0.38	0.55	0.19	1.54	0.31	0.4	0.96	0.18	0.98	0.33	0.51	0.18	0.54	0.19	0.76	0.05	0.24	0.8	0.57	22.8	0.86	4.42	0.32	0.04	0.4	3.1	0.59	0.09	0.47	0.42	0.27	0.98	1.82	1.87	0.78
hsa-miR-1185-5p	3.72	2.55	6.98	0.73	11.6	79	3.31	1.21	7.37	1.01	3.83	0.18	3.13	5.44	2.18	1.8	2.1	2.48	2.35	3.15	5.91	1.74	3.99	1.17	4	1.02	2.39	1.05	3.35	1.85	2.35	2.44	2.93	38.75	2.01	10.47	2.08	0.09	5.99	3.52	5.3	0.83	2.81	1.8	2.66	3.44	7.59	5.66	3.53
hsa-miR-122-3p	658.12	837.88	888.99	197.37	594.68	420.02	495.15	50.71	316.81	600.7	1695.04	920.14	730.95	273.74	1318.28	860.64	891.52	804.1	1433.4	1085.65	2044.48	402.64	270.16	56.9	428.69	349.84	1806.84	893.12	829.43	13.12	605.25	125.39	1258.93	669.23	1324.41	34.85	1103.94	725.89	962.14	576.48	858.18	3043.74	1401.37	876.28	1247.65	195.79	622.66	330.9	609.85
hsa-miR-122-5p	225577	227255	208175	108343	142492	61720.8	112275	12256.2	101244	212073	192271	158750	159021	49265.3	145310	136503	151074	114896	156364	58496.3	194074	92939.6	82495.1	20298.2	96213.3	61671.5	189077	212934	68240.2	4336.71	113713	24145.3	205000	266958	158759	26005.7	158111	234468	222534	60041.9	152691	87286.3	248250	108866	93664.5	13076.7	71682.7	55450.4	132130
hsa-miR-1224-5p	0.09	0.38	0.1	0.73	0.05	0.28	0.001	0.11	0.18	0.23	0.2	0.09	0.05	0.33	0.05	0.46	0.001	0.5	0.04	0.13	0.13	0.31	0.05	0.001	0.23	0.8	0.1	0.1	0.05	0.05	0.05	0.05	0.39	0.43	0.06	0.14	0.09	0.53	0.06	0.05	0.09	0.001	0.23	0.95	0.001	0.001	0.15	0.37	0.24
hsa-miR-1226-3p	1.02	13.2	0.52	0.73	5.03	29.41	0.72	4.45	0.53	23.95	1.77	3.56	4.37	3.54	0.62	2.68	2.28	9.26	2.66	11.31	1.87	8.05	2.13	0.66	0.97	8.94	2.63	3.63	3.31	0.47	0.34	4.46	2.84	27.72	3.27	1.16	1.72	8.58	2.36	25.31	0.55	4.29	2.58	64	0.68	10.78	2.27	33.56	0.69
hsa-miR-1227-3p	0.37	1.09	0.72	0.59	0.53	2.75	0.42	2.03	0.12	1.57	0.88	0.95	0.7	1.75	0.14	1.15	0.61	1.31	0.66	3.11	0.61	1.74	0.6	0.33	0.78	3.01	0.68	0.52	1.46	0.81	0.05	1.41	0.83	2.41	0.8	0.47	0.36	0.53	0.46	1.67	0.27	0.55	1.11	7.64	0.32	1.53	0.69	5.89	0.29
hsa-miR-1228-3p	4.88	9.55	6.62	2.33	2.06	11.67	6.49	4.07	10.55	7.74	1.32	1.49	4.02	3.64	0.95	2.26	4.1	2.94	2.97	13.97	0.57	2.68	9.5	2.77	3.5	4.74	2.1	1.62	2.69	0.95	0.72	4.56	1.49	5.06	8.31	3.4	1.22	3.48	4.61	6.62	2.01	1.62	3.93	9.12	1.04	3.9	4.93	13.65	2.11
hsa-miR-1228-5p	3.3	6.81	5.54	2.1	4.7	6.96	4.21	3.52	6.42	4.51	2.4	0.81	2.63	1.51	1.38	1.25	4.8	1.9	2.66	6.26	0.78	3.13	5.57	2.44	3.13	1.9	3.17	2	2.88	1.71	0.53	3.48	2.58	4.4	6.59	3.49	1.86	2.02	1.09	7.08	1.51	0.88	2.93	8.17	1.04	1.63	6.06	10.61	2.74
hsa-miR-1229-3p	1.07	3.12	1.97	1.37	0.48	3.88	0.54	0.33	0.29	8.15	0.2	0.72	0.55	1.65	0.05	0.55	0.56	1.67	0.71	2.79	0.13	7.02	1.2	1.79	0.51	5.4	0.83	3.86	0.47	1.09	0.001	0.99	0.35	3.88	1.6	0.37	0.18	1.45	0.75	1.48	0.46	0.6	0.82	3.39	0.14	1.72	0.3	6.22	0.54
hsa-miR-1234-3p	0.14	0.43	0.31	0.05	0.34	0.61	0.12	0.27	0.12	0.18	0.39	2.39	0.15	0.33	0.28	0.32	0.14	0.41	0.49	0.31	0.26	0.67	0.001	0.52	0.23	0.62	0.39	0.43	0.33	0.05	0.05	0.09	0.26	0.19	0.46	0.05	0.001	0.22	0.29	0.14	0.001	0.37	0.29	0.53	0.14	0.23	0.15	0.56	0.2
hsa-miR-1237-3p	0.42	0.24	0.52	0.46	0.38	0.7	0.24	0.33	0.06	0.55	0.29	0.23	0.6	0.66	0.09	0.46	0.19	0.63	0.53	0.62	0.17	0.89	0.55	0.56	0.51	0.44	0.44	0.72	0.05	0.52	0.14	0.28	0.35	0.33	0.57	0.28	0.14	0.53	0.12	0.6	0.18	0.28	0.94	1.01	0.09	0.46	0.2	0.65	0.2
hsa-miR-124-3p	7.53	3.78	84.38	1158.29	2.06	2.33	55.9	2.14	63.52	67.38	3.53	62.53	1.34	3.12	4.32	46.18	2.05	836.08	4.48	66.99	0.91	0.13	63.21	74.84	5.47	0.13	2.49	0.24	7.37	3.22	0.38	0.75	0.87	0.76	104.75	116.77	2.9	801.07	124.52	0.74	2.92	72.99	150.66	3.71	3.39	2.51	50.39	1.68	15.67
hsa-miR-1246	8.5	7.99	10.3	32.07	6.52	621.48	3.13	15.16	2.36	28.42	2.35	3.83	3.43	240	5.13	7.2	10.07	21.05	4.48	12.87	6.83	38.6	5.9	229.74	9.11	92.12	1.37	11.21	16.38	761.77	33.56	70.3	7.3	123.33	3.04	33.12	5.84	7	2.94	93.76	7.49	0.51	7.32	37.59	7.32	106.17	5.77	39.08	3.92
hsa-miR-1247-3p	0.84	0.85	3.67	0.05	0.58	0.001	0.12	0.44	0.53	1.15	2.75	0.001	0.25	0.9	0.85	0.28	0.19	1.22	0.44	0.22	4.52	0.04	0.93	0.19	0.37	0.001	0.68	0.1	0.9	0.47	1.01	0.05	1.18	0.43	0.52	4.51	0.82	0.001	0.46	6.62	0.37	0.09	0.41	0.16	3.61	0.28	1.28	1.92	8.77
hsa-miR-1247-5p	19.14	18.87	104.46	6.21	15.39	5.79	15.87	11.1	2.12	42.42	47.29	1.04	17.43	21.41	21.32	3.32	5.18	53.4	10.37	11.58	40.57	0.85	7.75	1.93	9.39	0.84	12.44	0.19	18.93	2.37	3.79	2.4	20.64	18.78	13.98	13.26	11.46	0.18	9.21	109.26	0.87	3.65	11.25	5.51	18.38	6.83	21.84	39.83	132.3
hsa-miR-1249-3p	6.74	17.97	3.93	4.93	3.64	4.25	1.86	6.92	1.36	2.21	2.01	12.04	2.43	2.55	3.7	7.25	11.56	9.58	4.21	31.5	8.04	13.01	6.55	1.97	3.31	9.61	7.07	10.93	4.72	8	1.2	4.41	10.06	15.99	6.3	4.19	3.31	5.37	8.12	17.96	1.92	0.78	7.32	6.31	2.57	2.88	3.65	11.17	3.23
hsa-miR-1250-5p	0.46	1.04	0.57	1.41	0.14	0.93	0.42	0.71	0.77	0.92	0.15	0.18	0.74	1.32	0.24	0.79	0.37	0.23	0.31	0.49	0.001	3.13	0.76	0.66	0.32	0.49	0.54	0.33	0.42	1.99	0.05	1.83	0.39	0.43	0.4	0.7	0.68	0.13	0.29	3.33	0.64	0.09	0.41	2.65	0.14	1.07	0.44	0.33	0.24
hsa-miR-1254	0.46	0.47	0.36	0.14	0.43	0.65	0.06	0.49	0.18	1.43	0.25	0.45	0.2	1.32	0.05	0.97	0.84	1.13	0.44	0.89	0.22	0.45	0.27	0.14	0.14	1.59	0.2	0.14	0.76	1.56	0.1	0.75	0.44	0.66	0.92	0.09	0.41	0.26	0.12	0.56	0.37	0.46	0.88	2.49	0.14	0.98	0.39	1.08	0.15
hsa-miR-1255b-5p	0.23	0.66	0.21	3.6	0.001	0.33	0.12	0.11	0.06	0.6	0.29	0.001	0.2	0.43	0.09	0.28	0.14	0.54	0.18	0.18	0.17	0.72	0.27	0.56	0.09	0.35	0.1	0.19	0.14	0.38	0.05	0.19	0.09	0.24	0.23	0.09	0.09	0.001	0.17	0.51	0.05	0.05	0.41	0.64	0.18	0.14	0.25	0.14	0.49
hsa-miR-125a-3p	3.53	2.7	3.41	5.57	1.92	3.13	1.14	5.71	1.59	0.97	1.37	1.04	0.74	3.21	1.66	3.56	2.47	2.53	2.22	3.68	4.3	1.03	2.57	2.02	2.58	0.71	1.71	0.33	2.97	1.71	0.58	3.01	4.15	2.27	3.44	5.91	1.13	0.48	1.61	0.6	3.24	1.11	4.86	3.18	4.02	6.46	4.29	2.76	2.3
hsa-miR-125a-5p	455.51	338.6	363.76	646.46	327.2	598.37	173.47	579.57	184.95	264.15	297.43	125.15	287.33	543.14	271.28	415.15	184.79	382.44	485.69	613.3	479.32	190.52	374.21	376.33	777.93	259.89	362.58	140.42	757.38	235.58	151.58	690.7	745.58	447.49	393.43	822.33	209.81	211.27	358.74	122.31	200.55	108.54	491.28	658.09	580.69	797.18	433.78	264.89	792.07
hsa-miR-125b-1-3p	17.89	5.58	10.86	4.75	9.97	4.58	3.55	4.45	5.36	0.46	11.53	2.89	3.08	5.77	4.42	14.04	10.58	7.18	10.41	13.27	10.04	0.98	6.06	2.91	7.91	0.89	11.12	0.19	15.68	4.74	2.64	4.32	14.04	6.48	9.68	25.26	9.24	3.04	4.43	4.03	9.77	7.8	10.9	3.08	7	9.95	7.84	6.82	10.14
hsa-miR-125b-2-3p	41.63	9.6	38.39	1.83	21.33	3.92	27.47	5.93	26.34	7.51	31.94	28.67	31.93	19.66	28.25	55.46	40.57	6.32	25.75	20.9	35.74	5.14	22.16	9.16	31.93	56	42.84	11.59	25.21	4.83	15.58	29.16	32.32	16.42	42.46	20.61	28.22	15.36	22.29	5.41	25.94	27.38	38.5	17.82	26.56	11.2	28.3	12.25	37.33
hsa-miR-125b-5p	2991.78	343.29	1548.22	370.25	776.36	214.44	497.25	333.24	593.56	147.2	926.03	709.1	918.76	554.86	1235.56	1147.69	584.46	618.88	1160.48	713.92	1240.03	163.51	774.07	463.57	2098.06	640.94	1048.11	1108.84	1311.83	410.72	790.38	666.89	1994.19	793.61	1053.89	1706.03	1312.16	1036.28	1157.09	226.67	829.68	675.81	1217.78	533.32	1353.01	357.96	1031.78	328.05	2295.76
hsa-miR-126-3p	21501.9	20048.9	23368.8	12983.6	18551.1	17719.7	17718.7	5341.96	26464.3	12833.4	25867.8	14756.7	19870.7	17694	19538.1	37683.4	20452.1	18216.7	24470	51458.4	28281.9	14548.7	16974.7	3584.68	17432.2	11990.2	22418.1	13069.7	31267.3	11021.9	16308.5	8222.8	25470.3	23267.9	27243.8	24172.5	13567.4	17130.1	22432.9	14225.9	16364.9	15571.7	28391.5	54690.1	25137.9	12549.9	22939.2	19985	28520.9
hsa-miR-126-5p	989.44	1436.76	1363.89	1047.19	708.29	768.08	539.45	294.62	1106.7	878.9	992.85	446.9	1150.37	638.18	1445.35	1654.1	1262.27	1235.15	1282.58	1914.86	853.28	686.94	1156.58	309.38	655.88	466.88	1556.09	1055.54	1515.89	711.61	282.44	266.78	928.7	1261.16	2089.5	1269.83	539.65	548.07	2085.09	1090.72	631.73	462.93	1375.41	3039.99	815.58	478.87	1307.44	1160.12	1211.51
hsa-miR-1260a	6.41	10.31	15.42	13.28	6.04	4.02	3.31	12.91	9.37	8.66	17.56	49	11.92	3.26	15.2	8.91	4.57	4.47	21.94	12.87	4.57	2.15	14.58	21.61	3.86	2.7	26.45	0.91	25.59	7.77	0.48	3.29	5.64	3.26	52.2	13.17	8.83	1.41	11.29	18	8.18	14.96	21.04	53.71	6.46	18.55	14.59	9.44	11.76
hsa-miR-1260b	12.31	14.9	10.55	17.93	8.72	17.42	5.29	6.92	5.07	3.78	12.61	138.9	6.41	4.82	12.06	18.24	9.33	8.54	21.18	8.61	13.05	2.59	8.79	17.99	5.98	3.85	20.25	2.58	16.29	9.19	1.05	3.52	11.02	4.73	26.07	6.79	7.38	2.55	6.97	9.76	6.21	24.52	24.14	30.49	9.26	17.48	7.79	4.58	9.45
hsa-miR-1261	4.37	12.11	1.14	1.05	3.88	5.04	1.86	0.49	4.01	0.97	36.06	13.8	0.84	3.45	13.44	34.68	1.68	2.26	25.57	43.52	18.61	3.26	3.99	1.5	2.94	21.96	2.63	4.34	8.22	1.56	2.68	2.4	52.66	8.85	9.8	2.05	19.48	5.28	8.01	18.6	5.98	36.98	5.92	1.01	12.33	16.04	7.59	8.6	15.92
hsa-miR-1266-5p	0.001	2.27	0.26	0.46	0.29	1.26	0.18	0.6	0.12	1.52	0.001	0.68	0.25	1.7	0.05	1.11	0.09	0.72	0.13	0.8	0.17	1.79	0.16	1.27	0.18	1.33	0.29	0.48	0.47	0.76	0.05	0.66	0.001	0.71	0.06	0.14	0.14	1.23	0.06	1.94	0.05	0.23	0.12	0.64	0.09	0.33	0.25	0.56	0.05
hsa-miR-1268a	2	3.12	2.28	6.94	0.81	0.37	1.5	1.32	1.94	1.89	0.78	0.99	1.14	3.07	1.57	2.68	1.21	2.53	0.8	1.42	1.13	4.47	2.84	7.99	2.25	0.84	1.51	1.86	0.57	10.51	0.14	1.46	1.44	0.9	2.23	2	1.22	0.62	0.75	1.99	1.28	0.92	1.46	0.58	0.81	2.46	3.06	0.89	0.98
hsa-miR-1268b	2.18	2.32	2.64	2.65	0.91	0.61	1.32	0.66	1.77	1.38	0.44	0.77	1.14	1.23	0.71	1.75	0.7	1.67	1.37	1.02	1.3	3.44	2.07	3.81	1.52	0.89	0.83	2.86	0.71	6.73	0.34	0.94	1.18	0.71	1.2	1.72	1.49	0.4	0.63	1.02	0.59	0.28	1.99	0.21	0.23	1.26	1.92	1.22	1.27
hsa-miR-1269a	0.79	1.89	0.52	0.96	56.52	782	0.66	116.41	0.001	2.03	2.94	2.98	2.28	66.26	0.62	42.02	0.23	1.17	0.53	1.11	0.7	0.67	0.27	35.38	3.59	25.41	2.54	501.34	0.66	0.66	0.05	0.33	0.48	3.17	1.03	0.84	0.72	11.49	0.46	27.35	0.73	709.19	0.29	3.5	0.14	0.65	0.54	3.09	0.1
hsa-miR-1269b	4.23	47.44	0.31	0.05	0.1	6.12	0.06	22.96	0.001	28.23	0.05	10.19	0.3	0.14	0.19	18.47	1.17	0.05	0.001	23.6	0.91	118.11	0.33	0.09	5.75	2.66	1.37	253.17	0.57	11.22	1.97	159.81	2.45	0.57	14.78	5.44	0.23	0.31	0.29	0.14	0.23	0.6	0.06	0.42	0.09	42.53	0.2	73.95	0.29
hsa-miR-127-3p	550.75	421.89	639.78	234.97	1246.26	10471.5	262.72	150.3	363.71	62.73	218.59	44.36	265.48	477.21	175.32	280.49	234.92	675.58	96.61	337.97	461.19	119.28	365.37	118.91	349.42	115.62	195.32	99.25	198.63	108.6	212.46	271.29	245.48	5887.73	264.62	1571.91	203.47	359.86	182.8	309.87	258.96	80.15	196.54	423.77	260.09	274.67	634.84	547.69	357.43
hsa-miR-127-5p	1.35	0.52	2.38	1.32	2.21	12.51	0.84	0.22	2.3	0.28	0.29	0.09	0.3	0.71	0.38	0.32	0.19	1.9	0.18	0.71	0.39	0.45	2.4	0.7	1.56	0.31	0.15	0.33	0.66	0.66	0.48	0.42	0.35	12.58	0.29	6.93	0.41	0.7	1.67	0.83	1.28	0.05	0.64	0.53	0.45	0.46	1.68	0.75	0.93
hsa-miR-1270	0.51	2.18	0.21	0.27	1.2	5.84	0.24	1.15	0.35	1.38	0.2	0.09	0.99	4.96	0.38	1.89	0.23	2.39	0.53	0.62	0.7	0.49	0.6	5.68	0.87	3.81	0.63	2.82	0.99	0.19	0.19	0.47	0.61	1.8	0.57	1.4	0.32	0.04	0.69	2.92	0.87	0.05	0.53	0.53	1.08	0.98	0.69	3.41	0.49
hsa-miR-1271-5p	11.01	11.45	15.62	17.79	12.56	8.5	5.65	7.09	15.02	7.97	16.09	8.52	18.97	20.13	8.07	19.4	4.66	12.65	10.77	20.14	14.05	12.43	13.87	15.27	16.56	14.96	8.44	4.15	16.34	3.84	5.94	17.94	10.67	7.52	8.14	7.86	12.05	39.97	5.99	16.61	7.9	4.8	14.06	8.64	18.34	9.95	7.54	12.57	18.96
hsa-miR-1273c	0.74	5.3	1.45	0.5	0.77	1.21	0.96	1.21	0.82	0.51	1.23	1.17	0.65	1.37	0.66	1.25	0.65	0.81	0.93	2.09	1.04	1.25	0.6	0.38	0.87	1.2	0.73	0.33	0.8	0.14	0.24	0.47	1.09	0.71	1.03	0.65	0.95	0.31	0.58	0.79	0.69	1.52	1.23	0.53	0.72	0.42	0.89	0.75	1.52
hsa-miR-1273g-3p	1.63	0.66	1.66	0.23	1.05	1.54	0.54	0.44	0.24	0.32	0.83	0.63	0.4	0.52	2.99	2.03	0.98	0.9	0.53	0.8	0.91	0.18	0.6	1.17	1.61	0.44	0.59	0.33	0.57	0.38	1.34	0.001	2.62	0.28	1.6	0.28	0.86	0.18	0.4	1.48	0.64	0.78	0.59	0.16	0.59	0.79	1.23	0.33	1.03
hsa-miR-1273h-3p	0.42	0.28	0.36	0.32	0.34	0.09	0.42	0.001	0.41	0.32	0.39	0.14	0.45	0.33	0.001	0.18	0.28	0.36	0.4	0.62	0.17	0.09	1.97	0.56	0.64	1.2	0.49	0.14	0.38	0.19	0.1	0.09	0.26	0.19	0.57	0.84	0.05	0.04	0.17	0.23	0.18	0.09	1.64	0.21	0.14	0.09	0.49	0.28	0.73
hsa-miR-1273h-5p	0.51	0.14	0.36	0.18	0.34	0.33	0.06	0.11	0.35	0.18	0.2	0.14	0.3	1.32	0.28	0.09	0.14	0.23	0.22	0.31	0.22	0.04	0.71	0.33	0.41	0.4	0.34	0.1	0.28	0.09	0.38	0.19	0.13	0.09	0.11	0.74	0.09	0.18	0.23	0.09	0.14	0.18	1.52	0.27	0.001	0.37	0.05	0.14	0.29
hsa-miR-1275	4.79	17.88	4.45	1.87	2.54	1.54	2.28	0.77	2.06	1.47	10.11	3.34	1.84	0.85	4.32	3.14	3.03	0.77	5.19	5.15	11.13	0.63	1.64	1.74	1.93	6.42	5.81	3.53	3.92	0.57	0.43	0.28	4.42	6.01	9.28	1.81	1.36	5.55	1.79	2.27	2.37	2.82	14.06	2.76	3.57	1.3	2.66	3.46	5.58
hsa-miR-1276	0.09	0.8	0.31	0.32	0.58	3.74	0.3	0.05	0.06	1.2	0.1	0.05	0.1	1.18	0.05	0.46	0.14	0.5	0.13	0.35	0.22	0.72	0.22	0.33	0.05	0.62	0.15	0.1	0.24	0.05	0.14	0.89	0.17	0.71	0.11	0.37	0.09	0.92	0.001	1.34	0.23	0.18	0.06	2.55	0.001	0.79	0.49	0.65	0.001
hsa-miR-1277-3p	2.18	10.59	2.95	2.83	4.7	7.38	5.11	3.85	20.09	7.83	6.62	5.55	3.97	8.32	5.37	2.31	1.59	8.13	3.55	10.43	3.35	14.89	5.19	2.35	1.66	9.65	4.05	5.82	5.67	2.7	2.54	4.32	1.92	2.74	3.27	4.14	4.03	5.46	14.11	2.27	9.13	6	2.7	3.82	2.89	10.04	2.71	13.51	7
hsa-miR-128-1-5p	0.05	0.57	0.16	0.09	0.1	0.14	0.12	0.16	0.18	0.51	0.15	0.45	0.2	0.33	0.19	0.32	0.19	0.41	0.4	0.75	0.35	0.36	0.16	0.28	0.6	0.66	0.15	0.14	0.09	0.05	0.1	0.28	0.09	0.05	0.17	0.14	0.27	0.79	0.06	0.19	0.23	0.14	0.53	0.05	0.14	0.56	0.1	0.19	0.1
hsa-miR-128-3p	117.78	192.17	156.19	365.28	107.9	201.28	122.62	136.24	155.73	328.35	122.54	153.64	142.13	339.2	97.91	251.4	122.73	870.37	192.03	259.49	161.46	464.94	181.78	254.08	188.26	396.01	118.18	139.76	194.05	140.19	62.37	797.07	168.95	261.48	165.49	97.6	176.92	1081.35	184.76	275.58	219.45	169.76	221.73	317.09	129.52	375.3	112.12	203.99	85.33
hsa-miR-1284	0.05	3.41	0.21	0.05	1.01	2.61	0.18	1.26	0.12	4.38	0.83	0.54	0.25	2.08	0.28	0.6	0.28	2.08	1.15	2.22	0.91	1.52	0.66	0.52	0.23	2.04	0.54	0.76	1.13	0.24	0.24	0.8	0.48	1.85	0.57	0.65	0.63	1.23	0.17	4.91	0.41	1.8	0.64	5.2	0.63	1.35	0.35	0.75	0.34
hsa-miR-1285-3p	0.56	1.75	1.6	0.32	0.48	0.33	0.3	0.38	0.53	0.46	0.44	0.5	0.6	0.52	0.38	0.74	0.75	0.9	0.44	0.31	0.48	0.72	0.27	0.61	0.23	0.93	0.44	0.57	0.28	0.38	0.19	0.33	0.48	0.28	0.46	0.79	0.14	0.09	0.69	1.39	0.73	0.92	1.11	1.27	0.45	0.46	0.3	0.33	0.49
hsa-miR-1285-5p	0.28	1.7	0.62	0.64	0.48	0.79	0.12	1.59	0.47	1.06	0.34	0.45	0.4	1.23	0.09	0.6	0.23	0.36	0.31	0.53	0.09	0.27	1.15	2.54	0.32	1.28	0.39	0.38	0.66	0.38	0.001	0.7	0.17	0.43	0.4	0.51	0.23	0.35	0.35	1.53	0.14	0.28	0.94	0.9	0.18	1.49	0.1	0.65	0.49
hsa-miR-1287-3p	2.09	3.93	3.16	1.83	1.87	8.59	1.98	1.37	2.36	2.44	1.91	7.08	2.73	4.87	1	1.15	1.31	4.88	3.37	1.73	2.96	2.15	1.53	0.52	1.56	2.26	3.27	4.82	2.46	2.7	0.58	10.05	2.54	3.6	2.41	1.4	1.72	2.99	1.44	2.96	3.88	3.23	3.05	3.92	2.62	11.39	1.33	1.96	1.57
hsa-miR-1287-5p	8.46	15.23	12.62	7.21	10.02	30.16	4.33	5.71	4.89	10.18	6.72	22.41	6.75	17.11	3.04	3.6	4.52	24.26	6.29	5.41	7.78	5.9	3.28	2.26	9.2	6.2	6.59	17.56	7.08	6.63	3.31	29.49	5.42	10.55	6.13	7.96	5.57	10.12	3.23	6.29	9.13	9.1	6.74	12.3	5.33	15.94	3.65	5.33	6.02
hsa-miR-129-5p	0.51	0.33	1.29	27.19	0.53	0.79	0.78	2.97	0.59	1.2	0.64	1.44	0.7	1.8	0.09	1.15	0.23	48.97	0.31	1.77	0.78	0.58	1.04	1.22	1.47	1.37	0.63	0.19	0.57	0.57	0.05	0.47	0.31	0.66	0.57	1.54	0.5	44.54	1.5	0.32	0.55	1.34	2.58	0.64	0.68	2	0.15	0.89	0.64
hsa-miR-1290	3.02	0.99	1.71	1.64	0.91	46.92	0.96	1.81	1.3	2.63	0.64	0.86	1.14	26.66	1	2.12	0.93	2.39	0.98	3.68	1.52	4.87	4.64	20.91	1.43	6.86	0.78	0.38	1.51	35.33	8.29	1.03	2.06	8.8	0.57	8.42	1.4	0.7	0.92	4.91	2.24	0.14	1.7	3.02	1.76	10.09	1.28	6.92	0.93
hsa-miR-1291	2.42	0.95	0.31	0.41	0.1	0.05	0.06	0.22	0.53	0.55	0.1	0.59	0.25	0.24	0.14	0.14	0.23	0.99	0.27	0.84	0.43	0.31	0.38	0.66	0.37	1.06	0.15	0.24	0.24	0.81	0.96	0.05	0.26	0.38	0.23	1.63	0.32	0.31	0.17	0.65	0.32	0.05	0.35	0.64	0.27	0.28	0.05	0.51	0.59
hsa-miR-1292-5p	1.16	1.84	1.66	2.42	2.4	7.66	0.9	2.36	0.59	5.34	1.23	2.25	0.99	3.88	0.76	1.34	1.17	1.76	2.08	1.86	2.39	7.92	0.55	1.93	1.61	9.52	1.32	2.24	1.79	2.51	0.58	1.78	1.09	2.98	1.32	1.77	1	2.2	0.29	6.43	1.32	1.15	2.34	9.76	1.35	3.9	1.18	7.34	0.93
hsa-miR-1294	0.28	0.99	0.57	1.19	0.24	0.47	0.18	3.02	0.18	0.55	0.15	0.45	0.2	1.7	0.57	0.92	0.33	0.36	0.44	0.93	0.74	0.54	0.49	1.36	0.6	0.8	0.39	0.67	0.66	0.76	0.19	0.89	0.35	0.47	0.4	1.35	0.32	0.48	0.29	0.46	0.41	0.46	1.05	0.48	0.45	0.7	0.44	0.56	0.2
hsa-miR-1295a	0.33	4.07	0.88	0.09	0.72	7.66	0.9	0.27	0.53	1.43	0.74	10.55	0.55	0.99	0.95	9.93	0.75	4.92	0.58	0.35	0.7	2.59	0.22	0.19	0.69	2.79	0.59	0.57	1.46	0.47	0.24	2.16	1.18	0.66	1.03	1.12	0.5	1.5	0.69	5.97	0.73	6.05	1.93	2.49	0.32	0.19	0.39	0.14	0.59
hsa-miR-1295b-3p	9.2	27.57	10.71	1	8.01	1.03	3.61	0.71	6.42	12.94	9.62	29.3	6.21	4.02	6.98	17.5	6.48	6.19	5.27	1.91	7.13	11.85	3.28	0.52	3.22	2.52	6.68	6.92	3.35	0.24	4.31	2.91	7.22	6.62	6.25	2	11.28	5.99	6.68	0.97	9.23	22.58	6.09	0.74	6.91	1.58	5.08	2.48	8.52
hsa-miR-1295b-5p	0.74	1.75	0.72	0.14	0.81	1.07	0.78	0.49	0.88	1.7	2.06	2.66	0.89	2.13	1.23	17.46	1.07	5.33	0.8	0.84	1.26	0.76	0.27	0.001	0.37	4.47	1.46	1.15	0.24	0.001	0.58	4.13	0.52	0.57	0.97	0.19	1.09	0.7	1.32	0.97	0.5	7.57	0.35	3.13	0.63	0.28	0.3	0.23	0.49
hsa-miR-1296-5p	28.76	22.23	18.88	13.69	29.77	67.7	11.96	38.67	2.59	26.99	46.21	25.25	8.44	32.94	26.5	23.14	18.61	77.16	44.94	87.27	41.09	9.88	7.92	12.45	22.27	20.41	23.32	18.04	35.98	9.85	5.7	23.72	23.75	28.05	36.56	8.79	9.19	20.38	8.52	73.4	3.79	25.3	21.74	20.36	27.23	6.83	8.92	16.27	43.5
hsa-miR-1301-3p	12.92	23.51	15.26	17.7	18.41	56.82	12.32	15.22	6.95	72.91	13.44	15.28	8.09	21.13	4.56	17.46	13.01	62.66	17.59	56.03	18.18	61.49	10.37	4.28	10.54	21.6	13.47	13.26	15.86	5.54	3.93	20.47	9.62	23.75	19.6	14.14	9.01	26.14	7.66	11.52	5.43	10.48	14.53	21.47	5.28	16.83	8.14	48.43	8.38
hsa-miR-1303	13.43	43.8	4.97	5.25	6.18	10.41	4.93	3.9	2.65	18.88	13.78	37.28	7.7	10.59	9.73	46.96	9	11.75	23.18	54.04	23.13	40.52	2.73	3.01	8.14	35.86	20.59	16.8	4.15	1.23	2.73	7.14	3.54	4.97	5.5	1.4	4.62	9.11	2.48	4.95	3.15	16.76	14.59	22.22	3.66	9.58	4.98	7.81	1.62
hsa-miR-1304-5p	0.19	1.56	0.16	0.55	0.1	0.75	0.001	0.27	0.24	0.74	0.15	0.14	0.05	0.28	0.05	0.23	0.05	0.36	0.35	0.4	0.22	0.49	0.49	0.52	0.23	0.71	0.2	0.14	0.38	0.28	0.001	0.33	0.09	0.24	0.11	0.09	0.001	0.18	0.06	0.83	0.05	0.09	0.23	0.48	0.27	0.19	0.25	0.28	0.05
hsa-miR-1306-3p	0.19	0.28	0.05	0.14	0.43	0.37	0.12	0.22	0.18	1.06	0.15	0.36	0.2	0.47	0.09	0.65	0.33	0.9	0.31	0.75	0.17	0.85	0.44	0.23	0.32	1.55	0.2	0.05	0.33	0.19	0.19	0.56	0.22	0.57	0.4	0.19	0.32	0.13	0.12	0.23	0.14	0.05	0.7	1.86	0.001	0.14	0.25	0.51	0.05
hsa-miR-1306-5p	2.28	5.11	3.1	0.91	2.73	8.96	1.26	2.2	0.77	5.11	2.11	3.65	1.39	5.81	1.33	3.23	0.93	15.22	2.88	9.67	1.22	6.84	0.71	2.68	1.52	6.77	1.71	4.34	3.4	4.5	0.38	4.23	2.19	4.64	2.98	2.84	1.4	4.09	1.9	4.35	0.91	2.4	5.27	16.91	0.99	1.81	1.87	4.53	2.79
hsa-miR-1307-3p	178.97	613.83	274.15	354.37	247.01	693.61	135.72	206.67	132.75	1132.27	270.74	398.53	199.53	428.15	114.87	377.47	159.99	460.68	208.12	587.03	158.63	346.73	293.31	301.91	295.23	874.84	141.94	339.44	160.91	80.37	59.06	570.81	211.02	496.79	236.6	150.04	147.26	400.53	74.58	380.26	129.75	232.78	302.95	775.32	91.72	474.96	194.31	638.51	188.1
hsa-miR-1307-5p	22.16	25.97	87.44	23.59	8.01	6.21	4.87	6.7	9.78	24.32	30.56	8.66	12.51	1.51	14.1	2.68	5.92	5.06	10.73	10.87	2.87	0.63	13.7	11.98	4.37	1.95	5.95	2.19	12.28	4.12	0.91	1.97	7.57	3.5	17.42	35.96	8.7	0.84	16.53	27.77	22.29	5.26	10.37	19.04	3.84	3.77	9.37	8.46	41.93
hsa-miR-130a-3p	112.81	46.3	165.04	17.43	80.48	16.76	52.95	14.78	112.01	18.38	59.41	20.11	81.39	51.99	59.93	55.09	49.61	142.21	97.46	63.93	78.44	14.58	104.37	23.3	112.95	12.08	57.53	28.25	188.62	14.59	66.97	29.77	117.25	68.83	87.33	81.93	76.19	53.79	284.1	309.37	124.5	12.42	108.99	113.95	105.54	27.61	92.44	39.17	142.35
hsa-miR-130b-3p	6.5	9.32	12.21	11.95	4.27	8.96	5.29	5.88	5.48	9.26	3.78	6.45	2.88	5.81	5.18	7.39	2.42	8	8.82	10.6	3.87	16.82	9.39	11.13	3.36	10.4	4.24	42.47	6.66	13.5	1.82	5.45	7.3	4.21	11.8	9.26	2.81	5.24	16.41	28.74	4.38	4.43	11.49	21.69	1.67	8	4.19	4.53	5.29
hsa-miR-130b-5p	6.97	14.76	16.3	7.53	6.04	25.68	10.22	7.75	8.19	27.17	27.42	45.62	13.95	27.51	12.92	48.49	9.42	22.77	31.07	112.2	23.83	52.41	17.41	9.02	3.96	35.5	14.88	25.53	32.11	21.08	3.36	15.31	24.67	12.54	57.19	8.05	7.93	15.23	18.54	54.98	8.77	99.12	36.1	87.23	9.71	34.26	7.79	14.35	5.58
hsa-miR-132-3p	5.02	8.47	3.26	7.8	3.83	8.68	1.38	3.19	7.66	4.19	3.48	2.93	5.41	14.04	2.52	9.84	2.75	16.67	7.84	21.87	5.87	12.39	19.05	18.89	34	120.14	4.93	6.97	13.46	16.43	6.85	10.85	7.83	9.56	2.81	22.42	6.07	12.81	5.64	3.38	13.7	7.53	3.81	13.52	20.32	22.78	6.8	14.16	5.34
hsa-miR-132-5p	19.65	41.34	33.27	72.77	28.47	51.59	14.37	25.71	37	25.15	17.71	14.52	24.73	56.86	15.58	46.23	34.88	142.48	36.7	104.35	52.27	55.72	49.02	28.57	51.67	165.34	22.69	31.78	54.53	42.72	31.16	51.7	52	39.98	22.58	87.51	22.69	117.83	23.44	20.18	61.29	26.36	35.45	100.48	87.21	66.1	56.16	59.22	28.17
hsa-miR-133a-3p	67.09	26.86	25.56	14.24	24.97	10.83	7.69	9.34	11.31	1.61	8.05	3.02	11.27	25.52	6.51	18.52	8.67	33.7	13.12	40.73	10.87	7.25	20.53	4.37	77.25	1.11	7.32	2.72	40.75	37.7	10.69	2.86	17.8	22.42	7.56	33.31	36.87	5.46	13.42	1.43	11.74	1.62	16.52	4.08	22.85	17.34	20.95	26.46	62.65
hsa-miR-134-3p	0.93	0.57	2.07	1.1	3.6	23.76	1.08	0.71	0.82	0.05	1.32	0.23	1.49	1.94	0.57	0.69	0.47	1.26	0.93	1.42	2.78	0.36	1.04	0.38	1.89	0.22	1.32	0.48	1.61	0.24	0.86	0.52	1.84	11.92	1.09	3.02	0.91	1.01	0.63	1.57	1.55	0.55	1.29	0.53	1.54	1.07	1.58	1.82	1.52
hsa-miR-134-5p	16.35	8.51	27.27	4.56	56.99	270.52	5.77	3.24	8.54	1.57	8.05	0.45	6.31	13.66	5.79	6.74	5.04	6.73	7.09	8.87	17.7	3.67	18.67	6.44	15.18	1.64	6.93	1.29	9.02	4.97	10.02	9.11	10.1	183.23	8.71	37.08	11.87	3.13	5.87	19.99	10.28	1.11	8.44	5.25	9.48	7.2	13.95	11.87	13.72
hsa-miR-1343-3p	1.39	1.99	2.48	3.29	1.92	5.23	1.68	2.69	0.59	1.93	2.89	12.67	0.94	3.02	0.66	1.39	0.51	2.53	2.66	2.31	1.91	6.84	1.09	3.38	1.75	5.4	1.61	1.15	1.56	2.08	0.001	1.74	1.66	1.85	2.41	0.93	0.95	4.01	0.69	3.05	1	1.15	2.81	2.23	1.04	2.7	0.99	1.82	1.57
hsa-miR-135a-5p	19.42	318.5	9.78	208.28	25.5	64.66	7.69	63.67	21.27	52.97	12.71	14.74	49.81	1380.67	4.7	263.31	13.43	436.25	25.13	107.63	27.53	749.24	71.02	39.37	57.42	600.04	6.39	7.92	36.12	33.67	11.74	469.14	28.91	463.72	10.14	35.78	15.63	78.57	11.4	156.56	26.76	4.34	15.12	91.94	22.76	241.9	13.26	823.71	14.74
hsa-miR-135b-3p	0.14	0.24	0.1	0.001	0.34	2.99	0.06	1.7	0.18	0.64	0.001	0.05	0.25	3.69	0.05	0.09	0.09	0.54	0.18	0.09	0.04	0.09	0.44	9.16	0.6	0.49	0.15	0.72	0.19	1.89	0.1	0.23	0.04	0.05	0.17	1.02	0.09	0.04	0.17	0.001	0.41	0.001	1.11	0.37	0.32	1.07	0.3	0.37	0.1
hsa-miR-135b-5p	15.66	22.09	13.81	23.22	30.77	292.83	9.92	251.83	51.73	53.24	16.63	7.53	66.59	546.35	25.78	12.51	17.02	85.88	25.31	11.14	27.87	8.05	60.21	862.35	89.02	119.74	11.42	112.61	15.77	103.86	12.46	27.66	29.08	25.64	18.91	68.3	12.5	28.17	14.23	6.8	33.52	3.92	33.11	76.57	17.34	93.38	35.7	98.21	17.49
hsa-miR-136-3p	18.82	16.41	51.84	16.93	95.29	742.08	39.01	12.53	45.9	3.36	35.66	2.3	15.99	30.48	16.62	11.73	5.74	28.19	19.06	38.06	34.96	5.37	26.53	7.33	21.95	3.19	8.59	4.87	31.92	17.48	23.78	16.48	16.23	256.79	17.65	52.57	18.16	23.28	38.3	11.43	53.21	8.31	28.83	11.19	40.37	25.47	35.4	25.94	37.13
hsa-miR-136-5p	6.55	3.41	7.45	3.19	8.05	68.21	3.01	1.04	7.54	0.78	3.58	0.36	2.43	3.36	2.75	1.66	2.52	7.05	3.1	4.21	4.39	0.76	6.17	2.16	6.53	1.06	2.59	1.96	7.08	1.71	1.53	1.46	5.07	32.55	6.3	14.75	2.08	4.23	7.78	4.72	8.59	1.25	4.63	3.39	3.25	4.88	7.94	4.39	5.24
hsa-miR-137	0.46	0.19	1.14	38.78	0.001	1.68	1.5	75.43	0.94	1.06	0.15	1.08	0.3	46.84	0.09	0.88	0.14	97.67	0.8	1.51	0.57	19.14	1.15	8.93	1.47	0.4	0.05	0.19	8.5	484.47	0.62	78.66	0.26	0.47	1.15	17.68	0.45	45.38	2.02	6.48	0.23	1.15	1.23	14.26	3.25	1.91	0.39	0.65	1.13
hsa-miR-138-5p	99.19	34.24	19.04	394.8	58.34	15.31	23.5	16.81	38.77	14.65	34.78	13.71	64.71	66.4	17.19	12.75	29.1	866.66	33.06	22.45	60.44	14.31	72.44	24.57	36.16	27.09	29.91	0.67	106.9	340.06	35.28	20.94	106.41	43.05	35.81	169.76	45.3	577.17	35.07	13.24	68.1	17.68	63.29	14.1	62.32	16.41	29.29	138.59	46.04
hsa-miR-139-3p	51.71	22.94	65.19	9.03	52.87	11.16	39.61	10.93	53.5	6.36	112.44	9.47	85.91	36.11	45.78	44.19	67.8	13.37	49.46	90.5	127.89	4.29	36.79	5.03	70.8	6.86	83.92	2.72	68.93	12.65	60.64	8.22	79.16	32.79	76.33	21.49	46.25	24.96	18.95	3.61	26.58	15.37	69.15	18.56	77.95	9.99	53.54	14.07	104.63
hsa-miR-139-5p	478.69	267.7	836.89	126.38	1061.67	223.36	675.89	152.67	869.78	122.38	1863.64	159.82	1103.6	366.66	1245.77	645.03	579.8	222.62	1746.95	1630	2361.78	98.26	765.94	127.79	1356.75	108.14	960.19	88.42	2139.56	92.12	1710.43	199.68	1309.23	523.33	1131.59	219.12	1455.93	683.42	1156.58	69.69	1022.64	366.58	1140.78	362.26	2346.26	260.81	588.44	218.29	1735.39
hsa-miR-140-3p	110.11	83.91	101.66	97.68	68.45	39.41	41.41	52.13	82.37	52.18	47.09	55.9	68.53	54.49	46.68	103.9	44.9	75.85	67.19	90.5	37.66	60.15	130.8	135.54	70.11	60.96	61.28	81.64	103.68	84.49	34.75	108.57	87.56	49.15	71.4	132.82	61.69	34.77	141.45	72.15	72.66	31.44	78.99	40.67	54.01	62.24	81.3	51.89	120.01
hsa-miR-140-5p	345.25	289.56	277.93	367.6	316.18	254.36	134.04	185.63	160.97	260.37	289.92	371.12	213.14	466.29	153	720.67	235.71	742.16	287.63	415.92	348.44	504.7	265.63	347.85	276.04	452.72	252.5	407.58	329.56	343.42	142.56	305.43	393.48	308.74	400.77	406.24	199.98	263.6	355.52	298.91	259.19	122.76	398.17	157.06	211	315.9	192.93	231.94	357.19
hsa-miR-141-3p	216.46	68.72	67.93	87.42	224.29	55.37	90.34	197.33	153.78	33.95	120.97	136.78	264.69	921.85	74.84	43.36	171.64	105.26	143.1	28.08	134.8	38.33	323.39	211.14	206.07	25.54	243.23	95.19	340.94	204.65	81.97	63.63	320.44	250.41	170.53	190.56	96.48	44.15	200.88	12.45	307.01	10.16	170.23	256	212.04	94.59	145.15	92.46	229.29
hsa-miR-142-3p	406.26	297.5	297.23	176.02	210.58	103.98	100.92	95.86	391.94	62.78	224.04	37.06	241.4	248.03	110.64	148.51	277.12	337.81	289.09	480.07	197.03	150.13	1035.77	258.12	471.76	891.8	272.17	157.08	530.32	182.53	78.9	120.5	319.96	204.19	425.98	465.64	121.8	56.82	619.06	117.41	185.61	32.73	485.6	130.97	117.11	218.33	250.02	254.89	391.67
hsa-miR-142-5p	217.25	136.45	82.99	66.43	86	40.85	38.71	35.32	133.93	33.16	100.86	15.55	119.93	110.03	43.31	59.2	139.56	99.83	121.08	200.53	97.49	43.2	302.21	93.21	148.51	226.2	158.33	30.11	192.64	76.54	21.38	23.34	185.87	113.3	167.21	284.63	33.61	12.37	358.98	62.98	83.67	7.8	183.18	45.92	30.44	50.34	138.45	83.44	194.22
hsa-miR-143-3p	21838.2	16102.7	12014.6	10159.8	31632.3	15146.4	11021.2	23166.8	20586.7	8676.91	17530.5	5325.84	14855.5	33275.5	9894.34	29818.2	7335.01	18288.7	14008.8	42086.7	17316.5	9665.87	17570.7	7049.56	44754.1	4319.47	12077.2	4092.14	39137	5397.47	11285.5	7243.24	24072.4	23856.7	9644.2	33561.4	26728	5067.77	11482.4	4139.94	23262.3	6295.79	11254	13628	37978.3	18634.4	24028.2	20757.8	35718.4
hsa-miR-143-5p	3.58	3.22	2.17	3.92	2.35	0.89	0.9	2.09	5.66	0.78	0.69	0.05	0.74	1.47	0.62	0.46	0.37	1.08	0.71	0.98	0.22	0.4	7.97	2.26	5.47	0.31	0.29	0.43	1.98	2.37	0.14	0.52	1.31	0.8	0.63	5.44	0.91	0.04	1.79	0.56	1.14	0.18	0.88	0.58	1.4	1.39	2.27	2.29	12.83
hsa-miR-144-3p	164.52	80.17	82.78	94.99	115.72	76.9	43.58	5.27	95.21	29.62	128.53	16.05	44.45	20.09	50.62	37.64	81.65	22.04	168.14	163.88	80.71	19.41	75.55	187.18	139.31	15.18	86.9	11.74	145.33	98.13	87.68	4.7	87.99	28.15	139.19	26.15	93.85	5.37	222.42	86.49	108.79	61.82	114.91	31.39	45.48	13.43	127.8	62.5	100.17
hsa-miR-144-5p	4.37	2.89	5.48	3.01	4.07	2.19	1.08	0.05	4.07	0.92	3.34	0.63	1.49	0.38	1.04	1.52	3.4	1.26	5.58	4.3	2.65	0.94	2.18	3.43	1.38	0.44	2.15	1.34	3.49	4.4	1.82	0.09	2.89	1.18	4.99	0.88	3.35	0.35	8.41	4.44	2.19	1.48	7.38	0.42	1.49	0.46	4.04	3.13	3.77
hsa-miR-145-3p	13.85	7.09	6.52	5.11	10.69	3.31	3.91	3.79	6.54	2.16	8.24	2.39	8.89	8.22	4.32	11.59	3.92	13.46	8.42	14.64	7.17	3.49	6.82	2.87	13.71	0.89	6.93	1.81	17.56	1.8	4.46	0.89	15.44	11.02	9.97	6.28	11.1	1.58	8.81	1.3	12.06	1.48	10.31	3.76	13.32	7.34	6.9	6.96	15.58
hsa-miR-145-5p	2316.37	456.75	560	623.38	744.53	228.68	242.47	467.06	388.7	93.82	132.45	33.41	216.92	468.51	256.75	216.58	139.66	677.93	215.17	275.99	135.1	251.25	560.52	250.41	1169.45	31.52	105.64	140.42	402.51	490.58	288.87	166.52	588.53	507.53	169.1	1052.81	881.45	99.03	467.36	133.05	768.16	33.38	209.49	167.72	379.13	232.04	329.94	278.82	1017.73
hsa-miR-1468-5p	12.64	14.05	27.32	2.28	29.62	20.82	17.19	5.22	16.79	4.1	69.46	353.67	33.12	8.93	27.87	32	27.65	7.63	38.51	42.28	76.1	13.91	11.19	2.54	8.65	3.76	55.43	31.06	25.59	1.42	8.72	2.25	50.12	24.08	46.07	1.63	26.68	102.91	25.63	18.65	13.06	153.74	46.47	21.69	28.23	4.28	16.96	14.63	34.24
hsa-miR-146a-5p	1891.49	1161.34	1466.69	1939.94	971.88	653.88	973.23	973.96	2836.48	951.81	1344.04	110.23	1823.81	2439.62	811.24	403.7	1207.34	1734.23	1421.21	483.93	886.81	842.04	3420.17	1387.43	2883.95	6225.99	1457.34	722.78	1169.05	1082.18	1980.65	742.64	1439.38	1042.26	1239.09	5116.14	1352.11	519.99	1617.89	657.93	3236.09	66.9	1076.91	1141.14	1439.4	854.31	1292.06	733.31	2068.33
hsa-miR-146b-3p	4.14	2.22	7.86	1.23	3.16	1.96	2.16	5.16	1.47	1.7	1.62	26.42	2.68	2.98	1.76	3.74	2.38	2.3	2.26	4.17	2.48	1.61	4.09	1.55	4	3.36	3.07	11.5	2.88	3.65	1.25	2.96	3.41	1.14	2.41	2.93	2.67	0.35	2.13	1.3	2.06	0.28	11.07	2.86	2.98	2.42	3.94	1.59	1.37
hsa-miR-146b-5p	737.85	799.8	2690.11	541.62	1338.44	870.57	841.96	1723.34	1005.59	1821.08	1070.6	10122	1210.17	1088.35	575.76	1391.61	468.63	650.28	1571.89	1583.51	981.6	867.13	1871.37	869.12	1508.66	2488.19	1012.59	8544.29	1311.73	1647.2	653.33	1670.21	849.1	708.83	770.31	1469.18	2372.53	122.8	700.15	760.25	2499.4	176.55	2050.87	1209.54	2076.59	1684.49	1224.66	997.13	417.05
hsa-miR-148a-3p	2946.43	1646.66	3062.61	2221.08	1519.21	1411.09	1713.73	458.55	1585.01	424.62	2493.57	1873	1529.78	706.76	2240.87	884.29	1434.47	2769.8	2450.87	934.63	1825.89	4038.41	1512.06	593.48	1153.77	1018.18	2311.41	2867.41	1650.83	153.41	1264.86	829.66	2720.79	1432.04	3195.31	826.52	1439.22	1325.24	4472.01	852.89	1205.51	2257.4	3660.49	1972.03	1355.31	881.13	1103.22	845.73	2290.52
hsa-miR-148a-5p	13.33	6.2	7.81	3.42	2.97	2.29	2.7	0.93	2.83	0.83	8.44	4.64	3.38	1.28	4.32	2.63	3.92	4.11	7.14	2.26	3.91	4.03	1.69	0.99	1.98	0.53	7.03	4.77	3.82	0.28	1.97	1.41	5.42	2.08	8.14	1.81	4.98	3.21	4.32	1.11	4.93	6.14	8.56	4.51	3.52	1.91	2.22	1.4	7.1
hsa-miR-148b-3p	57.98	122.41	104.51	84.91	68.93	128.26	68.94	72.79	94.74	168.07	68.92	65.78	42.31	105.21	48.96	46.18	25.51	111.22	68.38	81.59	58.96	206.35	103.88	249	86.91	167.11	41.77	239.96	52.13	99.65	23.3	77.3	44.08	70.92	49.45	67.69	54.9	324.83	121.87	70.67	62.8	63.76	77.23	94.22	50.81	96.41	43.29	74.74	63.24
hsa-miR-148b-5p	0.88	1.14	0.41	0.37	0.24	0.47	0.06	0.001	0.24	0.78	0.15	0.14	0.25	0.38	0.19	0.14	0.19	1.36	0.18	0.58	0.04	0.81	0.22	0.52	0.28	0.66	0.29	1.24	0.24	0.52	0.1	0.47	0.001	0.19	0.23	0.42	0.32	0.62	0.4	0.65	0.64	0.14	0.29	0.64	0.001	0.93	0.25	0.37	0.1
hsa-miR-149-5p	18.63	19.91	47.18	78.66	28.86	34.22	19.17	39.28	19.38	19.76	30.27	9.74	18.52	91.74	18.09	21.7	19.82	142.12	33.9	33.36	51.01	218.25	21.67	16.91	38.19	24.48	19.71	6.87	55.53	30.88	10.5	105.15	34.64	26.21	26.53	23.12	21.2	116.9	16.99	2.96	14.02	17.87	32.58	79.91	41.91	76.6	17.65	45.57	35.61
hsa-miR-150-3p	3.21	2.03	1.97	0.37	1.44	0.42	0.54	0.16	2.06	0.41	2.11	0.14	2.73	2.65	0.52	0.65	2.01	0.5	2.26	2.66	2.52	0.27	3.66	1.03	4.65	2.3	2.63	0.33	3.54	0.47	0.38	0.42	3.24	1.89	2.52	3.54	1.22	0.57	1.21	0.6	1.92	0.05	1.23	0.42	1.22	0.46	1.28	0.84	4.11
hsa-miR-150-5p	1209.81	1484.72	1225.08	261.57	1432.59	464.04	731.01	439.49	1909.31	210.31	2070.37	369	4178.35	2310.03	939.16	1314.73	1299.25	904.34	2180.74	5354.9	2278.42	290.79	5142.84	569.28	2513.27	2831.66	2314.19	235.81	4394.08	149.1	126.89	106.74	2619.37	1725.21	1749.36	2150.23	173.89	126.37	1316.86	348.28	617.53	110.43	1549.97	681.1	471.76	296.75	1712.03	1567.49	2701.06
hsa-miR-151a-3p	58.49	156.6	149.57	228.81	119.89	209.87	71.17	134.32	47.67	102.9	102.67	408.9	39.58	73.3	71.99	95.41	28.21	91.3	40.2	40.24	94.75	326.79	172.72	296.93	232.24	341.7	139.3	369.88	40.61	55.98	104.02	288.43	181.15	303.06	148.81	118.26	100.24	183.01	146.69	199.78	96.05	173.59	182.47	407.7	149.12	214.19	68.24	153.18	135.15
hsa-miR-151a-5p	445.47	2580.98	676.92	507.44	1129.16	2166.52	484.15	729.49	667.62	2475.07	1348.9	5479.25	1164.08	1649.4	631.84	1640.06	606.7	1201.54	1317.15	2635.97	1570.72	2834.48	732.53	970.08	1322.1	2937.01	868.17	1419.13	1539.12	475.99	582.24	1836.12	1121.61	2786.78	838.84	362.41	1146.74	2325.03	544.08	1474.63	809.12	1747.56	1217.84	4505.59	1370.26	2138.21	543.77	2195.63	697.28
hsa-miR-151b	1196.84	3874.19	1754.03	1954.86	1476.64	2332.08	1016.39	1919.13	1380.38	4240.97	2166.32	8480.23	2077.97	2842.82	1510.79	2581.75	1343.69	2188.86	2149.45	5349.22	3260.81	6488.37	1709.08	2315.88	2777.45	4327.7	1810.99	2899.9	2574.55	1222.32	1134.57	4411.97	2470.5	4171.27	1594.13	1137.48	1903.18	4152.61	1024.23	1466.4	1781.48	3870.57	2094.7	6461.97	2503.06	2492.64	1159.97	2338.43	1835.42
hsa-miR-152-3p	301.25	142.55	261.12	285.2	148.22	58.92	151.65	105.86	117.02	98.98	214.28	412.15	157.12	112.81	117.24	208.31	146.09	532.38	212.15	237.48	194.29	253.18	153.45	77.76	160.43	128.73	161.65	209.04	206.57	151.08	81.59	224.85	170.56	99.25	236.66	146.13	210.99	204.84	195.76	38.6	127.74	27.01	325.04	40.88	168.27	176.31	91.01	73.67	143.82
hsa-miR-153-3p	28.81	33.01	14.95	86.82	15.24	9.94	6.97	4.07	9.72	7.55	9.91	9.78	7.25	10.16	9.97	38.1	16.27	197.41	21.89	39.8	30.31	25.22	13.43	6.39	16.61	13.32	18.35	14.22	41.22	69.05	6.14	29.87	29.74	29.43	21.95	41.45	12.23	202.78	30.7	16.85	11.83	7.85	26.13	27.84	27.01	8.09	22.38	15.99	28.17
hsa-miR-1537-3p	4.6	9.13	6.67	5.7	5.85	4.25	5.17	6.1	11.73	4.47	4.27	2.8	3.63	14.65	2.56	5.77	3.64	12.02	4.08	14.95	4.22	12.61	14.03	4.09	5.7	10.23	3.17	7.3	7.65	9.09	4.51	10.8	5.12	5.77	4.41	11.4	3.44	7.88	5.93	2.92	7.12	8.22	6.97	4.93	4.92	15.53	5.18	4.63	8.03
hsa-miR-154-3p	4.55	4.97	9.93	2.87	37.87	256.93	2.82	1.92	5.42	0.64	2.26	0.36	2.09	5.15	1.52	2.22	1.73	8.99	2.79	3.82	3.39	0.98	2.62	2.11	2.35	0.97	1.32	1.34	3.68	1.23	2.21	4.98	2.67	107.39	2.75	10.75	2.67	2.46	2.82	25.17	5.02	0.6	3.52	1.33	2.21	4.56	6.21	11.08	2.5
hsa-miR-154-5p	106.58	57.99	222.16	52.33	165.04	1309.68	99.6	40.32	151.19	15.38	62.45	8.21	69.33	155.54	57.03	60.26	43.13	98.07	47.91	100.04	114.45	19.86	93.67	25.51	101.86	21.87	54.31	24.95	77.67	31.64	77.95	52.08	81.39	1084.65	67.21	293.6	62.28	77.99	87.14	82.74	111.17	16.62	58.54	35.79	67.47	54.38	133.96	103.35	115.21
hsa-miR-155-5p	324.53	416.79	228.21	360.62	326.2	281.12	172.68	627.09	909.9	203.63	208.49	60.32	547.4	859.6	172.75	252.19	483.27	289.75	285.94	718.44	289.04	432.02	1024.53	565.33	1054.57	4566.65	574.44	263.53	431.97	584.16	260.06	466.42	448.49	325.53	258.43	2616.34	244.46	107.75	283.47	347.45	643.88	53	204.45	298.05	429.58	594.47	842.9	640.99	451.78
hsa-miR-15a-3p	6.78	4.11	5.38	3.56	3.98	4.58	3.37	2.69	5.66	4.93	5.69	3.92	2.63	1.51	2.71	1.85	3.26	3.43	3.06	4.84	3.61	1.83	3.44	2.72	1.43	0.75	2.63	1.24	2.46	5.3	1.25	5.17	4.55	3.26	4.47	7.26	3.4	1.41	8.81	5.65	2.24	3.09	7.56	2.17	2.57	2.51	2.91	4.58	5.54
hsa-miR-15a-5p	699.52	494.68	779.16	780.24	652.54	340.88	599.67	456.52	1056.2	626.54	746.39	967.38	607.29	676.32	508.66	575.3	365.86	517.38	785.5	1180.72	530.2	1090.07	1094.13	650.42	721.48	1030.84	512.96	597.62	864.09	820.07	446.77	761.28	611.62	455.54	677.08	781.21	608.63	220.65	1047.27	219.59	1144.86	1346.73	983.86	392.65	685.33	813.91	641.1	631.41	1001.03
hsa-miR-15b-3p	4.79	18.49	8.17	19.76	8.53	31.05	5.11	10	6.78	23.86	6.82	9.69	4.97	24.81	4.46	10.76	3.78	31.26	9.53	12.02	7	60.91	7.37	40.73	6.72	13.24	5.56	28.29	5.85	25.86	4.17	16.95	5.25	12.44	5.1	11.17	5.48	14.74	10.08	15.92	8.54	5.54	8.85	14.37	6.37	30.4	5.67	21.69	5.05
hsa-miR-15b-5p	370.81	869.94	472.98	695.97	48.94	108.69	279.85	392.68	467.83	1033.56	27.52	42.87	418.88	1188.88	211.64	446.6	285.56	1096.42	610.71	838.36	407.01	1530.54	550.42	1392.03	579.5	924.29	416.88	1021.66	524.56	953.68	377.5	730.57	569.03	603.99	346.9	435.64	515.6	394.64	632.89	177.94	790.35	494.74	500.89	486.71	691.93	1218.82	44.03	86.57	311.54
hsa-miR-16-2-3p	0.33	0.85	0.31	0.78	0.19	0.42	0.24	0.6	0.12	0.51	0.39	0.27	0.1	0.43	0.14	0.88	0.23	1.22	0.62	1.46	0.35	0.98	0.27	1.13	0.46	0.53	0.49	0.52	0.47	1.04	0.1	0.47	0.44	0.33	0.06	0.14	0.09	0.62	0.29	0.83	0.001	0.28	0.59	0.42	0.18	0.6	0.3	0.33	0.1
hsa-miR-16-5p	7744.96	8291.39	7495.48	11999.2	4818.67	3793.4	5476.59	5530.06	10821.6	10357.2	5667.7	8062.72	6567.99	9630.84	6040.06	9552.05	5711.78	9418.55	9258.08	13740.3	8558.67	19694.8	8740.38	10741.9	7349.21	10906	7194.91	9582.75	8134.09	11559.3	4065.76	8336.59	8186.38	6363.9	8212.18	7897.86	6939.58	3205.2	8365.57	3120.4	8468.31	11164.9	10627	3457.98	7961.74	8563.65	2974.06	3695.91	10556.3
hsa-miR-17-3p	20.54	21.76	16.87	41.29	10.88	17.42	7.15	8.52	13.91	18.06	17.02	22.63	8.29	10.35	15.01	14.32	8.91	27.33	14.85	13.93	13.35	8.05	13.37	13.06	9.8	15.98	12.39	11.98	15.53	10.99	6.52	4.79	14.61	30.61	21.09	9.77	10.92	6.82	19.52	12.73	11.51	13.99	42.78	41.31	10.57	10.51	5.47	33.42	21.55
hsa-miR-17-5p	264.32	520.56	162.4	1491.13	146.83	199.27	66.48	84.66	196.56	272.53	152.86	371.89	120.52	186.64	186.71	237.82	142.64	935.78	208.47	155.85	192.55	212.25	222.72	374.73	149.06	526.38	163.16	263.34	154.68	215.4	74.59	112.42	213.12	476.07	212.99	149.29	203.56	216.02	367.33	1729.95	137.34	115.79	485.31	597.37	116.38	212.66	98.41	511.65	261.96
hsa-miR-181a-2-3p	9.29	19.82	8.02	6.43	22.39	34.46	7.21	7.75	6.72	9.81	40.77	35.66	14.3	51.47	10.11	46.69	15.99	58.27	39.53	53.59	62.83	11.58	7.53	4.7	8.47	5.67	18.1	7.25	60.95	3.13	7.29	11.93	36.47	38.75	28.31	2.93	35.01	21.92	20.62	15.55	30.14	38.04	36.1	43.59	41.68	21.01	11.09	31.74	8.08
hsa-miR-181a-3p	13.61	18.49	24.83	14.33	22.1	17.28	11.06	22.63	26.63	11.56	18.84	7.48	15.79	37.62	8.93	30.34	12.26	18.25	24.82	45.21	31.87	14.62	29.37	11.28	30.96	45.68	15.76	9.97	41.69	12.6	17.4	34.66	29.3	21.24	17.31	30.15	12.23	15.01	14.86	6.71	26.4	9.28	23.5	16.6	33.92	22.64	18.44	24.31	23.56
hsa-miR-181a-5p	4380.93	4300.57	5193.55	5243.39	4923.46	5597.48	3019.17	7082.82	3758.05	2746.86	4298.3	2653.65	5086.48	10512	2918.53	5262.83	3679.42	7996.7	5473.49	8231.41	5814.75	2730.59	6202.42	4537.43	8037.99	12197.4	5493.61	2312.63	9173.77	3011.8	3962.7	11761.5	7818.14	7024.71	4220.61	13408.7	4233.63	4112.03	3246.96	2237.93	7210.73	2429.24	5293.08	8358.81	8675.48	4855.26	4936.55	5076.89	6647.03
hsa-miR-181b-2-3p	0.28	0.47	0.52	0.41	0.86	0.47	0.3	0.49	0.47	0.28	0.69	0.41	0.25	1.13	0.28	1.25	0.42	1.17	0.62	1.11	0.52	0.001	1.31	1.17	0.69	0.49	0.59	0.14	0.94	0.71	0.24	0.56	0.7	0.8	0.8	0.84	0.68	0.22	0.52	0.37	0.73	0.28	0.59	0.8	1.45	0.93	0.64	0.93	0.54
hsa-miR-181b-5p	732.79	944.2	653.64	952.2	646.5	984.96	404.75	943.08	647.36	577.44	477.56	323.6	874.36	2241.41	586.06	1172.72	693.34	1328.84	774.07	1255.87	998.78	767.49	1410.47	1276.5	1293.86	2511.17	754.63	315.49	1423.07	684.43	530.04	2657.19	1194.34	1380.28	688.59	2283.38	671.1	732.93	582.55	734.1	1030.09	272.16	740.91	1676.21	1213.28	1247.13	924.99	1198.13	949.25
hsa-miR-181c-3p	3.3	2.18	1.45	5.2	2.01	2.24	1.26	1.32	1.53	0.64	1.62	0.45	0.94	5.44	0.76	1.62	0.75	3.16	1.6	3.68	1.87	1.74	1.8	0.75	0.55	0.84	0.68	0.24	3.02	3.27	1.05	3.52	1.84	1.99	1.83	2.7	0.77	1.45	1.56	0.28	1.92	0.51	2.17	1.17	2.12	2.56	2.17	2.2	1.71
hsa-miR-181c-5p	127.68	110.68	67.98	376.45	96.25	101.32	50.49	89.38	122.02	40.44	59.75	21.82	95.79	289.95	60.16	138.17	69.43	252.21	104.59	263.04	137.58	120.71	179.98	112.05	144.65	135.72	80.46	26.24	271.58	228.85	85.76	333.94	168.46	180.1	92.26	303.37	90.68	102.77	105.68	32.95	182.78	27.01	111.45	196.93	170.08	186.81	116.46	164.54	144.26
hsa-miR-181d-5p	22.58	17.78	8.12	63.88	14.57	17.18	5.83	15.22	10.84	7.23	6.77	2.93	11.97	56.57	8.17	20.64	11.89	32.75	17.46	22.49	20.18	23.75	26.37	18.65	24.29	17.62	10.25	5.73	28.85	47.5	8.48	62.88	26.37	28.15	14.84	40.47	14	23.2	17.28	7.13	20.37	1.94	16.76	17.82	21.77	28.12	16.07	28.79	20.18
hsa-miR-182-3p	0.09	0.76	0.05	0.32	0.05	0.47	0.001	1.65	0.18	0.23	0.15	0.14	0.001	4.77	0.001	0.05	0.001	0.81	0.18	0.13	0.001	2.24	0.001	0.05	0.18	1.11	0.1	0.001	0.24	0.05	0.001	1.64	0.31	0.38	0.11	0.28	0.09	0.09	0.12	0.05	0.14	0.92	0.41	2.17	0.05	0.19	0.001	0.42	0.001
hsa-miR-182-5p	12.27	176.33	17.59	183.5	27.66	107.2	4.81	152.39	36.47	102.71	11.53	26.87	22.74	1022.33	4.27	6.56	11.94	193.03	67.67	39.26	34	1096.73	56.34	64.32	58.24	636.96	17.61	15.03	40.09	109.69	28	673	26.63	64.48	50.25	87.97	28.85	50.84	14.69	18.97	35.08	136.2	102.9	144.92	42.81	149.49	26.33	133.45	1.22
hsa-miR-183-3p	0.001	4.07	0.26	1.64	0.19	1.4	0.06	5.99	0.41	1.52	0.2	0.32	0.1	14.65	0.14	0.09	0.14	2.85	0.84	0.71	0.3	12.25	1.09	0.19	0.28	9.07	0.2	0.43	1.04	0.38	0.1	3.52	0.52	1.61	1.09	0.42	0.09	1.36	0.23	0.6	0.32	3	2.11	6.47	0.32	1.72	0.15	4.21	0.001
hsa-miR-183-5p	9.76	184.22	12.88	108.82	18.69	77.69	7.27	229.85	16.2	57.8	12.56	26.19	7.15	657.32	3.7	4.48	13.1	181.37	39.84	33.14	36.83	704.74	28.55	18.51	26.13	357.76	13.13	12.6	31.26	39.88	13.28	295.06	23.84	64.48	33.64	40.85	14.18	46.92	14.11	13.61	23.93	125.35	57.54	363.91	27.01	78	15.43	139.06	3.33
hsa-miR-184	0.28	2.03	0.26	1.92	0.14	1.17	0.18	0.6	0.001	0.78	0.1	5.45	0.1	0.47	0.001	0.42	0.19	2.67	0.44	1.69	0.57	2.33	0.001	0.99	0.32	1.46	0.24	0.43	0.28	0.38	0.1	5.68	0.48	4.45	0.52	0.74	8.56	4.23	0.17	51.51	0.23	0.001	0.18	0.9	0.001	3.44	0.2	1.78	0.1
hsa-miR-185-3p	0.93	0.8	0.21	0.82	0.14	0.37	0.3	0.11	0.12	0.51	0.1	0.27	0.1	0.43	0.001	0.46	0.42	0.77	0.4	0.75	0.26	1.12	0.33	0.28	0.46	0.53	0.54	0.29	0.38	0.66	0.19	1.03	0.39	0.38	0.23	0.7	0.23	0.35	0.12	0.23	0.27	0.23	0.94	0.85	0.05	0.33	0.35	0.23	0.34
hsa-miR-185-5p	374.57	528.17	479.86	760.98	98.75	148.52	267.89	377.9	280.87	805.76	105.62	111.71	304.42	499.61	202.95	350.5	265.93	531.74	446.07	685.03	354	1236.98	299.69	384.92	474.29	711.15	298.07	482.82	506.86	553.9	272.47	1471.14	325.12	501.62	369.42	557.43	405.08	441.34	238.89	404.79	448.86	271.33	390.03	691.07	276.21	581.55	380.28	448.88	272.54
hsa-miR-186-5p	132.51	290.17	157.38	111.05	49.52	56.96	58.12	75.7	138.7	81.34	37.23	109.64	61.63	92.59	49.34	86.96	72.98	178.75	59.96	102.44	48.35	177.86	195.76	286.68	123.99	243.78	93.83	226.55	66.38	90.89	23.2	61.38	70.98	69.59	131.68	124.45	46.34	67.69	150.2	55.9	55.31	56.69	115.38	63.89	54.51	144.56	75.68	83.11	111.93
hsa-miR-187-3p	33.13	180.68	19.45	100.6	24.73	51.87	25.3	6.87	23.39	10.46	35.17	1.31	22.55	37.72	25.02	15.33	18.42	98.75	17.42	18.32	30.05	330.9	15.61	34.06	12.79	6.91	20.93	0.81	27.29	11.32	16.97	10.57	29.83	28.57	38.62	25.54	26.45	60.39	20.79	4.63	12.83	2.17	15.88	6.04	21.68	73.12	11.69	8.32	36.1
hsa-miR-188-3p	0.46	1.14	0.78	0.87	0.58	0.65	0.3	0.55	0.65	0.55	0.49	0.41	0.35	0.24	0.14	0.23	0.19	0.5	0.75	0.58	0.22	0.04	1.31	0.8	0.6	0.27	0.59	0.19	1.27	1.14	0.05	0.23	0.44	0.24	0.86	0.93	0.41	0.09	0.46	1.53	0.37	0.18	1.11	1.27	0.36	0.88	0.3	0.79	0.88
hsa-miR-188-5p	6.41	18.97	8.23	10.63	6.09	7.47	3.31	4.28	12.49	21.19	3.68	2.84	4.57	3.83	2.28	3.51	2.61	10.12	3.01	4.7	2.17	6.4	17.74	19.78	7.68	5.44	3.85	2.82	5.52	10.7	1.25	8.69	4.11	6.77	4.93	13.86	3.76	1.32	5.01	29.15	3.79	2.22	6.04	20.52	2.44	8.74	2.91	9.77	8.18
hsa-miR-18a-3p	3.81	11.11	3.67	7.67	1.53	4.2	1.02	2.36	1.24	7	0.83	1.4	2.48	4.68	1.47	1.71	1.82	6.05	2.13	1.73	1	2.73	3.88	10.34	3.27	11.02	0.88	1.19	2.6	5.87	0.58	3.05	2.01	8.56	3.09	3.77	1.81	1.8	2.3	25.04	1.92	1.06	13.01	24.13	0.63	5.39	1.18	12.11	1.86
hsa-miR-18a-5p	27.37	174.91	29.49	117.94	36.72	119.85	17.43	16.48	31.76	82.68	25.9	63.39	19.02	59.17	19.23	44.93	21.26	160.68	31.2	43.39	26.31	38.1	34.06	52.53	20.7	216.33	17.96	27.82	27.43	35.05	16.97	34.75	24.1	175.37	29.4	32.43	39.91	50.7	43.25	392.66	32.52	24.88	122.47	335.01	21.95	139.77	20.12	226.19	24
hsa-miR-18b-5p	0.23	0.8	0.93	4.75	0.91	2.05	0.12	0.38	0.77	0.41	0.49	0.77	0.74	1.13	0.14	1.66	0.42	3.03	1.11	4.21	1.17	20.66	0.71	0.61	1.47	22.8	0.63	0.33	1.04	0.85	0.81	2.25	0.52	0.43	0.97	0.93	1.22	2.24	0.58	0.51	0.82	0.55	1.23	1.11	0.59	2.42	0.89	2.62	0.73
hsa-miR-1908-5p	0.65	4.73	1.81	3.38	4.94	14.05	1.2	2.64	0.18	1.89	7.11	1.67	1.39	1.51	1.04	2.4	2.24	3.88	2.57	1.51	1.96	4.25	0.6	1.83	1.52	1.2	7.51	1.43	1.37	0.62	0.001	3.33	1.75	3.17	7.51	1.21	0.95	1.06	0.46	16.24	1.42	0.6	2.34	27.57	1.45	6.55	0.84	1.4	1.37
hsa-miR-190a-5p	15.38	39.26	20.49	48.41	14.91	7.84	5.23	6.43	8.13	12.39	17.02	13.89	4.87	19.85	7.41	18.61	9.61	80.5	13.3	33.81	10.18	15.83	6.55	11.98	8.93	17.09	11.12	12.84	17.56	11.98	5.13	23.62	7.96	11.64	18.91	12.84	14.4	43	15.78	72.01	6.17	3	16.7	13.31	6.68	5.44	11.93	7.85	21.55
hsa-miR-190b	3.72	9.27	5.12	8.12	2.73	13.77	0.78	3.3	1.83	13.91	2.85	12.98	3.92	19.47	1.9	5.96	2.24	13.69	3.59	5.15	6.87	174.19	3.44	12.5	5.43	5.49	2.83	11.45	3.82	10.56	1.68	124.87	3.11	7.85	2.69	10.19	2.85	8.93	1.9	4.3	4.02	1.75	2.75	2.65	3.12	21.85	4.83	7.95	2.4
hsa-miR-191-3p	0.74	1.8	1.45	0.09	0.86	3.27	0.42	1.15	0.41	2.76	2.06	1.85	0.3	0.95	1.04	0.79	0.93	1.85	0.75	3.64	2.52	3.85	0.16	0.23	0.41	0.71	1.51	1.77	0.57	0.57	0.14	0.33	1.22	0.71	1.49	1.07	0.5	2.02	0.75	1.48	0.37	0.42	2.34	1.59	1.22	0.65	0.49	1.26	1.03
hsa-miR-191-5p	4018.44	10548.3	8534.56	5048.16	8930.83	10626.8	5356.02	5486.05	7588.09	18899.5	11544.3	19892	9341.65	8917.14	5926.57	11858	5261.29	10373.8	11101.9	16648.4	10132.6	27323.4	5016.47	12054	8527.59	19235	8877.53	16209.1	11974.6	6067.5	3406.77	5357.06	8876.46	10429.4	8049.27	5657.99	7189.02	11369.4	6797.14	12883.1	5760.79	11511.8	8907.4	16357.5	9046.53	22817.3	6133.85	10687.8	6596.38
hsa-miR-192-3p	88	84.24	135.14	82.44	49.71	34.46	69.48	10.71	72.18	68.17	74.32	107.79	70.32	34.6	108.5	135.26	45.37	110.27	88.24	30.43	132.97	180.86	51.81	94.81	41.18	47.14	77.39	138.47	53.45	13.78	24.5	14.6	91.62	81.66	103.14	12.14	53.99	72.67	134.36	160.95	73.53	248.25	136.65	24.82	101.8	70.05	36.24	34.68	83.71
hsa-miR-192-5p	24468.4	35580	37911.7	22444.5	27278	22297.2	21481.5	3085.58	29368.9	34908.1	45904.4	53913.3	27715.4	17488.7	38937	59815.3	24802.1	26797.4	52108.8	27154.2	51835.8	71050.9	16917.3	33489.7	19107.6	24726.7	38484	42735.4	29927.7	4520.75	22805.5	10028.9	34701	39753.1	32576	4157.86	43561.5	52330.3	33055.6	85684.2	33613.5	91134.4	35854.8	16386.4	38307.8	38102.3	20646.7	24218.4	27776.5
hsa-miR-193a-3p	151.79	82.53	30.16	88.74	22.72	28.81	20.08	47.52	41.72	38.18	19.97	45.71	26.42	22.87	23.22	39.21	19.86	72.1	26.59	22.58	17.22	33.9	40.07	79.07	32.9	59.05	18.69	53.3	58.07	360.66	21.38	21.32	36.43	40.5	38.62	72.85	43.85	44.54	41.41	170.21	34.48	30.42	37.85	70.95	27.5	27.05	19.77	25.99	46
hsa-miR-193a-5p	368.81	82.53	125.62	314.31	147.64	150.2	99.78	228.64	12.49	240.01	373.86	214.59	193.48	304.23	78.59	443.28	182	446.64	213.97	263.48	326.26	250.98	75.82	151.05	155.64	295.84	263.04	140.33	220.78	198.73	78.9	195.87	282.13	221.03	312.18	85.37	213.7	534.69	58.74	289.56	130.62	202.36	305.06	229.6	119.27	94.92	82.19	57.31	158.17
hsa-miR-193b-3p	1236.57	669.12	1190.98	691.91	944.13	987.06	521.66	696.31	362.18	259.77	1021.84	3325.25	294.09	1091.47	654.77	2609.41	639.76	577.19	886.86	457.09	725.7	749.51	403.91	673.86	505.02	847.93	649.33	902.28	500.1	1404.62	528.22	600.11	742.04	381.83	896.66	246.1	697.28	894.64	193.63	306.13	596.8	2596.04	1584.31	370.91	392.73	1312.49	345.62	317.34	584.18
hsa-miR-193b-5p	20.44	4.73	18.63	15.33	8.15	3.27	3.31	5.38	2.53	2.49	24.92	13.16	4.07	8.74	11.21	20.46	13.24	3.66	17.55	11.22	19.39	6.62	4.2	7.33	5.98	6.37	26.88	15.55	9.44	15.35	3.83	5.21	15.39	4.31	21.26	5.35	14.45	12.68	11.58	3.24	7.86	15.74	22.38	2.81	5.87	9.02	7.3	1.92	6.66
hsa-miR-194-3p	42.93	23.93	38.91	16.56	29.67	13.31	25.06	3.57	9.96	20.31	81.68	52.3	17.08	15.93	39.56	58.65	31.62	23.76	68.3	30.26	75.57	43.52	10.48	20.53	15.14	11.51	52.89	19.23	39.76	2.75	8.72	5.35	46.4	23.51	60.05	3.77	39.5	51.01	25.97	48.36	24.75	76.64	79.81	9.7	28.54	17.25	12.28	11.59	23.9
hsa-miR-194-5p	12779.2	13172.9	16083.5	12929.8	1591.25	1733.34	12032.8	1988.9	18567.3	14393.2	2330.12	2279.2	16297.7	7836.39	9761.9	6234.72	9242.59	11121.8	19443.4	6875.32	9636.33	14794.4	10161	18440.3	7627.51	6760.03	17205.8	22347.5	10201.8	2666.06	11530.1	6621.11	12568.6	13427.4	14779.9	2682.26	24345.1	26204	14876.1	16152.3	17718.9	38520.7	7871.15	2859.29	15931.6	17705.2	830.67	855.4	6405
hsa-miR-195-3p	8.04	5.53	12.83	2.42	10.02	4.2	8.29	3.19	7.01	1.34	11.68	6.81	8.44	7.28	7.36	18.75	11.61	10.39	11.97	26.84	18.18	7.29	6.5	2.21	13.53	2.17	10.49	13.65	21.06	1.8	5.9	1.93	20.9	11.87	9.86	6.98	13	4.31	12.21	2.04	11.65	6.97	11.37	2.97	22.08	3.35	11.69	6.31	5.93
hsa-miR-195-5p	1205.76	407.89	600.87	190.12	312.34	77.5	270.84	77.51	728.9	85.9	266.42	134.89	576.6	288.91	331.64	311.99	460.05	673.09	543.17	689.91	385.83	209.93	910.49	178.34	1139.04	139.93	483.73	708.18	1132.22	139.01	235.27	80.3	895.33	591.83	626.94	733.52	521.3	48.28	819.03	56.23	748.93	153.05	512.38	149.63	844.35	184.26	393.94	231.47	2393.44
hsa-miR-196a-5p	2.09	178.45	2.64	163.93	1.58	1.12	3.19	20.6	4.3	1.24	5.94	0.32	3.13	11.25	1.9	1.94	3.5	1.72	1.73	33.5	1.3	1.97	6.77	16.58	4.65	123.19	5.71	1.15	4.91	41.16	2.16	74.39	1.27	1.14	13.52	15.96	2.36	1.41	7.14	2.78	6.21	1.62	7.03	2.86	2.98	22.78	2.51	32.25	2.89
hsa-miR-196b-5p	20.35	132.1	13.45	591.99	9.68	13.77	6.19	390.04	9.72	849.74	15.75	2.43	14.9	170.66	3.75	10.58	11.47	713.25	10.95	74.09	15.09	11.23	23.25	143.3	42.97	13.86	10.1	13.41	11.57	81.75	23.49	1800.76	13.86	11.83	16.33	108.82	9.29	637.77	9.73	15.23	30.37	7.39	4.63	655.38	9.62	359.13	9.96	85.26	10.58
hsa-miR-197-3p	134.09	196.28	154.54	249.11	60.83	117.94	44.66	110.26	41.6	79.87	56.76	92.55	50.55	137.96	31.82	83.12	78.57	294.35	95.37	147.56	39.83	193.07	131.83	289.93	84.1	171.31	84.95	192.72	93.01	135.03	23.63	95.85	91.23	114.49	107.44	107.19	44.89	64.79	74.24	171.83	37.31	45.24	120.42	110.08	28.09	82.09	60	77.92	103.94
hsa-miR-197-5p	0.42	1.61	0.31	0.87	0.34	0.23	0.24	0.27	0.12	0.23	0.2	0.18	0.05	0.38	0.24	0.69	0.33	0.27	0.49	0.89	0.48	1.16	0.87	1.22	0.46	0.27	0.78	0.1	0.24	0.62	0.19	0.38	0.83	0.28	0.46	0.65	0.36	0.09	0.12	1.06	0.59	0.32	0.76	0.53	0.5	0.7	0.74	0.09	1.08
hsa-miR-1972	0.56	0.95	0.47	0.5	0.34	0.98	0.3	0.33	0.88	0.32	0.1	0.14	0.1	0.57	0.19	0.55	0.23	0.32	0.18	0.13	0.13	0.27	0.55	0.8	0.14	0.84	0.15	0.24	0.05	0.24	0.24	0.52	0.17	0.14	0.11	0.47	0.05	0.001	0.12	0.28	0.14	0.18	0.35	0.32	0.36	0.65	0.3	0.09	0.29
hsa-miR-1976	1.02	1.32	1.97	0.91	0.58	1.03	0.42	0.88	0.77	0.37	0.74	0.77	0.84	1.47	0.09	1.85	0.93	0.9	0.4	0.67	1.13	2.64	2.18	0.75	0.83	2.66	1.56	0.62	0.66	0.76	0.24	1.5	0.92	0.66	1.09	1.02	1.09	0.84	0.75	0.79	0.78	0.88	1.35	1.17	0.63	2.14	0.54	0.93	0.73
hsa-miR-199a-3p	705.33	1455.86	1966.93	573.37	762.84	1191.56	1283.92	291.71	843.03	221.82	503.46	3.56	2767.75	16.45	1257.64	1072.56	427.6	1832.75	85.93	1877.78	1652.87	377.06	4661.42	210.81	321.91	151.66	1234.11	1.1	1606.83	694.14	2099.59	105.66	928.08	126.79	1410.88	218.47	99.38	64.88	1877.98	4.16	4628.53	187.95	989.13	1061.97	1876.71	47.13	160.14	2197.5	149.94
hsa-miR-199a-5p	934.71	644.9	1046.84	192.81	1278.57	559.29	593.42	371.48	960.63	60.06	810.7	73.71	646.18	885.74	673.72	772.58	501.5	1086.52	1171.79	1088.49	1182.98	270.44	1323.13	149.87	1828.41	113.1	659.87	30.87	2691.74	102.44	646.62	701.55	1613.66	1143.22	1199.15	1011.82	837.6	51.06	1323.88	64.6	1188.48	72.76	1086.87	301.66	1887.36	555.38	1098.74	1162.46	1766.1
hsa-miR-199b-3p	2077.14	42.62	69.33	158.96	1801.11	315.81	452.48	1116.51	3119.41	62.64	1131.87	93.05	97.88	4817	526.14	11.36	1210.09	59	2664.17	69.52	656.08	129.7	75.22	843.89	8349.96	406.72	473.58	116.23	4624.54	156.29	732.76	3287.73	2940.69	2921.47	62.57	6933.5	2511.36	29.23	687.77	142.49	1597.74	7.53	429.46	250.12	6152.69	1661.39	3915.76	689.23	5260.35
hsa-miR-199b-5p	27.97	7.28	7.92	7.44	20.76	30.02	5.35	15.99	20.03	2.76	2.26	0.45	7.3	99.35	5.08	8.4	3.68	87.91	9.31	3.42	7.78	8.14	37.07	23.44	38.23	3.5	2.34	0.52	25.83	24.2	12.56	96.55	7.13	7.9	4.7	274.2	4.67	0.22	19.98	1.16	31.74	1.75	2.7	13.1	17.84	20.87	37.82	47.3	38.11
hsa-miR-19a-3p	39.31	50.37	20.54	77.33	22.67	17.56	12.74	10.44	28.75	21.05	25.66	35.89	14.55	19.8	21.7	21.52	14.08	78.56	27.17	22.63	13.35	7.51	38.1	37.54	18.4	56.62	12.73	34.74	27.95	21.46	10.83	10.57	22.48	63.3	22.63	15.68	16.9	13.38	123.13	65.11	27.17	15.24	55.79	57.8	18.88	21.06	11.39	44.59	46.04
hsa-miR-19b-1-5p	5.2	2.32	3.05	9.9	2.25	1.21	1.26	1.32	2	0.83	3.24	2.52	1.54	1.37	2.8	3.51	1.73	4.52	2.75	1.73	2.17	0.54	1.31	1.03	1.43	1.15	2.2	1.48	2.03	2.27	1.1	0.66	3.24	3.26	4.3	0.88	3.03	1.85	4.61	9.44	2.06	2.72	7.03	1.91	2.26	1.81	1.04	1.78	4.41
hsa-miR-19b-3p	2260.11	2032.8	2426.15	14099.9	1970.95	1359.54	1332	1606.65	2010.12	2115.67	2312.75	2724.12	1233.16	1659.47	2807.32	2018.64	1104.24	2776.03	1940.27	1184.85	1850.11	807.56	1314.02	2235.31	1018.27	2074.74	1348.53	1809.24	1450.83	2731.75	1230.3	1018.96	2039.11	3524.65	1409.45	1614.75	2051.84	1144.43	4631.72	2518.56	2502.27	1614.18	2928.31	2764.8	2359.89	1333.68	1338.3	2979.33	3626.5
hsa-miR-200a-3p	417.41	144.68	192.82	171.6	422.88	266.78	177.67	461.79	293.48	133.16	250.87	305.3	375.23	2519.36	148.2	122.65	289.1	188.6	393.42	125.64	348.39	205.05	742.58	775.44	397.13	69.14	513.35	348.22	793.64	1285.07	210.73	430.77	683.87	1411.03	484.2	627.5	332.69	262.06	394.28	33.46	945.91	25.25	449.8	1725.57	650.42	270.53	234.05	325.1	359.59
hsa-miR-200a-5p	11.06	5.16	5.48	2.6	16.78	7.52	5.05	19.83	7.6	3.92	11.72	10.1	15.25	97.12	7.74	5.91	10.91	4.74	17.37	3.06	16.44	6.04	27.57	42.75	26.32	3.01	19.86	8.68	33.1	30.36	9.73	20.66	29.13	38.7	11	17.68	16.26	8.76	8.75	0.88	32.88	0.69	10.2	50.43	23.3	7.3	10.75	8.23	11.17
hsa-miR-200b-3p	420.94	138.35	216.62	155.49	545.74	251.75	184.83	446.13	355.11	149.69	423.01	399.93	604.16	2950.39	225.46	142.6	286.59	162.22	579.82	101.02	426.36	210.24	933.8	1205.61	532.76	84.99	564.09	380.81	1304.74	1617.6	210.54	298.01	948.03	1431.57	487.41	646.39	462.19	235.04	471.63	25.22	1339.56	27.7	453.02	1187.9	934.18	270.48	374.32	440.32	511
hsa-miR-200b-5p	13.38	3.22	5.07	6.25	12.13	4.72	2.89	7.64	4.01	3.22	8.24	13.39	9.58	57.42	4.56	8.68	10.17	4.47	5.81	1.55	16.05	5.32	32.59	66.53	29.12	2.97	19.57	10.16	12.23	25.53	4.79	7.65	33.85	30.23	19.14	10.79	13.32	6.29	9.91	0.37	16.17	1.06	13.01	17.13	19.24	3.35	6.46	7.67	14.99
hsa-miR-200c-3p	36.24	35.99	22.2	63.1	127.89	76.06	33.42	261.27	30.64	10.87	36.99	35.07	57.8	5427.96	18.04	24.84	26.53	209.16	242.82	28.04	24.52	29.29	46.4	19.4	183.34	43.43	42.74	11.36	120.63	100.93	16.2	45.6	108.64	80.57	55.64	42.15	25.32	13.29	34.79	121.43	64.81	13.02	23.09	32.03	82.29	545.52	50.88	45.53	129.02
hsa-miR-202-5p	0.05	0.24	4.55	1.32	0.86	0.23	0.48	0.33	0.59	0.69	0.39	0.09	0.45	1.28	0.19	0.42	0.79	1.94	1.06	6.74	0.74	0.27	0.76	0.23	0.37	2.48	0.1	0.19	1.23	1.42	0.24	0.56	0.87	0.66	1.26	0.28	0.32	0.22	0.92	0.51	0.5	0.09	1.99	0.42	2.89	0.98	0.44	1.31	1.08
hsa-miR-203a-3p	83.49	144.07	150.5	270.56	82.35	11.35	62.57	49.66	102.58	4.01	111.8	35.89	82.98	30.39	77.69	38.33	52.23	21.55	140.58	153.59	138.67	21.91	76.26	2.44	45.69	15.67	114.47	2.29	142.35	16.34	53.69	34.28	98.31	87.05	132.6	61.32	86.7	528.75	101.08	75.11	111.35	43.58	84.97	18.29	51.94	835.34	95.26	118.92	66.18
hsa-miR-203b-5p	0.6	0.95	1.09	1.23	0.29	0.05	0.36	0.22	0.65	0.05	0.64	0.05	0.3	0.19	0.47	0.05	0.28	0.23	1.37	1.15	0.61	0.27	0.27	0.001	0.09	0.13	0.63	0.001	0.8	0.05	0.38	0.19	0.79	0.33	0.63	0.47	0.5	2.77	0.63	0.32	0.73	0.28	0.41	0.05	0.14	8.32	0.79	0.89	0.64
hsa-miR-204-3p	3.3	1.04	3.16	0.91	1.87	0.51	1.08	0.33	1	1.2	2.94	16	1.59	0.47	2.23	3.37	2.89	0.81	3.59	5.5	2.57	0.85	0.71	0.52	2.12	0.4	4.39	10.93	5.52	0.43	1.1	0.14	4.07	1.18	3.04	1.16	5.3	0.92	0.98	1.25	1.69	4.06	4.39	0.32	5.1	2.18	3.4	1.17	5.63
hsa-miR-204-5p	80.52	131.87	359.62	85.78	155.26	126.48	121.77	42.25	199.68	218.69	235.52	5311.73	153.3	77.08	159.17	414	203.91	218.33	290.95	876.16	360.05	158.01	80.63	41.49	180.76	122.4	275.78	5156.46	517.2	9.24	128.52	46.26	339.2	203.05	203.19	77.93	191.69	154.18	223.69	96.4	81.98	1418.29	255.55	100.43	702.04	323.33	253.57	147.1	314.33
hsa-miR-20a-3p	4.09	4.97	2.9	12.18	2.83	2.24	0.84	0.71	1.18	2.35	3.09	1.44	1.09	1.32	2.47	2.08	2.42	7.63	2.93	2.48	2.35	1.3	1.04	2.3	0.83	0.93	2.68	2.05	2.69	2.75	0.19	0.75	2.62	3.22	4.3	1.12	1.36	1.06	6.34	8.42	1.55	1.06	7.79	3.39	1.76	1.81	1.73	3.79	3.87
hsa-miR-20a-5p	514.65	729.9	246.99	2351.94	328.88	279.81	153.15	162.45	331.25	380.59	530.25	890.92	256.44	342.51	371.95	502.48	378.17	1313.89	319.67	230.92	472.45	200.8	220.54	282.64	156.19	594.1	328.62	406.24	235.32	216.92	225.21	157.13	342.26	508	377.04	220.52	487.15	377.91	561.18	2498.25	382.37	328.12	826.46	881.69	372.81	358.66	213.49	775.1	714.87
hsa-miR-20b-5p	11.38	8.84	14.49	134.64	13.71	20.73	8.84	5.77	10.78	4.97	8.68	3.97	13.66	20.46	6.74	37.87	9.61	48.11	15.2	30.52	16.44	216.37	20.03	14.66	20.29	230.23	9.56	5.82	17.04	17.33	16.01	13.81	11.15	9.51	12.38	12.1	16.4	21.74	21.71	13.56	17.08	7.53	13.13	5.62	12.87	17.57	14.89	25.43	13.13
hsa-miR-21-3p	86.23	233.13	455.28	513.28	144.62	154.03	166.67	772.62	296.55	250.1	74.66	267.66	90.18	372.38	56.36	193.45	157.42	99.52	181.75	222.58	143.98	149.24	214.92	618.61	192.77	277.77	120.62	276.17	129.56	1169.94	100.43	655.95	193.31	114.96	118.1	550.78	84.16	149.74	278.12	119.26	334.41	113.85	275.41	183.46	249.7	553.84	263.43	338.8	108.65
hsa-miR-21-5p	31282.8	91373.6	65508.9	208866	63920.7	99257.2	41859.2	222153	75414	127746	35888.7	163447	43494.6	194766	22445.8	110891	29274.5	132839	60128.3	126243	51467.3	183552	118137	212905	85557	320974	38569.3	153520	77257.1	272626	36661.3	322054	37135.6	60505	37712.8	144353	42296.4	119600	40819.7	46995.5	73144.4	75028.9	55199.4	127974	62921.9	330931	70370.2	231047	26348.9
hsa-miR-210-3p	25.83	69.01	39.99	399.95	17.93	110.89	28.67	177.39	42.3	40.95	15.75	15.91	10.08	71.46	11.68	12.61	11.7	79.96	15.25	5.24	6.39	208.99	23.04	204.56	10.49	50.2	10.93	161.75	13.65	212.47	7.72	82.65	12.2	4.49	22.23	21.59	18.53	3.57	70.78	74.23	21.33	7.43	23.15	16.44	11.92	160.04	18.64	47.96	11.51
hsa-miR-210-5p	5.67	3.31	4.71	13.46	2.64	5.04	3.61	8.35	1.12	1.98	3.83	2.25	1.64	4.73	2.37	2.82	3.36	5.29	2.75	2.04	2.09	13.55	1.75	6.2	1.61	4.69	4.49	4.87	4.53	12.55	0.67	4.46	2.8	0.43	5.27	1.16	2.54	0.4	1.09	2.73	2.83	1.94	5.16	0.8	1.35	9.71	3.35	1.54	1.91
hsa-miR-211-5p	0.19	1.32	0.88	0.05	0.29	0.28	0.001	0.27	0.35	0.32	1.91	13.52	0.25	1.61	2.09	350.96	0.51	2.35	1.11	3.42	3.13	1.03	0.001	0.001	0.18	20.45	0.49	12.12	1.04	0.05	0.91	0.33	2.45	1.8	0.69	0.56	0.63	5.94	1.44	3.75	0.37	0.97	2.34	10.18	1.31	0.001	0.2	0.51	0.88
hsa-miR-2110	32.01	56.62	31.71	42.8	45.06	43.84	26.03	32.52	19.27	75.35	93.75	92.33	56.51	62.53	27.59	104.27	65	44.09	89.66	82.12	99.71	40.7	39.2	17.52	52.17	123.19	112.56	27.34	96.46	9.47	19.41	84.67	61.53	65.76	102.91	35.08	55.62	56.51	17.34	28.37	32.61	35.6	64.93	52.81	44.53	50.25	47.04	68.9	30.96
hsa-miR-2116-3p	0.19	1.37	0.21	0.14	0.24	0.23	0.18	0.71	0.12	0.18	0.25	0.41	0.35	0.38	0.43	0.97	0.42	0.68	0.49	1.86	0.65	0.49	0.16	0.05	0.001	0.53	0.73	0.001	0.52	0.09	0.001	0.56	0.22	0.19	0.46	0.001	0.23	0.53	0.17	0.19	0.001	0.51	0.76	0.69	0.14	1.3	0.3	0.28	0.001
hsa-miR-2116-5p	0.6	2.7	0.36	1.14	0.24	0.05	0.36	1.76	0.24	0.28	0.54	0.18	0.99	1.94	0.24	0.92	0.65	0.95	0.35	0.67	0.22	0.67	0.001	0.42	0.14	0.97	0.39	0.05	0.38	0.43	0.1	0.61	0.31	0.28	0.4	0.65	0.54	0.79	0.17	0.69	0.78	0.14	0.41	1.22	0.32	2.42	0.39	0.33	0.1
hsa-miR-212-3p	11.24	24.26	13.09	49.14	15.05	30.91	6.13	9.89	19.21	20.08	9.32	12.62	19.76	38.09	5.41	26.51	12.64	86.6	10.33	52.44	17.44	36.45	31.22	10.9	27.1	154.85	14.35	23.48	22.85	15.01	10.21	23.1	20.47	18.45	12.89	22.66	11.01	99.61	15.2	12.68	11.6	11.73	15.24	43.06	19.74	38.49	23.57	39.92	19.15
hsa-miR-212-5p	0.56	0.76	0.26	1.19	0.38	0.51	0.06	0.33	4.48	4.56	0.15	0.32	2.38	6.81	0.09	0.51	0.14	2.67	0.13	0.84	0.04	0.94	1.75	0.75	1.33	3.41	0.001	0.05	0.24	0.52	0.43	1.46	0.09	0.19	0.34	0.47	0.18	2.95	0.12	0.09	0.37	0.65	0.47	0.27	1.49	2.14	0.44	1.08	0.54
hsa-miR-214-3p	1031.35	268.41	423.36	137.47	572.06	205.06	137.76	93.23	283.41	35.79	444.35	33.05	420.47	234.33	262.5	188.83	215.01	362.84	305.62	280.74	307.3	70.3	429.89	104.49	1005.94	40.95	263.33	7.54	787.03	108.7	133.02	421.24	633.01	346.35	366.62	674.25	304.34	10.12	210.39	33.27	377.02	18.88	315.61	167.19	525.28	106.91	482.49	308.88	1014.06
hsa-miR-214-5p	4.14	1.61	2.69	0.87	2.49	1.26	0.96	1.15	2.3	0.23	0.98	0.18	1.49	1.89	1.19	1.52	1.49	2.44	1.82	1.42	1.7	0.81	1.97	0.38	2.35	0.04	1.71	0.05	4.67	0.57	2.11	2.21	4.68	1.85	2.58	7.68	2.85	0.18	1.15	0.14	2.69	0.14	1.99	0.69	3.25	1.21	2.42	2.85	4.6
hsa-miR-215-5p	0.33	0.57	0.72	1.51	0.24	0.42	0.3	0.77	0.35	8.29	0.44	1.26	0.15	1.28	0.24	1.34	0.14	0.59	0.35	0.71	0.26	2.19	0.05	122.29	0.32	2.88	0.49	1.24	0.19	1.09	0.24	0.47	0.35	0.57	0.23	0.14	0.18	0.97	0.35	1.71	0.41	1.8	0.53	34.73	0.14	4.46	0.1	1.08	0.39
hsa-miR-216a-5p	9.9	37.79	4.55	2.97	1.1	1.77	0.78	2.2	3.42	12.85	1.37	29.3	11.12	42.72	4.32	628.32	1.63	8.49	4.65	6.08	3.09	16.01	14.96	249.43	33.03	781.88	2.1	8.45	14.68	1.52	0.96	23.01	2.45	3.31	12.95	4.28	4.26	9.95	3.69	0.51	2.06	0.42	1.64	0.74	0.63	2.7	0.94	19.07	4.7
hsa-miR-216b-5p	2.04	20.91	1.29	0.82	0.53	0.61	0.66	0.33	1.24	2.12	1.57	22.05	3.08	10.78	1.57	447.85	0.84	0.45	2.44	2.57	2.48	13.95	2.13	31.24	4.88	161.31	1.02	3.24	7.27	0.99	0.58	18.27	1.62	1.7	5.96	1.3	2.72	8.8	1.44	0.05	1.14	0.18	0.7	0.27	0.45	1.86	0.74	9.4	0.69
hsa-miR-217	2.28	9.65	0.78	0.68	0.19	0.47	0.06	0.11	0.41	0.64	0.29	3.92	1.59	3.36	0.76	101.69	0.19	1.72	0.71	0.93	0.57	3.4	1.53	16.58	2.02	50.73	0.2	3.05	1.94	0.33	0.14	3.29	0.48	0.24	2.29	1.02	0.45	1.01	1.61	0.09	0.18	0.001	0.35	0.05	0.001	0.7	0.35	2.76	0.69
hsa-miR-218-5p	151.05	152.96	136.95	207.73	165.76	228.4	97.43	130.03	238.16	104	99.44	37.78	156.08	644.09	59.93	246.41	126.51	766.24	71.26	266.28	145.24	334.08	303.19	989.49	347.58	599.95	110.32	21.66	215.68	233.12	146.93	1157.68	193.7	263.98	115.52	976.65	130.45	312.24	113.17	24.9	208.26	24.88	98.56	244.44	172.83	194.48	183.71	379.23	266.13
hsa-miR-219a-1-3p	1.07	1.66	1.19	1.1	0.96	0.79	1.74	0.49	1	1.38	1.62	1.13	0.55	0.95	0.66	1.8	0.93	1.04	0.8	0.98	0.52	0.58	0.71	0.61	0.6	1.86	1.56	1	0.57	0.66	0.38	0.61	0.96	0.85	1.43	0.56	1.09	2.11	1.21	1.11	0.55	2.86	1.35	0.8	0.9	0.23	0.64	0.37	1.03
hsa-miR-219a-5p	5.34	5.44	8.54	19.48	3.21	4.39	4.09	2.09	5.01	3.68	4.91	10.64	1.34	2.55	4.08	4.29	2.14	19.42	3.41	4.92	1.7	3.76	2.78	2.54	0.92	6.42	1.9	12.21	3.21	9	1.87	2.35	2.23	4.83	3.78	3.35	4.71	26.98	11.86	3.61	4.06	19.11	5.1	2.97	2.17	1.58	1.92	0.93	5.88
hsa-miR-219b-5p	0.7	2.08	0.67	7.07	1.25	3.97	0.54	1.21	1.06	4.56	1.57	1.89	0.99	3.54	0.76	1.39	0.51	14.18	0.75	2.93	1.13	3	1.26	1.46	0.87	4.43	0.54	2.19	1.18	0.19	0.53	1.13	1.01	1.28	0.86	1.16	0.82	20.6	0.86	7.68	0.73	2.68	0.94	4.08	0.95	2.09	0.74	1.68	0.78
hsa-miR-22-3p	14265.3	4172.59	20601	6165.12	11463.5	3487.78	12240.8	7846.48	13804.8	23987.4	16361.9	8801.39	10214.8	6149.75	13940.8	12636.3	7863.19	6431.51	16306	16360.6	14733.7	7989.84	10104.4	6064.3	11151.1	6191.86	14144.9	3504.49	11803.9	7997.79	7150.64	10679.9	14219.7	6634.46	15498.8	11723.9	14824	5958.1	9258.83	2100.91	16250.7	9424.57	19128.8	9720.96	9518.52	10984.1	11900.3	6399.96	10290.2
hsa-miR-22-5p	51.85	20.91	51.12	20.12	33.6	22.69	51.33	34.33	35	63.65	32.28	16.91	30.89	56.34	21.42	62.2	31.89	35.24	50.17	39.09	20.39	28.53	37.88	27.86	47.07	32.89	50.89	13.69	26.87	35.76	14.09	64.24	51.39	32.41	55.07	60.9	32.66	15.98	40.49	13.61	40.24	23.31	63.81	34.62	24.07	72.47	43.24	29.07	16.61
hsa-miR-221-3p	136.87	494.78	91.11	309.52	136.47	684.18	57.04	317.42	53.32	181.06	44.74	320.67	23.44	310.51	46.06	57.26	41.08	173.06	48.13	84.38	52.4	496.24	63.65	252.76	53.23	60.87	47.33	677.07	58.07	1241.17	49.9	480.74	65.21	512.17	50.48	396.37	61.74	356.08	73.6	264.38	112.54	187.54	82.27	157.32	72.48	91.11	52.61	238.11	65.3
hsa-miR-221-5p	2.83	6.86	3.47	5.2	4.17	6.68	1.8	4.78	4.48	7.23	2.8	13.93	2.28	12.62	1.52	2.96	1.21	8.76	2.93	6.65	3.91	8.01	3.28	6.62	4.32	9.03	2.63	11.59	3.12	17.29	1.77	7.47	3.06	9.56	2.92	5.58	2.76	13.82	3.28	3.75	5.48	25.07	4.34	3.71	4.11	5.35	2.51	6.26	3.62
hsa-miR-222-3p	340.98	1730.05	175.39	558.45	356.64	1424.91	100.08	230.9	229.67	355.67	234.93	1319.3	124.45	1165.15	63.54	541.87	282.06	1074.15	265.11	760.68	413.66	1851.25	467.83	618.1	253.87	614.42	154.04	454.58	401.28	1820.5	158.58	1753.75	468.04	1677.62	168.12	347.29	229.38	973.83	84.32	549.96	319.34	1105.59	460.87	428.07	294.91	806.61	176.8	761.17	226.3
hsa-miR-223-3p	507.12	337.7	919.26	444.85	522.49	571.71	330.04	774.59	934.24	332.13	160.95	26.73	477.68	4701.35	219.62	149.9	439.91	512.18	523.09	492.85	288.04	227.37	2215.34	1005.6	725.95	346.83	159.36	193.72	739.53	3005.64	577.21	1668.66	601.04	304.67	419.33	2713.34	370.2	139.09	920.33	175.35	968.29	44.51	518.3	255.74	533.81	3899.11	646.87	544.51	569.83
hsa-miR-223-5p	3.62	4.11	6.98	2.33	4.51	4.34	3.01	6.54	13.79	4.24	2.6	0.86	7.55	38.85	3.66	3.32	7.23	3.48	4.92	13.4	5.96	1.92	22.33	5.17	7.36	16.02	2.78	1.57	7.88	13.64	3.02	13.38	8	3.64	5.67	19.31	4.48	1.45	5.3	2.18	6.76	0.83	8.67	3.39	5.51	22.03	7.69	5.94	6.17
hsa-miR-224-3p	0.42	0.95	0.52	0.14	0.81	0.37	0.78	0.27	0.18	2.07	0.05	4.55	0.45	0.76	0.19	1.99	0.65	3.43	0.98	3.68	0.87	7.29	0.16	1.17	0.41	0.35	1.07	0.33	0.85	3.46	0.001	0.52	0.17	1.23	1.32	0.65	1.36	0.35	0.86	0.51	1.42	2.77	0.64	1.75	0.63	0.74	0.25	1.73	0.44
hsa-miR-224-5p	54.08	316.85	69.48	17.79	97.84	228.31	144.13	190.08	31.35	702.26	23.11	3496.29	106.72	158	13.39	915.04	101.23	445.78	160.92	264.28	151.19	3943.24	81.77	939.97	115.25	408.1	147.3	15.13	91.6	482.67	11.94	133.74	34.94	289.91	245.54	37.5	113.78	53.21	141.68	191.68	138.75	439.01	143.27	626.32	64.27	680.04	28.65	601.26	16.9
hsa-miR-2276-3p	0.6	1.84	0.72	0.73	0.34	1.45	0.66	0.88	0.41	1.84	0.34	0.32	0.45	0.99	0.05	0.23	0.23	0.5	0.53	0.98	0.22	2.82	0.33	0.52	0.46	1.28	0.49	0.76	0.05	0.52	0.05	1.88	0.31	2.41	0.46	0.51	0.27	1.36	0.12	1.2	0.09	0.32	0.29	1.7	0.09	0.28	0.59	1.12	0.24
hsa-miR-2277-3p	2.42	6.01	4.29	4.29	2.35	3.92	2.1	3.19	0.71	2.16	3.73	3.83	0.79	3.21	1.42	2.31	1.17	3.03	1.99	4.66	1.65	5.05	1.69	3.34	1.61	4.56	1.32	2.72	1.98	2.56	0.38	4.7	1.22	2.51	2.29	1.49	1.72	7.7	0.46	3.56	1.14	2.95	2.17	3.55	2.12	2.37	1.08	1.22	3.13
hsa-miR-2277-5p	0.33	0.71	0.52	0.5	0.29	0.61	0.24	0.22	0.001	0.41	0.1	0.23	0.15	0.28	0.001	0.05	0.001	0.41	0.04	0.62	0.001	0.4	0.11	0.23	0.001	0.4	0.15	0.19	0.14	0.47	0.19	0.61	0.13	0.14	0.06	0.28	0.27	0.4	0.12	0.28	0.14	0.09	0.12	0.11	0.05	0.23	0.15	0.23	0.1
hsa-miR-2278	0.79	2.32	1.03	0.87	1.2	2.15	0.66	1.32	0.88	1.98	0.74	0.9	0.79	2.03	0.24	1.34	0.65	0.72	0.75	1.06	0.52	1.65	1.09	2.11	0.69	1.28	1.07	1.57	0.94	1.61	0.48	1.74	1.66	1.14	1.09	1.49	1	0.88	0.81	0.83	0.37	1.06	1.29	1.33	0.59	2.74	1.33	1.03	0.98
hsa-miR-2355-3p	0.14	0.8	0.31	0.32	0.58	0.98	0.12	0.38	0.24	0.18	0.44	0.001	0.05	1.04	0.05	0.46	0.05	0.32	0.18	0.62	0.26	0.36	0.49	0.23	0.05	0.75	0.39	0.05	0.14	0.71	0.05	0.61	0.26	0.28	0.34	0.33	0.32	0.13	0.17	0.23	0.37	0.18	0.23	0.32	0.14	0.19	0.1	0.65	0.24
hsa-miR-23a-3p	4529.18	4367.97	5107.36	5506.47	5792.09	4893.45	3859.09	21734.6	6374.69	2771.55	4680.89	1121.16	5178.95	20823.5	3632.66	5127.29	2880.93	6244.58	6964.32	8919.72	5475.45	8556.88	9031.99	16946.2	12793.7	5894.21	5236.48	3917.89	12976.1	21060.3	4844.35	12965.9	9143.5	7399.44	5001.4	8599.61	5459.32	2448.32	4330.97	1547.94	8649.9	2460.63	3977.74	7720.56	11906.7	13439.3	5208.41	9100.28	7315.36
hsa-miR-23b-3p	4743.56	3262.01	6239.05	1920.87	4676.35	7976.06	4460.26	3389.76	3524.96	4085.84	6585.4	7742.81	3450.43	4500.96	5414.78	4097.31	3167.61	5309.8	8832.97	4661.52	6453.7	7187.29	3264.1	2705.32	4150.67	1590.77	5753.97	7811.59	7833.62	2562.43	3212.68	1710.6	6851.26	5687.52	6993.03	2131.99	6910.18	6629.94	4647.61	4418.44	6542.55	10510.2	7377.35	4573.72	6043.67	2643.06	3144.31	3689.88	4370.81
hsa-miR-23b-5p	7.81	3.26	9.47	2.51	7.09	6.82	3.97	0.88	3.3	3.41	20.46	22.54	5.41	5.48	6.84	16.9	10.68	6.23	8.91	10.43	26.96	5.72	3.44	1.46	3.36	2.7	18.39	8.4	11.76	1.85	3.6	1.22	10.58	6.91	19.25	2.51	9.15	8.19	7.08	3.01	4.29	18.1	23.32	5.04	6.19	2.46	3.45	2.62	5.49
hsa-miR-23c	1.21	0.33	0.52	0.32	0.77	1.03	0.42	0.05	0.41	0.09	0.25	0.41	0.25	0.05	0.47	0.28	0.37	0.54	0.27	0.13	0.78	0.85	0.22	0.05	0.64	0.001	0.44	0.33	0.33	0.52	0.72	0.001	0.92	0.09	0.23	0.6	0.18	0.62	0.35	0.74	0.23	0.42	0.35	0.42	1.45	0.19	0.54	0.14	0.69
hsa-miR-24-1-5p	3.76	1.09	1.76	0.87	1.82	1.31	1.2	0.27	1.89	1.01	2.75	1.58	1.64	0.8	1.71	1.15	1.77	2.35	1.68	1.02	1.13	1.61	2.29	0.7	2.16	0.35	1.37	1.38	1.18	0.9	0.77	0.28	1.53	0.85	3.04	1.12	1.9	0.57	2.19	0.83	1.74	2.49	2.05	0.58	0.99	0.74	1.08	0.93	1.52
hsa-miR-24-2-5p	8.78	6.91	5.07	7.85	6.52	5.14	2.52	12.69	5.24	3.18	3.58	2.21	4.12	12.71	3.04	7.16	3.92	17.98	5.1	9.67	5.17	10.6	7.31	12.36	6.67	8.06	3.46	4.68	6.33	44.43	1.34	10.71	6.43	6.15	6.02	11.86	3.26	1.54	3.8	3.05	2.47	2.31	7.03	9.17	4.47	13.2	4.59	13.79	7
hsa-miR-24-3p	7436.68	3254.07	3715.74	3268.87	4017.25	3910.55	2197.7	5764.03	9099.04	7896.3	4287.02	3799.88	11454.8	15543.5	2759.55	3701.27	2821.57	6687.87	3348.19	2498.44	4164.23	4597.85	14116.9	22258.2	17915.2	9955.96	2921.56	3611.56	3968.39	12504.4	1650.85	2825.68	7258.91	6349.75	4053.17	6434.96	2724.56	1974.41	3358.4	4083.71	3512.99	2172.73	4801.68	3196.52	3092.92	2887	3214.76	4129.36	10242.5
hsa-miR-25-3p	498.48	1271.03	672.27	628.94	612.04	1095.47	363.82	427.78	713.11	1482.73	515.09	1175.76	504.25	1507.76	467.21	1163.07	430.35	1745.66	545.08	882.99	646.34	2002.23	815.83	6578.04	782.53	2299.13	561.94	1303.42	582.49	512.65	528.07	1024.97	626.8	1067.34	456.18	548.69	560.35	1088.18	1133.6	1113.21	693.71	976	620.32	1486.27	641.21	740.52	571.97	869.38	601.08
hsa-miR-25-5p	4.37	10.97	5.02	2.14	1.87	2.24	1.8	1.65	0.82	6.08	1.77	1.44	1.44	4.21	1.85	6.51	3.12	2.67	4.17	8.87	3.44	4.87	2.67	50.98	3.96	11.42	4.44	3.34	3.4	6.54	1.68	2.35	2.58	2.13	4.13	5.07	2.72	6.51	1.56	17.49	2.37	1.75	12.07	2.81	2.12	2.84	2.37	3.46	3.23
hsa-miR-26a-1-3p	1.67	3.17	2.28	1.37	1.73	1.63	1.2	0.38	1	2.3	3.53	2.52	1.29	1.8	1.66	3.46	2.19	1.94	1.86	2.26	4.39	2.33	1.31	2.63	1.93	0.97	1.76	4.2	1.04	0.57	0.62	0.38	2.97	1.56	2.46	1.02	1.99	2.16	3.23	2.59	1.51	3.37	2.64	0.42	3.16	1.53	0.99	1.03	2.16
hsa-miR-26a-2-3p	1.63	2.93	3.31	1.64	1.39	1.21	1.2	1.1	1.12	1.52	3.88	1.35	0.35	1.51	1.9	4.06	1.59	2.26	5.58	8.87	3.26	1.57	1.86	1.74	1.93	1.42	1.56	6.68	3.02	2.94	0.72	1.22	1.88	1.75	2.64	1.77	1.72	13.2	4.32	2.22	3.2	4.11	3.28	0.21	3.16	0.88	1.43	1.64	3.82
hsa-miR-26a-5p	28836.8	32158.1	36647.5	25944.7	45369.9	20494.8	21496	18949.1	28251.8	39593.1	65095.8	42507.2	44994.2	39709.1	29661	52585.1	28393.6	37938.5	55781.2	45891.8	65090.4	30795.1	25578	29452.6	49477	32316.7	40424	44007.4	63768.2	17932	32005.1	25525.1	53027.5	39232	30490.7	16269.9	50891.2	121522	32912.2	24201.2	54791	44243.7	37372.7	18393.2	100944	27541.8	29731.4	26583.3	58650
hsa-miR-26b-3p	8.92	8.8	17.28	7.48	6.76	4.06	5.47	4.56	12.2	9.81	16.58	6.81	7.3	12.57	16.76	10.67	6.62	8.36	5.05	5.72	14.57	19.23	10.04	12.03	11.04	6.95	15.86	27.29	3.64	5.87	0.67	0.99	14.13	9.84	22.4	8.56	2.22	2.46	13.53	7.17	4.75	3.92	20.16	6.68	3.79	2.09	8.33	6.22	11.61
hsa-miR-26b-5p	11573.2	10790.5	11222.1	13613.4	10179.3	5252.07	4998.81	3036.41	7340.04	9150.21	13489.8	3627.62	8529.16	7853.55	9706.01	7144.77	10536.7	7506.07	11321	6905.31	11144.6	12737.7	5687.32	9215.38	6849.12	4264.13	13529.1	22888.1	8645.48	6855.66	6165.06	4019.38	11818.2	8397.14	9939.25	7630.31	10549.1	8125.03	11898	4208.39	10520.9	5850.4	9289.57	6757.48	10661.9	7771.17	8884.96	5845.73	13944.7
hsa-miR-27a-3p	7159.17	9081.26	8531.25	14180.1	11404.3	8105.81	6411.9	42586.3	14916.7	7013.3	8689.71	3217.91	11115.7	23714.3	5421.47	10781	5390.64	6136.71	7969.38	18586.2	9112.78	8537.38	14712.1	23893.5	10262.6	8009.33	7140.66	2918.89	18319.2	105664	4514.26	23293.7	11807.8	10322.5	6455.14	27166.1	8515.45	1487.48	10583.8	3182.97	15782.5	4286.36	7876.19	12380.4	14038.1	23449.6	9929.26	18490	14983.2
hsa-miR-27a-5p	10.04	7.43	10.97	2.69	5.99	2.01	4.69	9.06	7.95	1.52	6.28	3.07	4.67	9.5	10.21	23.97	69.29	6.14	34.57	68.77	63.53	4.83	5.51	8.97	21.76	11.51	12.98	2.82	24.46	33.15	10.55	3.29	32.41	6.95	9.86	4.56	9.42	9.64	7.6	2.55	20.23	16.3	35.63	2.07	30.08	8.18	36.63	7.81	35.71
hsa-miR-27b-3p	11700.1	9722.29	19230.5	10900.9	12619.8	14167.7	12162.5	11910.5	15361.3	12906.3	15245.6	21027.5	16120.2	14666.1	12296.7	18328	9216.57	11793.2	17897.1	11706.3	15700.7	17090.9	11625.9	7613.67	11131.3	7426.91	12666.1	19316.7	15884.7	16888.7	8628.87	6649.38	12588.7	13060	13619.6	10476.9	17776.6	16969.1	15991.8	9603.79	21026.8	23386.4	14569.7	11527.7	12452.8	7140.49	8751.24	7618.52	12439.7
hsa-miR-27b-5p	33.17	41.76	35.59	9.54	22.72	24.93	19.59	14.78	26.63	20.04	33.75	32.05	18.72	25.76	26.26	74.53	27.19	34.78	59.34	63.22	57.22	43.74	4.04	2.63	3.77	2.39	39.38	30.87	33.99	29.13	15.05	11.13	35.73	30.51	47.16	29.4	36.78	63.95	26.95	67.89	46.68	64.77	62.99	13.26	34.19	24.45	22.53	18	15.92
hsa-miR-28-3p	242.11	278.44	280.15	368.97	186.56	152.16	138.72	212.49	179.06	272.12	171.5	118.12	259.18	355.93	193.6	179.87	132.76	134.17	228.2	146.94	166.76	266.1	194.17	354.67	186.74	121.6	202.39	152.64	157.75	217.58	156.32	256.36	217.84	140.6	158.27	234.94	228.2	109.9	338.01	248.93	275.49	150.05	162.73	238.08	213.62	240.22	183.61	136.35	169.09
hsa-miR-28-5p	812.47	1345.05	1167.65	837.32	850.8	491.26	652.69	564.41	1044.3	1149.54	1233.66	996.24	984.46	1240.25	751.78	1222.04	587.3	653.49	948.24	1271.31	1102.4	1145.75	921.57	862.73	1023.38	1047.13	810.59	701.31	796.9	275.93	390.97	555.5	942.21	806.85	1028.62	459.78	849.2	677.91	763.05	413.67	711.02	1424.34	1432.13	832.64	955.81	841.01	739.51	688.44	1119.86
hsa-miR-296-3p	0.37	1.61	0.67	0.14	0.05	0.05	0.18	0.05	0.12	0.51	0.15	0.001	0.05	0.47	0.09	0.001	0.05	0.27	0.27	0.18	0.17	0.13	0.22	0.19	0.28	0.09	0.24	0.14	0.28	1.47	0.05	0.001	0.31	0.19	0.4	0.79	0.23	0.48	0.29	1.8	0.41	0.05	0.35	1.01	0.18	0.05	0.25	0.7	0.29
hsa-miR-296-5p	37.45	94.07	38.85	19.39	33.08	5.04	37.99	11.04	14.61	61.53	19.57	1.62	26.22	45.61	15.43	5.86	31.8	12.47	26.77	11.8	33.57	7.25	47.17	41.81	49.14	23.68	34.94	2.15	71.67	69.05	12.56	2.77	54.01	51.9	47.96	40.2	35.24	23.11	30.12	204.08	31.24	2.08	31.7	145.39	40.6	8.13	47.87	91.38	49.67
hsa-miR-299-3p	4.32	3.69	7.76	0.87	6.76	53.74	1.44	0.27	2.42	0.18	1.47	0.18	0.7	1.04	1.76	2.22	1.54	2.03	1.29	3.64	3.57	0.36	2.57	1.03	1.29	0.4	2.15	1.29	3.26	0.99	0.91	0.38	2.41	18.64	4.07	12	1.13	0.04	4.38	9.63	2.79	0.32	2.75	1.86	1.31	1.16	4.93	2.9	4.21
hsa-miR-299-5p	1.86	0.66	1.71	0.32	3.36	24.93	0.66	0.55	1	0.23	0.29	0.001	0.35	0.99	0.43	0.32	0.23	0.45	0.58	0.44	1.22	0.22	1.04	0.61	1.06	0.35	0.15	0.43	0.57	0.99	0.81	0.28	0.35	5.49	0.17	3.21	0.72	0.18	2.13	2.22	1.32	0.05	0.53	0.37	0.5	0.6	1.04	0.84	1.03
hsa-miR-29a-3p	1923.5	1699.97	2195.81	1334.13	971.4	368.24	810.1	985.44	790.18	991.6	995.69	2870.32	540.15	613.46	1263.58	1197.06	990.23	1286.87	1401.36	2579.49	1586.34	1172.41	1055.75	1206.78	975.81	1541.55	1369.61	7427.06	1907.68	1804.92	495.48	621.53	2070.68	1415.81	2231.21	1452.81	736.32	1081.13	4389.31	616.88	910.88	1509.2	2100.56	1560.72	1058.64	588.33	881.21	1415.25	3010.14
hsa-miR-29a-5p	2.88	4.97	4.86	5.61	3.16	1.68	3.85	5.27	1.65	5.2	3.24	6.13	1.64	3.02	2.09	2.45	2.8	8.36	3.06	3.82	2.78	4.87	3.11	3.38	1.7	2.66	2.88	12.31	2.88	5.64	1.15	5.21	3.76	2.18	4.7	3.3	2.81	2.82	11.23	1.39	2.69	3.09	4.81	4.08	2.03	3.63	2.51	5.33	2.45
hsa-miR-29b-1-5p	0.98	3.41	5.17	0.78	5.56	0.93	1.08	1.43	1.71	3.68	6.08	9.51	1.59	1.65	1.09	5.86	4.15	1.81	8.95	10.29	10.44	2.68	1.31	1.97	2.85	4.69	4.2	2.48	5.29	1.23	1.68	1.22	8.83	3.55	9.91	1.3	3.8	14.13	3.34	1.43	2.51	8.13	14.83	1.27	4.56	2.23	3.25	3.04	1.76
hsa-miR-29b-2-5p	14.08	10.41	19.92	8.35	12.61	7.8	15.27	16.98	14.2	27.41	15.65	20.02	14.8	13.61	11.16	13.16	9.79	15.31	21.27	20.59	21.79	15.97	19.71	15.83	24.06	19.12	16.54	17.65	20.73	6.01	11.98	19.68	21.56	19.82	26.13	12.79	26.45	30.77	20.62	5.51	16.72	28.95	23.2	6.04	22.76	37.79	13.41	12.85	20.92
hsa-miR-29b-3p	97.99	98.33	117.86	58.81	90.98	33.76	78.68	136.08	160.68	123.16	73	149.9	71.36	60.78	54.13	43.5	42.11	106.48	97.01	157.01	73.49	60.78	209.9	168.81	183.11	216.82	54.94	440.64	208.74	180.07	55.61	68.42	81.78	58.71	94.43	160.18	59.97	54.97	200.36	40.4	153.32	241.74	94.75	146.51	132.01	138.38	73.66	127.33	201.62
hsa-miR-29c-3p	1069.26	444.79	1197.5	420.3	471.15	127.41	508.25	344.39	512.66	390.53	724.27	781.1	317.58	217.22	718.69	321.36	439.95	481.96	882.65	824.07	663.82	261.76	616.91	391.17	495.31	292.82	643.18	1664.71	1107.72	229.37	327.55	132.48	999.28	675.43	1187.12	549.62	434.02	447.15	2409.16	166.65	608.85	761.87	1340.19	212.63	725.17	370.56	431.01	290.04	2055.21
hsa-miR-29c-5p	47.81	28.38	172.28	65.56	113.03	56.91	105.61	137.83	89.68	203.26	217.76	256.25	138.65	112.25	138.47	108.75	24.39	38.44	181.53	249.42	201.42	107.87	91.71	81.65	128.36	90.88	158.23	195.25	176.35	36.42	143.71	112.71	197.9	173.48	192.3	125.19	213.84	209.91	132.69	31.79	123.36	207.57	173.86	68.14	179.2	188.35	92.25	93.67	130.05
hsa-miR-301a-3p	13.2	52.97	18.63	35.41	33.31	199.08	13.94	33.51	26.57	104.88	11.09	46.21	9.98	35.87	5.75	18.98	7.69	79.55	15.82	54.44	14.22	193.34	26.97	20.72	18.82	33.29	7.95	70.19	22.99	49.82	14.14	52.6	13.3	35.86	13.81	26.33	20.2	53.17	37.95	102.04	21.33	20.04	18.99	38.71	17.07	59.08	17.7	50.11	15.38
hsa-miR-301b-3p	2.09	11.07	3.62	4.84	2.83	17.65	0.54	1.32	0.77	13.5	1.03	2.48	0.3	2.36	0.52	2.82	1.12	7.23	2.04	13.53	1.91	17.26	2.57	3.71	1.15	9.25	0.93	16.7	2.31	6.39	0.34	3.57	1.53	4.87	4.93	3.44	0.91	4.01	2.25	31.38	0.91	0.97	4.81	60.93	0.36	2.84	1.04	5.94	0.98
hsa-miR-3064-5p	0.46	0.52	0.88	0.68	0.72	2.8	0.24	0.66	0.29	1.66	0.74	2.52	0.65	1.32	0.24	0.92	0.61	0.9	0.8	1.82	1.13	2.64	0.82	0.8	0.69	1.99	0.98	1.34	1.09	0.28	0.34	1.41	1.05	1.99	1.03	0.88	1.31	3.43	0.23	0.79	1	0.97	0.64	1.8	0.54	1.21	0.35	1.78	0.34
hsa-miR-3065-3p	0.98	0.66	2.22	7.94	6.14	3.55	5.29	3.3	2.71	0.46	8.19	2.75	5.36	7.75	2.18	0.23	2.7	4.7	5.85	3.46	2.17	8.36	8.3	0.56	2.62	1.2	5.27	5.2	3.64	4.78	0.43	2.16	1.88	4.07	4.99	3.54	2.9	0.48	8.24	4.72	8.27	3.46	11.07	0.42	1.63	2.23	3.85	0.33	7.89
hsa-miR-3065-5p	1.12	0.38	1.86	1.55	1.73	0.61	2.1	0.66	1.77	0.55	1.03	0.59	1.24	0.28	0.85	0.28	1.59	0.54	4.3	3.15	0.74	1.16	2.67	0.94	3.27	1.64	2.83	4.53	1.75	0.71	0.14	0.42	1.92	0.71	2.98	1.81	2.72	0.26	3.17	13.24	1.42	0.88	3.52	0.42	0.95	1.12	1.63	0.33	1.13
hsa-miR-3074-3p	11.66	4.82	6.57	3.01	4.31	6.07	3.73	1.7	4.83	2.44	8.73	11.54	5.16	3.59	4.7	6.37	6.11	7.59	6.78	5.01	5.65	5.81	4.75	3.05	5.2	2.52	8	6.39	6.14	4.4	3.02	1.13	7.78	5.44	12.21	2.93	6.43	3.74	6.05	4.77	2.79	7.02	11.07	3.82	4.15	2.37	4.49	3.74	6.81
hsa-miR-3074-5p	2396.89	1457.24	1361.66	1379.48	1606.02	1613.95	741.88	2208.09	4253.09	4604.74	1741	1694.84	5819.26	3923.7	755.01	1213.68	1204.26	1292.88	1018.89	1214.53	1084.88	468.02	6038.98	8942.55	7959.91	2339.37	1292.47	307.23	1573.4	2357.26	445.72	1135.23	2837.34	2372.26	2011.29	1674.02	1119.84	342.79	1320.89	1746.24	1013.69	567.22	1561.22	1652.08	792.01	1042.84	1325.04	2027.73	5309.29
hsa-miR-30a-3p	377.22	116.02	252.42	142.12	172.81	56.54	162.89	454.37	243.46	194.97	246.95	131.82	222.13	226.57	215.35	143.66	263.41	213.94	166.59	217.16	267.43	128.98	160.87	93.45	169.03	60.34	358.63	161.51	170.64	136.64	123.05	301.16	305.66	119.41	247.2	332.82	203.97	109.42	339.8	66.08	209.95	20.18	231.46	73.76	179.43	73.16	179.02	80.54	256.58
hsa-miR-30a-5p	1528.11	381.12	996.45	433.62	543.49	148.71	291.09	559.3	709.52	475.97	715.97	604.29	439.29	319.78	528.27	440.78	580.63	1122.8	720.22	838.85	524.2	483	1022.62	546.78	934.91	323.37	769.85	685.99	935.19	482.24	382.54	593.4	771.82	317.63	977.74	1003.31	589.61	318.62	845.86	195.01	632.97	73.45	996.1	145.76	387.99	264.07	464.29	240.68	1111
hsa-miR-30b-3p	8.87	5.72	13.97	3.74	6.71	1.54	2.95	3.57	2.3	4.79	16.78	14.02	2.63	2.93	12.73	4.94	5.74	3.98	19.81	23.03	19.39	4.65	2.51	3.9	4.09	2.04	10.88	15.46	9.4	1.89	2.73	2.63	16.23	9.79	12.89	2.93	8.15	19.89	7.37	3.38	15.21	10.53	18.99	6.58	10.93	4.69	3.94	5.75	10.73
hsa-miR-30b-5p	2596.12	1921.22	1892.43	3137.88	1138.31	641.37	712.37	622.15	977.72	1569.87	1138.59	2852.83	794.76	725.1	966.56	608.37	1058.82	2708.81	1159.33	1394.38	1054.83	1949.77	1047.18	2013.08	1191.9	692.2	1234.11	4110.56	920.89	1034.29	502.38	750.48	1322	1770.06	1565.59	825.26	1007.28	1954.78	1892.96	397.8	1017.75	1206.7	1720.73	1448.89	1130.45	1259.64	855.82	1438.48	2091.5
hsa-miR-30c-1-3p	7.94	4.11	7.71	2.69	4.7	1.49	3.55	1.48	2.06	2.3	22.81	5.09	2.43	1.42	12.68	7.2	5.36	3.52	17.86	13.27	14.39	3.26	1.86	1.74	2.02	1.51	12	7.3	6.89	1.89	1.77	1.5	9.45	3.64	12.43	3.91	10.24	8.49	6.91	8.19	11.6	12.79	13.83	2.17	9.17	2.32	4.34	2.15	7.49
hsa-miR-30c-2-3p	10.55	2.6	8.85	2.69	5.66	1.21	6.01	11.76	3.3	4.42	11.77	5.41	4.82	3.31	8.97	6.74	5.5	7.5	12.94	19.21	15.05	3.98	3	1.6	4.14	2.21	13.52	5.2	10.15	2.75	2.35	5.31	9.97	4.35	15.59	6.51	9.56	8.32	6.05	3.33	12.1	2.4	12.25	1.33	10.7	3.25	5.72	2.29	6.91
hsa-miR-30c-5p	1282.38	783.1	729.7	583.23	351.7	217.99	218.48	249.13	396.65	305.83	391.96	391.09	255.7	224.02	336.19	318.22	507.38	1106.13	532.62	290.5	316.43	588.15	447.41	411.14	400.77	210.18	467.34	812.53	376.31	459.84	213.27	336.99	544.36	424.41	776.78	547.06	475.42	454.36	1059.88	264.89	323.4	175.35	746.42	147.51	249.34	277.78	288.03	270.97	592.75
hsa-miR-30d-3p	42.23	63.43	59.24	41.61	33.55	19.14	22.06	19.5	34.47	54.12	57.59	167.84	26.77	29.02	44.02	32.65	49.47	40.79	39.98	55.63	76.1	53.76	24.84	41.53	24.75	28.82	57.72	106.26	32.01	15.77	20.37	23.2	53.97	39.6	42.23	29.03	33.38	80.77	48.49	13.7	35.35	67.5	60.53	81.02	45.03	49.6	25.54	40.43	57.41
hsa-miR-30d-5p	4555.02	4742.9	2932.13	4281.11	2032.54	1560.63	919.68	886.83	1326.82	3984.7	2300.93	7780.72	1577	1574.21	2433.38	2008.57	2050.13	4565.06	2623.44	4609.48	2726.31	5178.22	2326.04	3986.52	2936.95	2883.36	3087.84	6610.37	2377.76	1156.2	1865.61	2028.66	3090.65	4805.49	3010.91	2191.77	2370.31	5204.26	2328.47	1297.48	1845.56	3015.48	3098.83	6002.36	1869.07	3332.95	1475.22	3220.53	3595.3
hsa-miR-30e-3p	415.6	278.3	316.94	270.69	205.07	106.03	236.7	102.07	263.02	174.15	446.8	178.35	309.93	265.28	353.76	336.42	354.15	259.98	271.27	310.51	408.57	164.89	208.42	116.56	169.26	168.35	432.5	247.45	193.72	173.3	143.47	163.61	346.37	149.64	328.74	258.43	246.14	151.76	563.89	143.41	261.97	298.02	400.52	125.88	244.15	144.1	203.13	79.28	337.06
hsa-miR-30e-5p	1054.35	670.16	493.57	401.87	228.84	106.17	144.67	46.86	402.07	213.85	313.17	249.08	253.22	166.22	306.52	350.59	346.79	842.09	375.6	354.43	200.37	236.85	493.16	350.81	331.25	336.29	452.65	731.61	350.38	265.51	172.76	107.59	339.9	205.37	634.5	353.2	242.29	193.44	801.17	190.57	240.28	251.11	647.21	94.6	147.72	168.69	204.22	109.05	636.2
hsa-miR-31-3p	1.86	1.47	1.35	4.24	2.59	3.08	2.1	244.02	2	5.85	2.01	0.45	1.94	4.11	1	0.92	0.47	7.05	3.59	2.66	1.26	38.64	3.38	116.09	8.42	38.16	1.41	0.52	23.28	1364.03	1.15	2.91	3.89	1.8	1.72	5.21	1.54	2.46	1.67	0.28	6.07	0.28	1	0.37	14.41	132.2	1.87	3.23	6.61
hsa-miR-31-5p	24.16	16.08	10.35	27.06	21.76	30.3	17.97	3672.35	19.09	73.46	11.68	2.98	20.21	39.42	4.75	8.82	6.9	33.56	19.54	22.94	10.22	300.49	52.57	1345.14	91	238.64	15.52	3.91	118.94	10101	7.19	15.97	26.9	16.89	16.33	62.25	11.14	13.64	8.29	3.29	37.68	3.23	5.86	1.54	132.46	658.47	12.52	26.46	83.08
hsa-miR-3115	0.09	0.66	0.21	0.09	0.29	2.19	0.18	0.16	0.001	1.11	0.05	0.27	0.05	0.61	0.09	0.001	0.05	0.18	0.09	0.13	0.04	0.81	0.11	0.14	0.14	0.35	0.1	0.19	0.14	0.05	0.1	0.47	0.04	0.24	0.23	0.23	0.09	0.48	0.06	0.56	0.23	0.05	0.06	1.54	0.001	0.56	0.1	0.65	0.15
hsa-miR-3117-3p	0.93	7.9	0.83	0.73	0.48	1.03	0.48	0.55	0.82	0.46	0.64	1.13	0.89	3.78	0.19	14.22	0.51	4.79	0.62	2.17	1.09	3.22	0.55	3.48	1.7	0.66	0.24	0.43	0.94	1.42	0.86	24.94	0.92	1.85	0.52	4.42	2.99	14.35	0.12	0.69	1	0.32	0.53	1.54	2.08	1.63	0.94	2.2	0.98
hsa-miR-3120-3p	99.38	35.28	79.67	27.83	70.46	40.29	45.98	33.62	62.46	8.8	48.32	5.41	68.18	84.17	37.13	38.28	41.22	66.45	55	68.23	66.1	15.38	81.56	20.81	131.63	16.47	55.48	3.77	120.3	27.66	49.47	170.47	126.92	83.41	81.2	155.25	67.99	4.05	50.34	8.24	70.84	3.69	69.85	42.79	106.72	30.31	93.14	78.44	169.39
hsa-miR-3120-5p	10.59	4.26	6.98	1.6	5.03	1.68	2.1	0.6	3.83	0.6	3.14	0.32	5.46	2.79	1.99	3.09	3.31	4.83	3.94	6.17	4.3	0.58	10.37	1.27	17.44	1.06	3.46	0.05	12.61	1.42	1.97	10.1	7.83	4.31	3.84	6	6.07	0.31	1.61	0.51	4.93	0.14	2.75	1.91	6.77	0.84	7.69	5.05	11.51
hsa-miR-3124-5p	1.86	1.28	3.47	1.46	2.11	2.19	2.16	1.48	0.71	4.15	6.38	7.17	1.84	2.03	2.14	2.08	1.91	1.31	1.99	3.11	3.65	1.97	1.15	0.8	1.01	3.1	1.17	1.67	2.5	0.76	0.72	2.63	1.49	1.7	1.03	0.37	2.85	2.24	0.98	0.28	1.1	4.66	1.35	1.7	2.48	0.7	1.58	0.89	2.6
hsa-miR-3127-5p	0.19	0.85	0.05	0.27	0.05	0.23	0.12	0.33	0.12	0.32	0.05	0.27	0.2	0.19	0.09	0.65	0.09	0.23	0.13	0.49	0.43	1.12	0.11	0.66	0.32	0.22	0.001	0.19	0.42	0.09	0.05	0.28	0.13	0.14	0.23	0.28	0.09	0.62	0.23	0.6	0.14	0.14	0.12	0.53	0.18	0.56	0.05	0.61	0.29
hsa-miR-3130-3p	0.33	1.89	0.16	0.27	0.62	0.14	0.24	0.27	0.29	0.41	0.15	0.63	0.7	0.66	0.57	0.18	0.09	0.59	0.18	0.27	0.52	0.72	0.16	0.33	0.05	0.27	0.24	0.14	0.38	0.09	0.05	0.23	0.26	0.33	0.17	0.14	0.14	0.44	0.29	0.23	0.46	0.09	0.35	0.53	0.14	0.56	0.59	0.09	0.2
hsa-miR-3130-5p	1.44	10.55	2.48	2.05	1.87	2.19	1.62	2.2	2.77	3.22	2.75	1.31	1.34	3.31	0.33	7.67	2.66	2.21	1.73	9.05	1.09	3.09	1.69	1.83	1.38	7.88	2.05	3.96	1.46	2.04	1.01	4.23	1.14	1.51	2.52	1.91	1.45	2.33	1.44	2.41	0.96	2.12	3.46	3.66	1.22	3.02	1.08	2.52	2.3
hsa-miR-3136-5p	0.33	1.04	0.1	0.23	0.1	0.28	0.001	0.11	0.12	0.05	0.05	0.23	0.1	0.14	0.05	0.28	0.05	0.36	0.18	0.31	0.13	0.27	0.05	0.38	0.09	0.53	0.15	0.1	0.28	0.19	0.1	0.05	0.04	0.14	0.06	0.14	0.09	0.09	0.12	0.32	0.14	0.18	0.06	0.001	0.05	0.65	0.1	0.001	0.1
hsa-miR-3150b-3p	0.19	1.32	0.31	0.68	0.19	0.42	0.06	1.15	0.35	0.88	0.25	0.95	0.2	1.23	0.05	0.83	0.19	0.32	0.58	0.67	0.13	0.81	0.11	0.8	0.09	1.42	0.2	0.48	0.28	0.09	0.1	0.66	0.09	0.38	0.06	0.33	0.23	1.06	0.12	0.6	0.18	0.28	0.35	0.21	0.05	0.65	0.2	0.47	0.15
hsa-miR-3157-5p	2.32	4.64	3.52	1.37	2.88	2.57	2.1	2.36	2.12	2.26	5.84	2.66	1.84	2.98	2.42	5.91	1.17	1.08	3.1	6.08	4.3	0.85	1.36	0.47	1.52	8.85	1.56	4.44	3.64	0.71	2.78	1.22	2.84	2.84	1.78	1.21	5.25	2.64	2.76	0.93	2.1	6.69	4.69	2.6	3.66	1.49	1.33	1.59	4.26
hsa-miR-3173-5p	0.14	7.52	1.19	0.32	1.1	1.45	0.84	2.09	0.47	1.43	1.62	3.47	0.94	1.89	1.23	5.08	1.21	3.52	1.68	8.7	1.78	1.61	0.93	0.23	0.46	4.38	3.17	1.43	1.84	0.28	0.14	0.47	1.22	2.03	1.89	0.47	0.36	2.82	1.73	2.55	0.09	4.25	2.52	2.49	0.9	1.3	0.44	1.17	1.03
hsa-miR-3174	0.05	0.99	0.21	0.001	0.53	1.49	0.06	0.16	0.24	0.37	0.15	0.05	0.4	0.38	0.001	0.23	0.14	0.23	0.18	0.22	0.04	0.27	0.05	0.05	0.37	0.31	0.1	0.29	0.05	0.09	0.1	0.61	0.17	0.76	0.06	0.37	0.001	0.31	0.12	1.2	0.05	0.001	0.23	2.23	0.14	0.42	0.1	0.61	0.2
hsa-miR-3176	0.33	2.18	0.52	0.82	0.38	1.26	0.3	0.16	0.41	0.88	0.25	0.32	0.25	0.28	0.14	0.23	0.7	0.36	0.18	0.35	0.09	0.31	0.44	0.99	0.41	0.31	0.1	0.1	0.09	1.04	0.14	0.28	0.001	0.19	0.4	0.51	0.05	0.13	0.23	0.56	0.18	0.23	0.35	0.85	0.09	0.88	0.54	1.03	0.24
hsa-miR-3177-3p	0.46	3.26	1.03	0.59	1.2	1.96	0.48	1.32	0.06	0.6	0.74	0.86	0.3	1.18	0.43	1.29	0.65	1.04	0.93	1.02	0.52	1.3	0.38	1.03	0.51	1.59	1.12	0.57	1.09	1.28	0.001	0.52	0.31	0.85	1.03	1.3	0.36	0.26	0.35	4.77	0.37	0.65	0.53	3.61	0.45	1.35	1.18	1.45	0.59
hsa-miR-3180	0.37	8.51	0.57	0.23	0.1	0.56	0.48	0.11	0.06	0.64	0.15	0.54	0.15	1.75	0.09	0.18	0.14	0.05	0.35	0.001	0.17	0.36	0.38	6.44	0.46	0.84	0.1	0.05	0.33	0.19	0.1	0.99	0.17	0.9	0.69	0.88	0.23	0.04	1.04	0.28	0.73	0.14	10.43	0.8	0.18	40.49	0.1	0.14	0.1
hsa-miR-3182	0.74	0.95	0.47	5.48	1.58	2.85	2.4	26.64	2	6.45	0.15	0.001	2.04	1.7	0.28	0.32	1.4	14.41	0.04	0.58	0.26	8.59	1.69	22.5	1.15	0.62	0.001	0.1	0.24	1.23	0.72	6.95	0.04	0.9	0.46	7.58	0.18	0.09	1.5	10.27	0.46	0.32	0.12	11.88	0.23	1.63	1.48	5.33	0.05
hsa-miR-3184-3p	371.36	8.89	1.19	383.62	207.13	253.38	78.92	112.34	84.79	35.88	2.01	66.45	0.1	112.01	29.25	334.66	210.39	166.42	61.91	3.55	46.79	14.98	0.98	328.87	26.41	638.02	380.19	569.66	349.06	4.36	7	66.83	227.86	229.73	9.8	188.84	23.6	332.8	2.99	391.42	112.81	4.34	83.68	117.29	182.59	18.41	0.79	21.83	5.63
hsa-miR-3184-5p	0.56	0.43	0.31	0.37	0.24	0.75	0.3	0.11	0.06	0.41	0.25	0.09	0.1	0.14	0.05	0.42	0.42	0.68	0.53	0.27	0.001	0.67	0.27	0.19	0.41	0.62	0.15	0.62	0.33	0.52	0.24	0.33	0.26	0.28	0.52	0.6	0.27	0.18	0.35	0.42	0.001	0.32	0.12	0.21	0.23	0.46	0.3	0.14	0.05
hsa-miR-3187-3p	1.58	4.97	1.76	3.01	2.54	12.93	1.26	1.43	1.24	13.45	1.03	1.04	1.59	4.11	0.85	2.08	1.31	3.07	1.46	4.48	1.26	13.95	2.35	1.93	1.33	1.73	1.12	0.81	1.42	5.78	0.67	9.77	1.05	3.78	0.97	4.51	1.13	0.97	0.17	4.63	1.6	1.48	2.64	10.6	1.17	6.93	2.22	7.76	1.86
hsa-miR-3188	0.51	0.9	1.35	1.37	0.58	3.64	0.001	0.22	0.12	1.38	0.49	1.49	0.55	0.66	0.05	0.18	0.89	1.67	0.62	0.13	0.7	2.15	0.001	0.001	0.64	2.26	1.32	1.62	0.57	0.57	0.29	0.42	0.79	7.1	0.63	0.37	0.45	2.16	0.12	2.27	0.27	0.32	0.94	5.67	0.5	0.33	0.35	1.64	1.08
hsa-miR-3191-5p	0.05	0.19	0.16	0.18	0.19	0.28	0.06	0.27	0.06	0.46	0.001	0.18	0.25	0.05	0.09	0.37	0.09	0.14	0.13	0.18	0.13	0.27	0.05	0.28	0.18	0.4	0.2	0.33	0.14	0.09	0.1	0.33	0.17	0.14	0.001	0.14	0.23	0.18	0.29	0.42	0.14	0.18	0.41	0.27	0.05	0.14	0.1	0.28	0.001
hsa-miR-3194-3p	1.07	2.84	0.67	0.68	0.38	0.75	0.66	0.05	1.71	0.69	0.44	0.41	0.4	0.38	0.09	0.05	0.98	0.86	0.35	0.44	0.35	0.22	2.62	0.47	1.7	2.92	0.44	0.14	0.47	0.19	0.05	0.09	0.39	0.43	0.46	0.37	0.09	0.001	0.58	1.48	0.32	0.14	0.47	0.53	0.32	0.28	0.59	0.47	1.86
hsa-miR-32-3p	0.28	0.38	0.47	0.46	0.86	0.61	0.18	0.27	0.12	0.14	0.69	0.32	0.3	0.52	0.33	0.14	0.37	0.45	0.22	0.09	0.48	0.72	0.49	0.28	0.28	0.4	0.49	2.39	0.09	0.14	0.29	0.23	1.05	0.33	0.11	0.51	0.18	0.92	0.46	0.32	0.55	0.32	0.41	0.37	0.23	0.09	0.001	0.14	0.2
hsa-miR-32-5p	74.52	184.03	32.96	48.77	120.89	236.53	26.87	22.19	91.15	54.44	115.13	178.84	76.82	51.7	50.29	81	52.65	175	103.84	109.62	69.7	190.52	113.87	103.45	93.49	214.87	79.78	440.74	92.68	36.71	43.86	47.62	64.77	93.48	73.58	59.92	84.39	90.93	110.87	172.06	116.74	180.61	107	231.93	67.25	97.57	60.69	67.17	66.03
hsa-miR-3200-3p	1.44	10.55	1.29	4.11	1.15	3.88	0.9	1.87	1.41	7.19	0.78	6.58	0.55	8.08	0.28	1.52	0.65	19.83	1.37	7.72	0.78	31.71	2.95	0.52	2.21	6.91	0.54	9.4	1.89	6.77	1.01	21.98	1.71	6.67	1.78	1.26	1.4	11.44	0.92	1.8	1.46	0.51	1.46	0.64	0.63	13.29	0.54	4.95	1.27
hsa-miR-3200-5p	0.23	0.8	0.16	0.27	0.34	0.37	0.06	0.33	0.35	0.14	0.34	0.05	0.2	0.47	0.19	0.23	0.33	1.54	0.27	0.35	0.22	2.1	0.44	0.7	1.29	1.64	0.2	0.14	0.47	0.47	0.43	2.02	0.17	0.85	0.17	0.51	0.27	0.75	0.17	0.42	0.37	0.09	0.53	0.001	0.14	1.58	0.2	0.51	0.15
hsa-miR-320a	1123.76	540.18	991.54	890.38	603.12	494.07	344.53	332.14	300.85	378.05	504.05	615.02	409.84	536.66	396.36	802.78	647.6	1248.34	807.97	775.98	667.83	1268.65	543.65	726.06	933.12	1059.53	709.93	1234.61	913	886.95	372.57	383.29	744.66	747.81	832.13	670.53	802.77	491.95	351.55	329.54	575.38	311.31	1143.3	605.8	591.4	589.87	572.47	581.21	652.22
hsa-miR-320b	14.08	6.24	11.12	15.33	6.23	5.46	5.23	6.21	4.01	3.32	5.64	7.3	4.12	6.24	4.32	15.84	9.56	18.88	11.52	10.65	12.48	21.96	8.68	10.48	15	17.66	9.37	12.31	15.72	10.42	3.93	5.45	11.02	12.3	14.67	8.7	10.46	11.36	7.14	4.63	7.17	3.14	17.17	6.42	9.85	8.92	8.04	8.18	9.06
hsa-miR-320c	1292.46	462.05	1174.22	797.44	626.66	435.89	430.54	447.4	362.24	531.11	533.39	328.11	567.27	644.56	376.6	622.08	674.83	983.17	629.06	630.69	507.07	997.99	631.16	732.73	779.27	863.47	858.75	683.51	824.9	997.92	350.61	491.21	681.42	548.88	917.34	701.1	680.25	318.31	295.1	311.86	600.63	276.64	800.09	969.29	470.27	451.39	746.12	491.32	581.04
hsa-miR-320d	54.22	23.7	43.98	61.78	23.78	35.06	12.92	29.89	15.2	18.24	31.49	27	20.31	48.11	13.91	40.78	27.74	32.62	30.18	33.41	41.96	62.7	36.96	51.3	54.38	66.53	42.5	30.68	61	98.94	21.48	29.4	30.53	32.74	62.52	28.94	29.4	19.28	16.87	10.41	24.21	15.33	53.68	32.13	31.12	36.58	38.16	35.15	27.68
hsa-miR-320e	0.84	0.57	0.93	1.19	0.48	1.4	0.42	0.55	0.24	0.18	0.39	0.36	0.3	2.41	0.19	0.42	0.61	0.63	0.49	0.53	0.57	1.16	0.49	1.64	0.83	0.89	0.44	0.52	0.52	2.46	0.38	0.66	0.48	0.28	0.69	0.51	0.5	0.35	0.23	0.42	0.55	0.23	0.64	0.85	0.45	1.16	0.54	0.75	0.49
hsa-miR-323a-3p	3.72	6.39	10.5	7.53	81.83	837.79	3.19	1.54	3.89	1.06	4.61	0.68	1.54	8.55	2.99	3	1.68	9.31	2.84	5.01	9.48	3.67	3.88	2.96	4.14	2.3	2.39	2.43	5.9	3.03	3.12	9.72	5.55	328.89	4.7	14.14	3.58	9.51	5.36	27.67	7.86	1.25	4.69	7	3.61	5.9	5.77	6.87	2.79
hsa-miR-323a-5p	0.33	0.33	0.67	4.06	1.82	12.98	0.18	0.16	0.001	0.23	0.39	0.32	0.05	0.8	0.001	0.23	0.19	4.07	0.09	0.4	0.57	0.09	0.55	0.14	0.18	0.09	0.29	0.05	0.28	0.001	0.1	0.05	0.04	1.18	0.63	0.98	0.14	3.17	0.29	0.28	0.37	0.18	0.76	0.27	0.14	0.37	0.39	0.28	0.34
hsa-miR-324-3p	114.95	83.2	101.46	89.06	59.25	64.9	39.13	36.2	28.87	57.62	55.92	57.53	41.76	41.5	39.51	39.81	36.84	83.93	61.2	82.07	37.44	91.82	103.34	112.29	100.99	76.89	50.26	32.92	75.02	71.42	20.95	46.16	55.85	85.49	75.92	74.02	45.93	23.86	37.2	32.07	43.25	23.68	94.11	113.31	31.34	41	48.17	55.02	97.72
hsa-miR-324-5p	56.68	95.78	58.62	57.31	38.44	90.86	24.58	46.04	30.34	81.2	18.84	41.25	24.73	32.42	18.61	21.89	19.68	105.62	24.82	36.2	15.48	104.16	72.22	64.69	41.41	37.85	20.59	60.55	33.95	46.51	11.84	51.66	21.04	117.18	39.37	62.76	22.24	24.21	27.13	26.89	21.05	14.31	35.86	139.77	15.67	42.21	25.64	67.64	48.74
hsa-miR-326	69.27	22.75	38.54	36.91	15.15	13.03	9.8	11.87	14.61	11.05	11.87	2.61	14.15	13.28	13.34	10.11	11.75	12.6	16.93	36.11	10.48	9.57	49.89	24.52	23.97	12.7	12.25	3.72	23.8	35.71	13.18	12.35	20.38	12.73	21.32	53.22	13.45	11	22.23	16.57	19.96	4.62	24.85	37.49	9.48	11.16	18.59	19.45	35.22
hsa-miR-328-3p	124.66	76.86	176.94	189.76	58	101.6	85.89	243.37	32.64	154.11	97.92	474.54	96.49	140.18	46.68	232.7	120.4	294.53	96.22	279.41	130.54	52.73	63.21	62.25	75.45	196.68	133.98	149.16	134.09	61.38	11.6	117.45	73.78	70.77	217.92	48.43	40.31	183.37	38.99	25.22	26.67	212.33	172.22	75.88	66.88	66.14	51.72	78.95	136.71
hsa-miR-329-3p	1.95	0.9	1.45	0.68	4.51	32.82	0.06	0.16	1.3	0.18	0.2	0.05	0.55	0.57	0.43	0.18	0.05	0.95	0.13	0.18	0.3	0.54	1.09	1.03	1.52	0.22	0.2	0.19	0.47	0.66	0.62	0.33	0.44	6.39	0.11	2.65	0.18	0.09	1.09	2.41	1.14	0.09	0.23	0.27	0.27	0.74	0.89	0.42	0.69
hsa-miR-330-3p	8.22	13.57	9.26	7.57	6.85	6.02	5.35	18.84	8.13	9.58	4.12	4.01	7.75	20.13	2.8	6.1	5.36	12.65	4.74	5.99	5.22	10.15	11.25	10.2	9.85	19.08	4.39	3.67	7.79	8.67	3.5	17.52	5.99	7.1	5.73	12.7	4.3	5.06	4.32	5.46	5.3	1.66	7.85	6.68	4.61	16.36	7.84	13.28	9.55
hsa-miR-330-5p	6.37	15.51	9.73	26.74	5.61	8.68	7.75	33.4	7.37	10.04	4.32	7.66	6.26	19.09	2.85	13.11	7.74	33.02	5.01	13.53	8.22	16.77	17.8	15.74	12.97	42.58	8.78	4.82	8.64	15.63	5.18	54.71	8.35	10.6	8.25	19.45	6.52	44.28	7.2	4.72	6.85	5.63	9.9	23.97	6.86	33.1	9.02	17.72	6.81
hsa-miR-331-3p	35.03	50.8	39.84	30.71	12.8	12.05	12.86	16.54	10.96	22.61	13.69	18.3	11.17	16.78	16.14	21.38	18.98	30.63	16.89	18.46	10.35	16.68	20.47	41.2	12.28	9.52	16.54	5.25	22.1	20.65	2.11	20.1	18.28	26.16	33.41	25.12	12.05	7.83	16.59	27.4	10.23	10.9	26.37	23.65	7	23.89	19.52	19.96	20.23
hsa-miR-331-5p	1.9	2.79	1.19	1.28	0.58	1.4	0.72	1.59	0.47	1.66	0.59	0.63	0.3	2.08	0.85	0.65	1.26	3.21	1.64	0.8	0.57	2.24	0.38	2.91	0.55	0.66	0.88	1.38	0.85	1.28	0.58	1.97	1.57	2.03	1.2	2.05	1.22	0.26	0.75	3.05	0.59	0.28	1.58	0.74	0.59	0.79	0.69	0.84	0.49
hsa-miR-335-3p	13.89	31.5	20.44	14.65	5.8	8.5	3.85	8.02	10.02	2.67	7.7	6.09	11.62	32.33	7.22	9.05	10.4	19.42	16.44	16.33	9.96	8.63	15.94	2.49	9.98	37.89	7.47	2.43	7.93	1.8	5.37	4.93	8.05	16.27	14.84	13.4	4.57	8.49	11.63	14.3	8.68	2.26	10.08	18.61	8.31	8.13	11.54	29.31	11.66
hsa-miR-335-5p	118.06	98.85	143.41	75.92	55.41	33.24	55.72	29.23	96.1	23.9	62.79	20.11	67.84	99.53	67.62	44.75	67.1	87.59	107.83	70.5	78.1	45.89	105.08	16.3	70.67	67.99	69.58	22.47	49.25	10.04	30.92	17	85.72	75.65	115.69	136.87	25.23	31.03	115.3	68.31	96.46	13.62	73.48	62.78	79.76	35.56	128.29	83.06	137.74
hsa-miR-337-3p	24.39	47.58	91.88	6.02	146.83	2235.53	46.22	21.1	88.73	9.86	52.83	7.08	46.13	108.66	31.25	51.72	30.59	29.14	42.19	113.44	128.23	12.34	59.45	9.26	49.64	17.97	37.08	12.21	67.09	7.29	29.39	26.63	40.94	630.77	63.09	84.16	21.88	3.61	65.94	49.15	55.26	23.59	44.07	39.45	57.18	62.75	86.92	72.13	38.55
hsa-miR-337-5p	5.02	3.12	7.55	1.1	14.76	84.79	2.82	1.26	6.48	0.97	3.29	0.32	3.33	3.88	2.42	2.59	1.31	3.21	2.93	4.97	5.65	1.21	5.68	0.8	4.6	1.02	1.81	0.86	7.46	1.66	3.83	2.63	3.19	46.93	4.53	10.79	3.26	0.001	4.32	5.09	6.12	0.69	3.98	3.92	3.48	3.58	5.77	4.53	4.11
hsa-miR-338-3p	11.43	13.34	12.42	18.11	9.49	7	7.21	5.44	21.33	5.02	11.72	4.73	10.13	10.92	8.45	9.19	6.39	16.08	14.45	16.15	9.35	17.84	31.33	4.65	16.33	13.77	11.66	8.78	24.13	16.25	2.59	8.03	19.77	9.41	8.88	4.56	13.5	11.71	13.48	6.34	19.14	6.23	18.75	8.91	9.94	21.1	6.8	7.15	30.22
hsa-miR-338-5p	4.41	3.03	6.31	0.82	0.72	0.42	0.36	1.48	4.3	2.95	0.39	0.41	1.24	0.66	1.99	3.56	1.82	1.17	5.41	6.65	5.61	0.22	0.11	1.83	3.86	3.36	8.49	1.96	7.22	0.52	1.05	0.66	11.15	1.14	4.99	0.05	8.74	5.02	0.06	10.13	0.64	0.42	0.88	5.67	3.97	9.34	1.53	5.61	2.11
hsa-miR-339-3p	26.85	88.02	60.27	68.16	47.79	84.18	26.15	26.86	31.88	37.68	33.46	38.28	15.79	32.09	18.76	46.46	22.9	76.39	32.49	93.21	24.52	73.35	30.41	37.82	25.35	39.75	16.3	25.34	49.43	58.21	12.61	53.68	15.74	40.07	25.33	32.57	27.45	51.37	15.03	51.32	26.03	48.75	30	64.74	25.65	53.59	36.04	80.59	50.6
hsa-miR-339-5p	53.66	68.39	36.99	67.89	15.05	25.03	12.86	17.52	99.58	102.2	2.89	4.55	60.49	105.96	5.75	14.32	10.68	75.03	5.01	5.72	2.17	49.06	103.39	97.63	53.74	89.77	4.49	25.48	5.05	32.73	3.74	14.42	19.77	35.2	6.76	34.47	6.48	10.26	41.41	51	12.7	3.37	17.87	11.98	3.16	12.83	15.68	16.59	82.24
hsa-miR-33a-3p	2.56	2.98	5.02	3.7	1.82	1.63	1.2	0.71	1.12	1.66	2.99	4.73	0.84	1.8	3.75	1.25	1.21	2.57	2.44	1.42	1.87	3.85	2.02	4.37	1.24	1.95	1.17	7.35	2.27	1.71	1.82	0.8	2.71	2.65	2.18	1.58	2.54	2.51	2.82	1.34	2.28	1.99	2.34	3.87	6.01	1.63	0.79	1.31	4.46
hsa-miR-33a-5p	122.33	336.19	91.01	293.1	143.04	236.95	130.31	146.24	114.01	281.88	206.38	1122.92	123.8	172.6	111.64	292.04	101.65	170.49	180.33	211.66	140.71	340.29	132.82	292.37	80.97	202.34	134.08	105.88	176.11	139.05	73.2	107.45	184.25	228.31	173.57	126.59	199.98	66.15	98.77	402.75	178.67	168.1	285.96	1317.34	206.8	267.32	82.78	164.35	205.93
hsa-miR-33b-3p	2	1.94	10.19	0.59	5.46	1.77	4.87	2.47	3.89	2.95	8.68	1.94	2.68	1.13	2.47	2.03	3.08	0.54	7.36	12.56	7.57	0.94	1.69	3.24	5.06	1.73	4.64	0.29	3.68	0.38	1.97	1.08	2.89	0.8	4.24	0.47	4.44	0.22	2.99	1.43	4.02	8.26	9.79	0.74	9.75	3.35	5.18	0.84	7.69
hsa-miR-33b-5p	0.46	1.94	6.78	5.93	2.06	0.33	1.62	4.34	5.42	5.11	3.68	0.36	4.72	0.19	4.37	0.05	0.93	0.14	3.68	0.09	0.48	0.45	4.04	10.2	0.18	0.35	4.83	0.24	2.46	1.33	0.14	0.61	0.83	0.38	7.16	1.54	4.3	0.04	4.72	7.13	4.11	1.15	3.4	3.92	1.58	5.16	2.96	0.75	7.98
hsa-miR-340-3p	31.78	71.84	39.32	27.47	39.16	53.88	30.29	32.19	51.38	68.49	93.8	48.42	49.96	44.62	44.11	80.77	67.85	135.52	78.8	237.75	86.01	133.45	33.24	13.77	23.92	91.32	76.21	35.98	58.59	9.28	18.22	38.84	55.45	60.37	115.18	21.59	50.5	95.2	65.19	29.34	24.16	87.17	97.8	73.54	42.18	64.89	28.99	66	32.18
hsa-miR-340-5p	349.62	362.68	215.07	261.57	202.09	186.2	145.64	152.72	198.5	184.51	419.04	135.92	196.6	139.85	195.12	177.98	272.78	547.6	331.64	424.52	282.43	332.65	123.32	70.14	109.68	187.69	354.58	188	235.7	72.32	118.79	89.51	216.7	177.83	445.98	230.85	244.69	303.31	266.19	118.52	257.82	231.16	282.38	200.38	189.77	173.57	187.26	212.64	197.16
hsa-miR-342-3p	751.51	939.19	902.5	672.33	716.68	735.54	880.19	1739.05	1178.7	735.98	655.68	588.01	1458.17	1317.15	389.28	698.42	1009.07	875.52	781.16	1214.21	795.84	2472.81	1623.81	588.54	1710.08	2867.96	1007.81	524.43	1084.58	404.66	238.68	1234.79	1303.28	1042.55	981.23	1380.28	489.46	624.13	1216.13	669.87	656.4	415.01	951.8	702.31	709.49	838.64	1125.41	1060	949.5
hsa-miR-342-5p	30.11	19.2	25.71	28.42	12.32	14.47	16.23	34.5	7.6	11.88	20.41	19.07	20.76	28.26	6.51	23.87	26.3	25.03	27.48	44.45	36.53	39.27	22.93	7.19	26.82	64.85	33.57	4.44	41.6	9.09	6.23	15.26	45.18	36.43	50.94	38.15	16.22	51.63	13.13	11.89	16.26	9.74	51.39	27.36	11.92	12.6	21.15	22.44	17.24
hsa-miR-345-5p	239.09	552.72	392.17	97.18	186.66	366.14	160	134.81	142.06	189.49	266.13	444.88	138.15	246.14	115.67	297.16	166.14	458.65	176.03	342.14	213.16	478.13	191.66	63.85	119.48	91.1	169.99	191.86	170.97	42.58	147.12	398.13	204.63	515.9	299.52	99.65	285.41	510.53	190.57	580.18	123.91	902.59	303.01	168.19	163.62	83.48	145.55	144.72	247.37
hsa-miR-346	1.21	0.85	0.21	0.55	0.14	0.79	0.48	1.59	0.29	6.95	0.49	0.27	0.2	1.7	0.14	0.18	0.93	2.12	0.93	0.67	0.17	7.78	0.93	0.19	0.51	4.69	0.1	0.33	1.51	0.47	0.1	0.05	0.04	0.24	0.52	0.51	0.32	16.59	0.17	0.05	0.18	0.18	0.12	0.05	0.54	0.42	0.2	2.94	0.69
hsa-miR-34a-3p	9.39	15.09	6.98	9.13	6.04	6.16	4.09	3.74	7.31	4.51	4.17	10.77	3.48	6.24	3.09	10.16	4.1	5.65	6.29	8.07	3.52	21.38	9.83	11.56	10.54	8.28	5.42	21.76	10.01	5.02	1.29	3.76	6.52	8.33	9.11	9.03	3.49	7.09	9.62	1.57	8.91	16.21	11.13	4.77	4.47	9.16	5.62	5.33	4.8
hsa-miR-34a-5p	9974.91	26812.1	11182.5	15692.7	10327.2	11214.9	6684.84	16065.3	12130.2	12934.5	6749.15	35155.2	9216.8	14477.1	5474.28	22320.4	7640.81	6659.46	6519.41	8726.69	10438.7	41734.2	11384.8	17560.2	14094.1	10158.3	12487.5	35735.3	10780.5	10237.9	4664.78	16738.2	8787.29	12044.4	8937.45	24150	8443.25	19851.4	4388.45	1567.7	15369.9	45740.1	8226.26	13648.9	8361.79	12726	10696.4	8720.82	4757.09
hsa-miR-34b-3p	0.09	0.43	0.16	1.23	0.19	0.75	0.18	5.44	0.18	0.41	0.1	0.54	0.45	2.41	0.09	0.69	0.14	1.31	0.35	3.02	0.13	1.52	1.2	0.75	0.51	11.82	0.1	0.57	0.57	0.9	0.1	5.96	0.13	0.28	0.4	1.21	0.18	0.75	0.4	0.32	0.69	0.46	0.06	1.48	0.09	8.09	0.1	1.5	0.24
hsa-miR-34b-5p	0.56	1.18	0.21	3.33	0.43	0.7	0.18	18.62	0.41	0.37	0.29	0.5	0.3	3.97	0.14	1.25	0.47	0.9	0.4	2.88	0.35	3.89	0.55	1.27	0.37	7.08	0.29	2.53	1.46	3.5	0.29	12.4	0.61	0.66	0.63	8.47	0.09	0.31	0.35	0.42	1.96	0.55	0.35	1.27	0.41	18.59	1.08	2.66	0.44
hsa-miR-34c-3p	0.56	1.47	0.05	1.92	0.24	1.31	0.12	16.48	0.29	0.78	0.2	0.77	0.7	3.64	0.14	1.2	0.19	1.13	0.27	1.91	0.17	1.92	2.13	1.88	1.2	15.09	0.39	0.91	0.57	1.47	0.34	18.22	0.57	0.47	0.29	2.33	0.001	1.89	0.12	0.19	1	0.97	0.18	1.7	0.27	10.88	0.74	2.24	0.24
hsa-miR-34c-5p	0.6	0.99	0.16	2.37	0.24	0.7	0.12	14.89	0.35	0.69	0.2	0.41	0.2	3.45	0.001	0.88	0.05	0.99	0.22	2.17	0.09	2.37	0.66	1.36	0.41	6.15	0.24	1.67	0.85	1.42	0.34	8.83	0.61	0.71	0.34	5.21	0.18	1.36	0.52	0.37	1.51	0.51	0.12	0.8	0.5	12.69	0.44	2.24	0.49
hsa-miR-3529-3p	7.53	26.2	8.48	17.11	11.74	31.7	10.16	22.03	20.56	12.8	7.16	26.1	14.55	43.29	5.37	39.21	15.11	15	9.84	13.71	11.31	46.6	10.37	27.01	9.75	98.8	11.08	23.43	8.59	18.33	6.47	22.49	7.3	8.14	9.68	34.89	6.25	7.26	5.99	34.71	10.09	10.43	27.89	8.38	8.45	81.67	8.73	16.22	8.03
hsa-miR-3591-3p	216.37	181.43	240.37	54.75	41.08	36.18	46.28	5	23.21	104.65	74.66	62.66	59	24.81	86.47	48.07	81.14	170.08	156.09	38.38	75.4	33.27	61.25	16.26	32.07	25.98	85.09	211.14	40.56	1.89	62.65	8.97	110.3	212.04	124.86	11.49	109.16	70.64	207.91	75.48	110.3	47.92	218.63	74.76	30.85	12.92	52.8	32.25	137.15
hsa-miR-3591-5p	528.5	620.45	962.46	319.61	470.72	403.58	569.68	58.67	311.39	410.75	1013.89	722.63	476.94	214.29	827.24	692.74	732.13	611.07	902.9	556.11	1238.64	727.68	292.76	100.87	415.77	577.86	1577.51	1416.65	727.07	16.01	283.21	126.32	899.31	384.57	1666.27	44.52	720.15	692	916.76	242.22	624.52	3075.92	1319.74	517.73	589.95	171.94	831.51	312.01	176.19
hsa-miR-3605-3p	1.58	6.1	3.1	1.14	3.55	6.26	1.5	2.75	3.12	4.42	5.49	9.15	3.92	4.06	3.7	6.65	4.8	6.82	6.38	10.56	9.04	13.24	3.38	3.62	2.62	6.68	6.15	7.25	7.55	1.28	1.29	3.33	5.25	5.58	6.65	1.3	2.36	5.02	4.9	3.33	2.28	6.46	7.73	7.74	5.46	7.34	3.7	4.91	1.91
hsa-miR-3605-5p	0.23	0.52	0.72	0.09	0.29	0.28	0.42	0.66	0.59	1.2	0.34	0.32	0.55	0.52	0.14	0.55	0.51	0.54	0.58	0.58	0.39	0.76	0.38	1.03	0.23	0.75	0.2	0.33	0.47	0.47	0.34	1.08	0.35	0.52	0.52	1.07	1	0.75	0.12	0.28	0.59	0.46	0.82	0.58	0.77	0.7	0.64	0.42	0.34
hsa-miR-3607-3p	0.23	0.05	0.21	0.37	0.1	0.001	0.18	0.05	0.18	0.14	0.1	0.05	0.05	0.05	0.05	0.05	0.05	0.41	0.13	0.18	0.26	0.13	0.33	0.19	0.18	0.22	0.24	0.91	0.19	0.19	0.19	0.001	0.09	0.14	0.001	0.23	0.18	0.04	0.06	0.09	0.09	0.14	0.47	0.37	0.09	0.05	0.1	0.001	0.59
hsa-miR-361-3p	11.85	16.41	7.5	43.8	2.68	2.94	3.13	3.13	3.3	2.72	0.69	1.08	1.44	2.41	2.99	1.99	3.31	10.3	2.26	2.71	0.78	7.74	7.53	11.42	4.28	4.03	1.07	9.73	1.98	32.49	1.82	7.94	2.27	5.39	2.58	16.42	1.04	1.5	5.99	3.7	3.33	0.6	3.75	10.02	1.13	2.79	3.45	7.76	4.6
hsa-miR-361-5p	178.55	224.81	134.31	182.23	94.82	124.1	70.8	172.22	94.68	132.14	97.57	134.57	124.7	205.78	89.03	92.77	109.72	290.74	168.54	143.16	127.1	231.93	150.34	182.43	147.91	260.11	118.42	257.42	169.08	178.89	96.64	151.5	138.37	208.25	153.34	163.95	150.06	237.46	218.39	163.08	140.21	127.24	161.79	270.05	174.6	156.97	108.02	248.16	173.06
hsa-miR-3611	0.88	1.84	0.62	0.96	0.34	0.47	0.3	0.22	0.29	0.88	0.69	0.32	0.2	0.24	0.24	0.37	0.42	1.26	0.53	0.84	0.17	0.85	0.55	0.56	0.41	0.62	0.63	1.34	0.42	0.43	0.14	0.23	0.57	0.43	1.26	0.33	0.18	0.13	1.84	1.2	0.37	0.23	0.64	0.21	0.09	0.09	0.2	0.19	0.78
hsa-miR-3613-5p	116.48	145.68	132.08	88.51	95.06	226.21	79.16	222.27	90.97	448.66	219.33	259.5	68.88	373.23	110.59	183.33	130.19	170.8	110.66	490.67	167.33	334.7	87.12	180.5	54.93	135.37	184.24	251.17	69.78	195.79	64.14	175.77	114.19	272.83	298.48	288.67	105.63	340.19	114.95	55.35	96.73	324.29	201.28	144.97	83.73	73.77	62.42	188.47	126.97
hsa-miR-3614-3p	1.12	0.57	1.09	0.5	0.19	0.33	0.84	0.44	2	0.88	0.93	0.9	0.7	1.09	0.47	0.32	0.56	0.45	1.02	2.48	0.7	0.22	0.93	0.28	1.01	1.51	1.17	1.67	0.57	0.24	0.34	0.61	0.52	0.76	2.46	1.12	0.41	0.04	1.79	0.19	0.82	0.32	1.58	0.16	0.45	0.46	0.69	0.37	0.73
hsa-miR-3614-5p	0.65	0.33	1.03	0.18	1.15	0.37	1.14	0.38	0.71	0.41	1.18	1.04	1.89	0.76	0.28	0.88	1.4	0.09	0.62	1.46	0.61	0.001	0.6	0.47	0.92	1.11	1.41	0.24	0.99	0.001	0.29	0.94	0.87	0.28	1.89	0.47	0.54	0.04	0.75	0.05	0.5	0.37	0.94	0.27	0.5	0.56	1.33	0.23	0.1
hsa-miR-3615	14.45	48.24	30.73	21.63	43.57	53.97	37.57	19.28	32.47	41.04	53.52	46.98	30.79	58.13	15.81	76.01	20.14	47.52	35.54	35.98	28.22	43.87	82.54	45.57	51.71	168.44	28.15	18.23	46.41	22.45	5.42	22.35	17.54	33.87	59.48	17.63	10.1	7.26	29.95	22.44	23.61	41.55	43.6	45.39	23.35	65.12	43.34	48.75	12.93
hsa-miR-362-3p	11.62	11.64	5.59	23.22	4.12	2.43	1.98	1.1	3	3.13	2.6	1.76	1.34	3.4	1.38	6.23	2.28	23.35	3.37	5.37	1.87	11.58	10.92	7.33	6.9	12.7	2.44	18.89	4.34	15.63	0.86	5.12	5.55	7.33	4.41	13.4	2.04	6.56	10.48	12.82	3.47	2.17	5.86	3.61	2.98	3.11	2.91	2.48	5.19
hsa-miR-362-5p	56.68	128.13	64.52	180.72	63.13	113.78	45.44	57.68	71.29	116.53	45.62	87.14	32.58	79.73	33.43	90.14	32.03	289.47	64.57	88.37	55.27	313.15	57.97	83.58	41.54	154.18	36.69	84.88	68.18	146.06	27.9	180.14	39.62	118.6	54.44	92.53	55.67	134.47	23.61	296.55	52.98	93.12	78.58	110.5	67.38	135.13	46.54	99	54.86
hsa-miR-3620-3p	0.84	0.9	0.36	0.82	0.43	2.8	0.24	0.27	0.001	1.57	0.15	0.32	0.3	0.76	0.09	0.37	0.33	1.85	0.31	1.46	0.22	2.42	0.6	0.38	0.18	0.62	0.1	0.57	0.24	0.24	0.05	0.52	0.57	1.99	0.23	0.47	0.14	0.66	0.12	0.88	0.18	0.18	0.29	2.33	0.05	0.46	0.44	0.7	0.34
hsa-miR-3622a-3p	0.05	0.09	0.21	0.001	0.001	0.47	0.001	0.11	0.18	0.05	0.25	0.23	0.15	0.71	0.28	0.28	0.19	0.14	0.04	0.44	0.3	0.27	0.001	0.001	0.14	0.13	0.24	0.05	0.19	0.001	0.05	0.05	0.09	0.14	0.29	0.05	0.001	0.4	0.12	0.32	0.27	0.05	0.18	0.48	0.32	0.001	0.2	0.28	0.73
hsa-miR-363-3p	32.66	30.03	45.11	220.6	46.83	52.39	37.21	31.64	26.1	11.98	55.09	21.14	75.98	76	18.8	152.44	44.25	123.05	48.75	173.6	70.01	455.99	45.96	33.17	69.47	745.76	45.43	15.75	74.22	28.51	40.46	30.48	48.41	32.97	52.03	24.01	42.94	49.34	45.04	22.12	45.22	47.05	50.98	35.31	46.43	60.94	52.76	96.53	43.6
hsa-miR-3656	18.12	9.18	22.66	7.48	11.7	7.75	5.59	1.54	6.3	10.13	5	3.65	7.45	7.47	4.37	5.5	7.51	19.15	9.13	13.04	4.87	3.58	25.77	62.06	15.27	4.78	9.61	2.72	30.22	22.35	6.52	3.48	22.83	10.79	12.55	7.3	9.06	1.54	2.53	7.91	8.04	2.4	6.15	3.66	10.39	5.44	17.31	6.78	32.57
hsa-miR-365a-3p	32.29	11.16	94.32	60.77	6.14	4.81	19.71	30.6	34.65	27.22	0.98	21.73	3.03	34.08	0.9	5.63	21.4	112.48	8.51	30.66	4.78	13.64	35.65	68.41	2.76	2.12	25.18	379	18.04	167.09	19.41	4.74	45.44	1.51	3.95	57.87	16.13	25.75	168.86	54.33	2.74	5.12	52.21	29.91	7.86	4.74	16.76	140.74	68.82
hsa-miR-365a-5p	1.12	0.66	1.81	0.46	1.25	0.56	0.54	0.22	0.29	0.64	3.24	3.56	0.25	0.38	0.85	4.48	1.03	0.32	1.95	2.48	2	1.25	0.33	0.7	0.74	1.33	1.95	0.91	1.18	0.71	0.14	0.75	2.06	0.9	3.72	0.37	1.59	1.72	0.52	0.56	1.14	3.69	2.64	0.32	0.63	1.77	0.64	0.28	0.1
hsa-miR-365b-3p	164.33	59.74	11.43	11.5	22.43	54.58	2.89	1.7	4.71	3.55	19.77	10.73	8.74	3.4	38.65	20.04	3.31	4.29	30.98	3.99	15.31	76.39	2.4	8.74	32.48	52.77	1.56	9.4	4.77	28.46	6.76	22.59	3.54	42.39	49.91	12.51	6.48	1.28	6.16	1.76	36.54	24.15	4.86	4.88	1.85	42.76	4.73	1.4	3.87
hsa-miR-365b-5p	1.72	6.01	2.64	0.59	1.92	2.85	2.04	0.93	0.77	3.09	7.65	5.73	1.54	0.71	1.99	4.99	2.8	2.48	4.48	10.51	5.35	2.5	1.04	1.22	2.3	2.7	6.98	2	3.45	0.62	0.48	0.75	4.2	2.79	9.23	1.72	1.45	13.95	1.15	6.94	1.46	6.09	5.04	5.51	3.7	1.67	2.02	2.62	1.52
hsa-miR-3661	0.09	0.19	0.26	0.05	0.14	0.51	0.24	0.11	0.12	0.51	0.05	0.45	0.1	0.24	0.28	0.18	0.09	0.09	0.22	0.18	0.22	0.18	0.05	0.05	0.41	1.42	0.39	0.33	0.19	0.001	0.05	0.28	0.17	0.47	0.23	0.14	0.09	0.13	0.001	3.01	0.14	0.05	0.06	2.07	0.18	0.37	0.001	0.23	0.15
hsa-miR-3664-3p	1.12	9.41	1.45	3.6	1.01	1.03	1.5	0.11	2.36	2.16	1.32	0.9	1.19	1.51	0.85	3.69	0.79	1.67	1.2	2.17	0.96	1.79	1.42	0.05	0.55	1.02	1.37	0.62	1.18	0.99	0.67	0.56	1.05	1.23	2.18	0.65	1.63	1.94	1.67	3.75	2.47	2.17	1.29	1.96	1.58	1.39	1.28	0.47	0.93
hsa-miR-3667-3p	0.23	0.24	0.47	0.001	0.53	0.47	0.3	0.22	0.24	0.05	0.15	0.14	0.1	0.76	0.09	0.28	0.37	0.41	0.18	0.09	0.09	0.13	0.38	0.23	0.05	0.93	0.15	0.19	0.09	0.33	0.14	0.05	0.26	0.66	0.34	0.14	0.14	0.09	0.06	0.001	0.27	0.14	0.82	0.05	0.27	0.19	0.25	0.93	0.2
hsa-miR-3679-5p	0.98	1.94	1.66	3.15	0.43	1.4	0.3	1.37	0.65	1.84	0.34	0.45	0.55	3.69	0.52	1.29	0.51	1.54	0.89	0.62	0.61	2.33	1.09	3.38	0.55	1.06	1.07	1.15	0.9	1.18	0.53	4.88	0.92	0.99	0.74	1.72	1	1.32	0.86	3.01	1.19	0.42	1.88	5.09	0.23	2.56	0.84	0.84	1.22
hsa-miR-3687	3.21	2.79	0.88	0.14	3.6	2.89	1.26	0.11	0.77	0.51	1.18	0.68	0.65	0.61	2.04	2.08	2.56	1.08	1.2	5.5	1.17	0.58	0.82	1.03	0.41	8.72	0.39	0.38	1.37	0.43	4.99	0.14	4.85	1.75	0.63	0.79	0.86	0.22	0.52	3.89	0.46	0.97	0.47	0.32	0.77	1.86	1.63	1.73	1.08
hsa-miR-369-3p	104.82	94.22	253.46	35.72	460.22	4703	116.18	34.33	144.83	17.04	78.88	2.98	22.74	105.77	59.78	21.8	37.68	60.76	41.08	47.96	101.14	24.24	61.25	19.59	46.79	11.2	44.79	30.92	40.56	28.61	48.9	47.99	39.05	833.06	67.44	200.23	28.99	25.44	72.11	113.61	56.18	12.37	40.14	57.69	39.25	34.12	154.12	73.99	75.97
hsa-miR-369-5p	65.37	67.49	121.12	60.41	219.69	2290.95	67.98	34.06	131.98	21.05	81.73	11.45	67.19	169.62	56.93	73.79	43.97	117.59	48.53	133.05	191.94	31.31	89.74	30.21	99.79	26.83	61.63	23.19	84.33	28.65	63.04	50.44	74.65	1244.46	66.64	359.57	47.88	83.28	72.39	108.84	126.51	28.95	57.07	101.59	77.45	98.64	154.96	118.92	59.42
hsa-miR-3690	0.33	1.23	0.52	0.64	0.29	0.47	0.12	0.44	0.35	0.55	0.25	0.05	1.04	2.08	0.52	1.39	0.05	0.05	0.35	0.84	1.61	1.43	0.76	0.42	0.28	1.28	0.15	0.19	1.37	0.66	0.14	0.66	0.44	0.14	0.06	0.28	0.14	0.18	0.23	0.09	0.18	0.001	1	0.74	1.22	1.86	0.84	1.36	0.44
hsa-miR-370-3p	9.01	2.93	10.76	3.19	22.96	108.46	0.9	0.6	1.36	0.92	3.68	0.41	4.82	4.02	2.14	2.45	1.73	4.29	3.46	5.15	7.13	0.72	2.84	1.03	4.88	0.62	3.56	1.19	4.15	2.37	0.62	1.46	3.24	46.36	5.39	12.33	1.99	3.39	1.73	8.75	2.92	0.46	3.11	3.08	1.67	1.49	6.85	2.34	5.98
hsa-miR-374a-3p	13.8	29.32	11.38	7.71	14.76	11.3	11.66	7.97	26.81	24.04	19.57	22.09	12.91	22.35	10.4	17.92	15.43	21.14	9.93	19.25	17.74	16.77	9.33	5.5	5.34	13.28	17.32	35.93	8.07	8.43	6.28	13.9	12.73	8.7	16.5	12.7	11.51	11.71	35.88	9.63	7.26	9.79	17.17	9.65	9.17	6.51	10.85	11.55	17.1
hsa-miR-374a-5p	301.16	331.65	82.73	70.72	79.86	48	32.94	19.78	115.42	79.91	115.53	71.28	42.31	46.51	56.7	55.69	196.31	207.3	52.47	84.51	76.62	113.73	124.9	59.57	43.48	121.11	100.22	431.91	74.08	50.49	18.46	28.04	65.91	52.61	139.36	78.81	34.06	31.47	329.55	85.47	31.1	27.47	152.65	79.22	28.86	25.38	56.11	79.88	147.44
hsa-miR-374b-3p	6.41	11.07	7.76	6.11	6.47	6.35	5.53	10.6	8.84	16.77	9.03	9.56	6.21	16.45	4.42	6.79	6.62	10.66	7.4	11.09	11.09	9.12	5.13	4.89	5.24	11.82	6.73	22.47	5.85	12.41	4.17	12.12	6.74	5.87	7.51	12.14	6.48	5.55	8.35	7.82	8.08	5.54	7.27	7.26	7.86	7.48	7.84	8.55	6.91
hsa-miR-374b-5p	170.37	294.66	138.19	287.03	42.23	81.66	63.05	159.75	142.17	443.69	109.84	234.25	151.46	34.97	83.38	86.96	190.81	11.75	26.46	1.77	53.96	86.54	220.49	8.22	168.06	2.48	114.66	311.86	162.04	10.94	77.95	97.96	6.95	5.01	105.32	175.67	125.42	211.93	137.42	286.69	111.58	14.77	133.25	164.16	81.97	21.01	1.92	120.55	308.89
hsa-miR-374c-3p	237.28	242.26	150.97	13.64	227.98	66.44	54.46	18.4	131.57	15.52	102.48	1.58	6.51	237.73	36.8	82.71	1.54	461.86	152.19	258.02	81.14	188.15	117.59	262.86	27.6	457.94	78.26	638.33	26.72	444.68	43.43	211.75	166.8	169.37	147.95	198.6	59.11	60.21	177.5	7.36	80.84	69.67	140.28	80.6	42.95	130.48	217.73	140.98	51.58
hsa-miR-374c-5p	0.09	0.33	0.16	0.001	0.19	0.05	0.06	0.11	0.12	0.37	0.05	0.36	0.2	0.28	0.05	0.001	0.09	0.27	0.13	0.31	0.26	0.27	0.22	0.09	0.09	0.66	0.15	0.33	0.09	0.05	0.05	0.23	0.09	0.24	0.11	0.09	0.18	0.18	0.35	0.05	0.14	0.14	0.12	0.21	0.09	0.33	0.35	0.37	0.001
hsa-miR-375	1540.33	1417.32	1726.98	618.54	2475.08	760.33	638.98	255.56	351.87	117.4	5273.39	152.15	1889.66	3975.36	1418.24	1739.11	4193.23	165.83	2483.26	111.93	1492.28	765.97	647.92	62.02	374.59	2323.74	2942.25	66.75	839.01	96.48	1543.23	476.51	1845.98	2240.31	1766.38	172.27	3036.06	22.76	1084.12	35.17	1003.78	347.69	3477.61	568.21	2600.25	2805.56	439.45	484.78	3873.28
hsa-miR-376a-3p	74.38	96.39	193.6	28.15	816.81	8006.83	92.26	39.72	117.25	18.01	68.09	7.98	61.68	153.84	29.11	47.06	41.27	66.09	48.17	78.13	130.15	31.66	72.39	30.49	51.16	14.74	48.94	25.05	83.1	29.32	66.39	66.36	63.24	1466.81	63.55	243.17	52.09	16.81	60.93	262.44	124.64	18.79	64.93	90.14	82.6	93.94	166.3	193.52	58.73
hsa-miR-376b-3p	4.04	4.02	8.17	1.05	18.12	138.15	4.21	1.92	5.77	0.64	2.21	0.59	1.59	6.76	1.66	2.03	1.21	2.57	1.68	2.57	4.65	1.07	4.59	1.41	2.39	0.84	1.46	1.19	2.79	1.42	2.59	1.78	1.14	35.2	2.41	13.54	1.27	0.13	6.34	5.37	5.02	0.83	2.75	1.96	2.44	4.14	4.78	4.3	2.55
hsa-miR-376b-5p	2.09	8.84	23.28	4.15	11.31	107.99	2.7	4.94	6.13	0.69	2.55	0.86	1.14	4.54	1.09	3.65	2.52	5.33	0.8	1.82	3.17	0.58	8.13	1.88	4.55	0.44	0.98	0.72	1.37	2.18	1.15	4.18	4.33	53.55	1.66	10.89	4.17	1.89	3.4	4.07	9.59	1.62	4.57	1.91	1.76	7.2	16.37	11.64	1.27
hsa-miR-376c-3p	347.67	280.62	985.48	123.37	1214.63	9287.84	409.62	145.58	496.81	59.69	378.47	28.27	196.75	426.49	200.01	170.49	149.59	166.65	231.08	348.53	541.16	92.84	220.16	63.66	163.92	37.63	188.78	81.35	360.77	131.81	260.25	146.99	259.65	2959.6	283.41	842.9	222.85	14.92	365.14	564.49	539.89	74.88	286.02	227	331.9	326.87	724.03	572.47	274.8
hsa-miR-376c-5p	5.44	0.05	0.21	0.32	7.38	81.89	9.98	0.05	11.9	1.11	3.43	0.09	2.83	12.1	2.8	0.09	0.05	0.32	2.7	6.21	6.74	1.52	0.11	0.001	0.05	1.2	3.03	2	3.82	3.36	4.17	0.05	0.09	0.95	3.95	27.31	0.09	0.62	7.26	4.35	0.14	0.001	0.12	4.35	4.52	0.09	0.15	0.37	6.47
hsa-miR-377-3p	14.17	8.32	23.49	3.83	27.61	136.99	4.69	2.25	12.67	2.58	7.95	0.45	7.6	6.71	4.42	4.34	5.46	10.57	6.96	10.56	9.35	3.67	43.45	11.56	42	7.39	6.59	4.2	13.93	4.22	3.4	5.45	10.45	164.45	11.23	24.7	3.17	1.54	17.05	26.15	10.41	1.25	20.51	7.69	6.14	5.76	19.08	16.36	23.07
hsa-miR-377-5p	1.81	0.66	4.24	0.37	2.44	11.63	0.24	0.05	1	0.09	0.59	0.001	0.74	1.51	1	0.97	0.56	0.68	0.49	0.53	3.17	0.13	0.66	0.38	0.87	0.31	0.49	0.24	0.61	0.62	1.15	0.52	1.18	12.11	0.57	5.68	0.91	0.4	0.86	2.22	2.06	0.09	0.06	0.05	1.31	0.79	2.02	1.59	0.98
hsa-miR-378a-3p	1469.2	239.61	1961.03	289.13	1143.11	235.55	739.3	354.5	731.55	344.57	2374.96	1730.45	925.76	328.47	1577.55	1102.48	921.27	197.5	1455.42	551.14	2011.09	1057.29	453.58	130.56	703.86	1109.02	2018.11	783.47	684.24	217.2	1249.9	581.94	1795.42	372.7	1259.03	401.58	3164.43	1338.84	897.75	429.22	1410.12	1530.29	2122.71	426.95	1571.73	223.58	413.02	256.25	2394.71
hsa-miR-378a-5p	144.63	34.95	202.65	33.03	117.73	39.64	84.69	51.04	86.08	33.95	219.72	175.01	68.68	24.86	122.56	84.46	87.99	33.7	127.64	47.2	136.45	146.24	60.27	12.64	49.96	55.02	160.97	81.83	56.33	20.03	34.27	52.64	131.9	33.16	135.69	30.43	138.92	59.68	111.21	51.32	75.68	121.7	210.07	46.24	97.01	19.89	46.3	22.06	159.88
hsa-miR-378b	0.74	974.57	0.26	0.5	4.12	0.14	0.24	0.49	0.35	2168.18	6.28	1810.56	0.3	347.71	731.32	79.66	5.36	0.18	1230.68	0.27	1202.07	0.45	979.38	0.23	0.001	5878.85	2072.61	0.62	3.59	1.75	5155.89	4862.14	6.39	0.05	0.57	1.12	6.48	0.31	1.44	0.28	7.95	2.45	0.18	2581.54	5658.03	1137.25	0.15	0.23	0.29
hsa-miR-378c	7.39	1.66	14.64	2.1	4.6	1.17	8.35	2.97	7.37	1.57	9.57	10.64	4.27	1.7	7.17	7.3	4.15	2.26	7.58	3.24	6.96	6.57	4.97	0.7	2.62	5.8	8.64	5.01	4.06	1.28	5.51	3.99	6.47	1.94	9.8	3.07	10.74	9.42	9.68	1.71	6.67	7.76	14.83	2.12	7.45	1.53	2.81	1.36	13.18
hsa-miR-378d	11.48	1.51	12.26	1.28	3.64	339.85	7.09	552.27	7.54	0.46	6.13	9.74	2.68	2.13	5.51	6.14	2.47	0.32	3.55	3.73	4.7	12.34	3.99	0.33	1.1	2.61	5.81	2926.43	643.59	0.81	3.88	7.7	4.29	0.43	4840.9	1.95	14646.7	5.37	11.98	464.95	4.29	5.77	10.72	0.69	8.76	0.6	1.73	1.36	1185.75
hsa-miR-378e	8.6	1.99	8184.09	1396.59	4389.89	29.46	880.43	8.3	3251.92	54.95	24.82	7302.58	141.43	3.5	4871.03	1172.45	3450.79	2.39	12.32	7.54	16.87	6616.01	16.16	747.58	4.88	33.69	30.5	5.3	8.97	47.93	7.19	9.35	145.81	3.08	197.98	2137.85	40.22	21.52	20.33	7.08	1148.19	1891.15	7176.95	8.7	1045.05	309.67	11.98	4.77	7727.76
hsa-miR-378f	1196.01	0.19	2086.65	371.02	129.62	0.33	3458.3	73.12	1169.03	420.84	2234.26	1.62	3347.19	0.14	0.62	0.74	2.01	6.82	143.73	3842.64	3.26	1.57	0.16	0.05	4.23	1275.77	3.12	4.49	84.47	0.43	5.13	0.66	0.66	17.08	1219.78	0.74	5.34	0.53	3.46	1957.26	209.77	0.92	1972.05	659.84	1.13	0.09	2681.34	1497.42	4.11
hsa-miR-378g	4871.56	271.87	331.43	66.7	1166.69	1427.38	3.85	8.68	4.77	6.4	211.58	21.46	861.6	1524.06	8.74	4525.53	837.52	187.47	6126.79	7.63	14.83	1382.11	4.09	159.03	493.1	16.56	7928.61	8.83	4.2	367.81	848.82	1017.17	7114.63	262.52	12.89	81.32	2141.66	5611.61	193.74	54.75	8.04	7826.54	7.27	2.86	133.09	5.72	2.32	3.93	7.15
hsa-miR-378h	3.67	1.14	25.3	0.87	3.69	2.24	11.84	3.24	11.96	0.83	4.07	10.05	3.77	2.13	2.9	3.6	1.49	1.04	3.06	2.62	6.35	6.93	6.5	0.05	1.52	6.46	5.66	2.34	1.94	1.75	3.6	5.64	4.99	1.7	11.57	0.33	7.79	4.97	8.47	0.79	3.52	8.77	20.27	1.17	4.83	1.44	1.33	1.96	6.76
hsa-miR-378i	149.51	0.99	2.48	0.64	3.79	0.84	1.02	2142.77	274.04	0.51	10034.2	1.62	2.83	1.56	157.37	5.59	3.36	1050.43	3.28	0.62	7602.59	31.8	2365.89	18.18	3066.88	9.3	2.93	589.66	3047.17	1410.02	3.21	95.66	2.67	1298.82	2.01	481.42	252.97	730.25	3206.07	1.11	5759.05	2.59	7.97	5.57	4.2	0.6	1.18	363.85	227.77
hsa-miR-378j	1.58	0.24	2.48	0.46	1.29	0.51	0.6	0.71	1.06	0.6	2.4	3.83	0.74	0.28	1.19	1.94	1.35	0.63	2.13	1.77	1.91	1.39	0.71	0.33	0.83	1.33	2.44	1.29	0.61	0.38	1.25	1.13	1.05	0.38	1.32	0.93	3.44	2.2	1.04	0.37	1.46	3.32	2.34	0.69	1.54	0.05	0.44	0.28	2.4
hsa-miR-379-3p	0.7	0.8	1.45	0.46	8.15	58.69	0.78	0.6	1.77	0.55	1.28	0.14	1.39	2.03	0.62	0.79	0.47	1.08	0.8	1.24	2.74	0.18	0.98	0.66	1.38	0.35	1.22	0.43	1.46	0.43	0.67	0.8	0.74	19.78	1.15	1.72	1	1.72	1.32	3.56	2.33	0.14	1.17	0.32	1.49	1.39	1.68	1.45	0.78
hsa-miR-379-5p	78.57	50.37	124.74	53.47	289.43	2290.57	61.91	35.54	93.98	24.92	112.44	10.55	84.92	154.88	57.69	66.5	48.03	90.44	50.48	87.44	229.9	30.1	89.96	39.51	130.94	30.9	68.55	14.41	89.66	37.56	98.8	50.39	85.85	835.66	84.81	293.84	92.18	81.52	44	140.54	138.61	22.44	58.83	65.22	97.96	68.93	155.26	85.73	88.07
hsa-miR-381-3p	13.71	13.62	32.49	8.21	45.15	374.63	15.81	5.22	13.96	1.8	14.91	1.26	6.26	13.66	8.55	9.56	5.83	14.23	13.87	20.14	32.79	4.74	17.85	4.93	17.62	3.14	8.59	3.34	19.5	8.62	14.86	7.23	11.11	137.72	13.75	33.64	11.37	6.95	15.95	58.36	20.05	5.91	12.48	13.2	20.1	14.55	23.52	24.49	19.3
hsa-miR-381-5p	1.07	1.56	3.41	1.19	1.97	15.69	2.16	0.66	2.06	0.32	0.78	0.14	0.45	1.28	0.95	0.74	0.28	1.76	1.15	1.77	2.48	0.54	1.47	0.001	0.74	0.18	0.98	0.33	1.51	0.62	0.96	0.52	1.14	9.93	2.01	2.51	0.82	1.32	1.84	4.77	1.37	0.51	2.11	1.17	1.35	2.09	2.51	2.76	1.22
hsa-miR-382-3p	4.97	8.18	11.49	3.38	30.92	299.6	3.01	1.21	2.71	0.51	7.85	1.44	2.48	6.71	1.76	7.57	3.31	10.89	5.89	10.29	18.09	3.13	5.51	2.58	6.12	2.08	4.68	2.62	7.93	1.71	2.78	8.03	7.78	212.75	7.28	13.82	4.57	3.96	6.97	11.25	4.29	1.48	6.97	5.3	3.61	6.37	8.83	13.42	4.31
hsa-miR-382-5p	18.12	10.88	22.97	11.36	77.27	471	11.54	6.7	21.8	5.02	6.48	1.17	7.15	30.63	3.94	7.43	3.78	14.64	2.84	8.21	9.48	3.89	11.96	5.45	9.8	3.32	5.17	3.2	5.9	2.56	4.89	8.73	7.43	217.05	7.68	38.71	4.76	11.8	12.38	18.09	10	1.66	8.97	11.77	3.7	11.39	21.35	21.74	7.15
hsa-miR-383-3p	0.37	0.33	0.41	0.27	0.38	0.001	0.42	0.11	0.65	0.001	0.39	0.001	0.1	0.001	0.9	0.28	0.19	0.18	0.31	0.58	1.35	0.001	0.38	0.001	0.23	0.09	0.15	0.001	0.19	0.001	0.38	0.001	1.18	0.52	0.17	0.09	0.23	0.4	0.4	0.001	0.46	0.001	0.29	0.05	1.22	0.05	0.44	0.001	0.73
hsa-miR-383-5p	20.16	9.98	10.71	1.32	13.66	2.52	7.87	0.93	16.85	0.23	7.11	0.72	2.93	0.99	8.21	14.73	12.64	4.61	7.05	34.65	39.09	0.22	7.21	0.05	6.95	5.71	3.9	2.72	12.04	0.43	9.25	0.99	30.09	12.44	5.21	4.7	9.56	2.38	4.2	0.19	12.56	0.97	9.84	1.96	39.83	4	19.38	2.2	13.32
hsa-miR-3909	1.9	7.66	4.09	7.03	4.51	10.32	2.16	6.21	1.36	11.01	7.06	25.56	2.48	7.61	1.52	4.48	1.77	6.73	5.05	19.61	5.13	9.12	3.11	2.82	2.58	7.04	3.17	1.77	5.48	2.27	1.68	14.04	3.45	8.85	5.5	1.72	5.3	31.73	2.3	10.37	3.75	8.68	7.38	27.04	2.8	3.9	0.89	4.39	2.06
hsa-miR-3912-3p	1.39	3.12	1.03	4.06	2.54	1.63	1.56	1.76	3.18	1.06	1.77	1.89	2.33	2.03	2.18	1.89	1.63	2.98	1.73	2.13	2.87	3.62	1.91	2.3	1.89	3.76	1.95	1.91	1.75	1.61	0.81	1.83	2.67	1.99	1.83	1.95	2.67	1.36	2.02	1.25	3.65	2.63	1.52	1.17	3.3	1.95	2.56	2.29	3.09
hsa-miR-3928-3p	0.46	0.57	0.47	1.19	0.24	0.19	0.12	0.11	0.35	0.69	0.15	0.32	0.45	0.24	0.28	0.69	0.19	0.54	0.31	0.35	0.09	0.27	0.33	0.7	0.28	0.53	0.29	0.24	0.33	0.47	0.05	0.75	0.13	0.19	0.4	0.28	0.05	0.22	0.06	0.23	0.23	0.09	0.18	0.32	0.18	0.37	0.1	0.28	0.44
hsa-miR-3939	0.05	1.66	0.16	0.001	0.14	2.43	0.001	0.05	0.06	0.32	0.05	0.18	0.2	0.24	0.001	0.05	0.19	0.5	0.13	0.44	0.48	1.79	0.05	0.001	0.14	0.93	0.2	0.19	0.19	0.09	0.05	0.23	0.22	1.85	0.29	0.28	0.32	0.53	0.17	0.42	0.05	1.06	0.41	0.27	0.001	0.46	0.25	0.61	0.001
hsa-miR-3940-3p	0.37	0.28	0.47	0.23	0.24	1.26	0.36	0.16	0.24	0.6	0.29	0.99	0.3	0.66	0.33	1.2	0.61	0.41	0.18	0.58	0.43	0.89	0.27	1.69	0.51	1.02	0.63	0.19	0.28	0.71	0.001	0.14	0.52	0.33	0.63	0.28	0.14	0.31	0.75	0.23	0.05	0.23	1.58	1.11	0.18	0.7	0.1	1.12	0.29
hsa-miR-3944-3p	0.74	6.67	1.4	0.96	0.96	0.56	1.26	0.49	0.59	1.57	0.74	1.04	0.65	0.24	0.9	1.25	0.47	0.99	1.77	2.62	0.43	1.12	0.33	0.28	0.37	1.99	0.39	0.52	0.42	0.24	0.24	0.89	0.31	0.57	0.92	0.19	1.31	0.26	0.29	1.11	0.23	1.52	1.58	1.22	0.63	0.46	0.94	0.37	0.2
hsa-miR-3944-5p	5.2	16.98	5.12	8.76	3.45	1.73	3.79	0.66	0.77	2.81	6.48	10.86	2.68	1.56	3.13	5.03	3.26	3.57	5.94	6.26	5.7	3.98	1.69	0.47	1.84	3.5	5.66	2.1	2.79	0.66	0.48	1.41	3.67	4.4	4.87	0.37	3.71	2.99	0.75	1.8	1.83	7.8	5.39	1.38	2.12	1.53	1.87	1.03	3.09
hsa-miR-3960	5.25	6.48	10.66	116.39	3.36	2.47	2.04	2.91	2.83	3.36	6.87	2.03	3.28	4.06	4.51	4.02	3.82	2.76	3.59	4.57	3.65	3.18	5.79	9.82	6.58	2.48	4.24	0.86	6.66	9.66	4.36	0.99	4.85	2.13	5.67	2.28	2.76	3.52	1.5	7.13	2.97	1.15	6.33	4.77	4.11	3.81	3.45	3.93	15.72
hsa-miR-409-3p	53.85	49.71	127.79	19.89	203.48	1885.31	53.07	26.75	58.68	9.63	40.86	7.53	26.87	101.71	23.55	41.98	20.1	39.66	25.17	55.01	80.36	14.49	36.63	12.31	35.38	11.47	37.62	12.02	30.03	13.5	13.61	29.68	37.79	806.05	49.45	224.24	13.91	9.33	43.66	100.42	27.59	11.03	42.42	42.63	18.61	53.97	72.92	65.11	15.38
hsa-miR-409-5p	1.72	0.85	1.66	0.18	6.18	48.98	0.6	0.16	0.59	0.18	0.64	0.09	0.15	1.18	0.28	0.88	0.37	1.4	0.4	0.84	1.17	0.22	0.93	0.23	0.74	0.31	0.24	0.33	0.38	0.24	0.34	0.7	0.35	17.55	0.69	2.23	0.32	0.75	0.69	1.34	0.37	0.46	0.94	0.42	0.27	1.26	1.04	0.79	0.34
hsa-miR-410-3p	10.55	16.03	17.33	16.65	132.54	1353.01	8.72	5.82	16.03	5.39	8.49	1.53	6.6	22.92	5.7	7.39	3.17	33.47	5.01	15.62	19.05	7.51	11.08	3.24	8.01	2.88	4.83	4.87	7.7	5.68	8.53	15.78	5.47	313.66	8.02	47.69	7.07	29.27	10.37	45.77	14.98	4.85	5.86	10.6	10.12	17.71	28.69	39.4	7.59
hsa-miR-411-3p	1.21	1.51	2.38	1.41	8.1	72.65	1.14	0.77	1.12	0.37	1.86	0.14	1.09	1.18	1.14	1.52	0.61	2.3	1.29	2	4.3	0.4	0.98	0.75	1.06	0.13	1.32	0.38	1.79	0.38	0.34	0.66	0.83	17.79	1.66	2.42	1.4	2.33	1.27	6.11	1.51	0.23	0.59	1.06	1.85	1.44	2.71	1.5	1.32
hsa-miR-411-5p	149.47	141.75	263.81	84.63	745.1	6155.27	160.9	65.48	376.91	63.61	282.12	24.3	242.29	328.71	174.6	150.73	93.96	175.18	163.62	243.65	572.03	71.02	213.33	73.06	255.85	67.06	136.57	39.27	312.38	79	127.8	61.61	121.14	1155.61	148.3	619.22	192.87	111.09	146.06	211.95	426.94	63.07	147.49	205.15	272.82	193.97	386.99	253.16	220.03
hsa-miR-412-5p	0.84	1.04	0.93	0.05	21.04	219.49	0.36	0.27	1.24	0.37	0.78	0.18	0.5	2.03	0.28	1.85	0.23	0.72	0.58	1.38	0.87	0.58	0.22	0.33	0.87	0.71	0.1	0.57	0.38	0.14	0.1	1.5	0.66	65.05	0.63	3.35	0.32	0.26	0.58	2.82	0.69	0.32	0.7	1.75	0.23	1.63	0.79	1.59	0.44
hsa-miR-421	13.01	86.74	17.69	9.76	16.97	49.3	6.55	21.42	19.44	99.49	14.18	49.09	11.47	49.29	7.08	17.36	12.73	40.66	19.5	46.58	16.44	53.71	17.14	15.22	10.26	69.59	14.98	51.2	18.7	10.14	5.37	24.75	12.55	46.74	16.9	20.7	15.63	31.51	12.15	84.32	19	14.54	19.04	79.06	11.02	70.47	10.65	64.23	6.07
hsa-miR-423-3p	1258.87	2705.8	2265.04	1497.28	1788.51	2948.33	1532.21	2414.32	1155.84	4254.79	2059.57	2110.99	1687.65	3108.53	827.24	2464.08	1281.43	2911.06	1733.92	2830.11	1388.92	2461.22	1300.15	1685.71	1224.48	5200.2	1660.51	2298.79	1822.79	1651.56	349.99	1803.72	1639.29	1781.51	1768.84	1368.51	801.96	1598.62	666.23	2682.29	707.69	2006.47	2120.54	3276.43	1084.38	1800.32	1437.9	1997.34	1336.57
hsa-miR-423-5p	11.62	371.71	363.24	79.25	4.17	1.07	12.68	1.59	2	227.53	368.71	346.69	74.59	22.87	124.7	3.74	2.52	53.71	331.33	396.75	368.83	383.41	161.91	4.18	209.56	89.99	45.96	211.09	5.15	404.9	38.35	11.04	37.79	41.87	512.1	39.78	125.92	83.36	102.17	108.15	21.37	216.53	445.05	14.85	23.53	140.52	124.44	155.23	194.56
hsa-miR-424-3p	74.76	78.47	118.01	36.77	217.43	113.78	59.38	44.17	83.25	33.02	197.55	72.31	170.73	134.13	73.27	214.09	126.69	65.55	186.63	286.73	568.42	66.19	109.07	23.82	292.93	136.21	158.48	33.69	326.54	20.22	93.43	80.73	274.26	168.7	229.38	206.93	149.16	54.27	118.06	30.77	121.85	58.13	242.07	121.74	382.57	89.71	169.95	109.61	166.5
hsa-miR-424-5p	431.67	413.05	579.35	281.46	978.79	490.33	369.77	163.6	1508.3	162.73	652.74	177.58	802.85	740.69	329.74	623.74	454.45	337.72	712.6	999.36	1434.27	352.68	698.25	99.84	970.01	584.01	472.36	206.51	1219.57	111.21	477.93	345.21	1045.03	689.48	782.45	702.54	651.21	144.63	1631.72	142.86	1019.9	163.11	1098.77	366.66	1419.67	535.53	837.08	519.37	726.23
hsa-miR-425-3p	39.49	37.32	46.56	20.58	24.35	75.36	23.74	48.67	16.85	78.21	20.06	28.18	12.46	40.55	20.7	14.08	14.32	46.44	20.7	47.51	18.22	84.75	19.65	30.16	17.25	19.7	17.47	53.54	21.29	32.73	12.66	15.31	20.82	37	23.55	56.62	18.93	36.14	24.36	50.21	28.18	19.3	28.71	54.93	19.6	22.22	15.88	36.93	29.29
hsa-miR-425-5p	286.29	1228.03	585.09	497.41	418.9	1186.33	336.65	482.39	378.62	1186.29	430.27	1366.05	260.32	513.64	292.32	440.69	235.25	1039.5	557.53	676.12	340.83	2531.13	537.48	1469.64	453.26	1322.52	352.38	1076.92	474.89	712.89	233.74	686.29	313.84	995.76	397.96	479.23	495.03	493.1	313.71	2030.8	476.59	574.52	494.27	1801.5	341.92	3362.51	318.36	1113.57	384.91
hsa-miR-4284	3.11	4.26	0.93	0.23	1.29	6.82	0.9	0.16	4.24	7.05	0.98	1.08	1.29	1.23	0.9	0.97	2.8	3.16	1.73	0.84	0.17	1.34	5.46	10.57	3.63	5.44	4.68	2.58	0.28	2.94	0.29	0.19	0.44	1.61	1.2	1.26	0.41	0.18	7.14	6.02	0.55	3.83	2.75	0.37	0.41	0.33	2.07	0.98	3.04
hsa-miR-4286	5.02	1.89	6.73	1.37	2.01	2.43	2.1	2.91	1.41	2.26	3.24	4.73	2.09	1.09	4.08	0.88	1.4	2.62	3.9	1.15	1.17	2.15	4.53	10.1	2.48	0.49	3.66	2.48	3.97	7.77	0.81	0.38	2.67	1.09	6.65	5.3	7.34	1.72	1.56	3.66	6.21	0.74	2.93	6.95	0.63	0.42	1.68	1.54	7.94
hsa-miR-429	302.93	126.38	109.37	27.97	301.37	183.21	104.76	458.88	246.52	140.66	241.16	238.94	390.38	3375.98	140.22	41.42	270.69	107.97	383.05	91.57	299.3	155.77	395.83	447.46	287.27	58.79	485.93	245.87	894.21	934.36	118.45	235.51	671.32	1687.7	328.34	525.89	242.06	127.29	253.93	38.46	953.9	20.04	211.01	1507.48	570.44	185.56	231.38	313.23	235.86
hsa-miR-431-5p	5.3	10.83	15.42	6.11	181.58	1773.35	5.53	2.8	7.72	2.44	5.4	1.31	2.83	9.5	1.76	6.37	1.82	7.59	1.77	6.52	10.31	6.04	5.9	1.74	2.81	1.99	1.9	3.96	4.39	1.99	2.01	11.08	2.58	242.74	4.7	14.19	2.9	3.13	2.94	15.5	4.11	2.4	5.04	12.35	1.85	9.2	15.09	11.5	1.91
hsa-miR-432-3p	0.23	0.24	0.21	0.05	1.15	11.16	0.06	0.22	0.29	0.001	0.1	0.05	0.001	0.43	0.05	0.09	0.09	0.18	0.09	0.18	0.22	0.001	0.33	0.05	0.14	0.04	0.05	0.05	0.001	0.09	0.29	0.23	0.04	4.87	0.001	1.16	0.001	0.001	0.23	0.001	0.23	0.05	0.12	0.21	0.14	0.09	0.2	0.28	0.15
hsa-miR-432-5p	17.24	13.76	26.7	6.39	92.42	838.63	4.81	3.02	5.83	2.67	9.42	1.62	5.21	23.73	5.7	11.27	6.71	8.49	5.76	15.04	26.35	6.26	8.84	4.32	16.56	3.9	8.93	6.44	13.98	8.57	9.64	25.31	11.76	891.02	14.73	88.07	8.47	1.36	12.04	39.61	9.87	2.26	7.91	17.45	7	14.27	20.95	11.97	5.63
hsa-miR-4326	0.37	3.5	0.21	0.68	0.72	3.55	0.12	0.55	0.29	0.97	0.2	0.23	0.4	0.8	0.14	0.65	0.23	2.57	0.53	1.06	0.26	2.68	1.2	3.1	0.37	1.73	0.05	0.33	0.42	0.99	0.19	2.63	0.22	1.18	0.17	1.44	0.14	0.66	0.63	2.36	0.23	0.32	0.41	1.64	0.05	0.14	0.05	0.79	0.39
hsa-miR-433-3p	6.5	6.48	8.8	18.75	43.91	425.25	4.09	1.76	4.07	1.66	4.42	1.44	3.03	7.47	3.18	6.6	1.49	20.06	2.26	10.56	12.74	2.59	7.26	2.3	6.9	2.08	3.22	1.29	6.23	1.56	4.07	4.13	3.06	100.39	7.51	14.75	3.53	20.03	2.82	5.51	4.2	3.05	8.15	7.16	4.56	4.88	9.61	7.67	4.11
hsa-miR-4417	0.56	1.18	0.26	0.27	0.67	1.21	0.06	0.22	0.24	0.55	0.05	0.5	0.35	0.09	0.14	0.23	0.51	0.36	0.18	0.18	0.04	0.04	0.27	1.88	0.32	0.49	0.15	0.14	0.09	1.18	1.63	0.05	0.13	0.09	0.29	0.47	0.23	0.001	0.06	3.01	0.05	0.18	0.23	0.85	0.18	0.28	0.3	0.93	0.1
hsa-miR-4422	0.51	0.76	0.36	0.23	0.34	0.23	0.18	0.49	1.36	0.37	0.25	0.14	0.55	0.9	0.09	0.14	0.33	0.45	0.27	0.58	0.13	0.31	0.38	0.19	1.01	1.68	0.63	0.29	0.47	0.57	0.38	0.05	0.74	0.24	0.29	0.47	0.54	0.22	0.63	0.23	0.55	0.18	0.41	0.11	0.41	0.33	0.49	0.37	0.24
hsa-miR-4440	0.28	1.89	0.26	0.55	0.62	3.08	0.06	0.22	0.06	1.15	0.2	0.001	0.3	1.13	0.001	0.001	0.05	0.81	0.18	0.71	0.17	0.85	0.11	0.47	0.37	1.51	0.29	0.57	0.09	0.001	0.1	0.85	0.22	0.66	0.06	0.88	0.36	1.01	0.001	0.001	0.14	0.32	0.64	0.27	0.09	0.56	0.1	1.08	0.59
hsa-miR-4443	2.42	0.95	3.05	1.19	0.81	0.84	0.42	0.49	1.36	0.28	2.11	1.22	0.25	0.33	2.18	3.69	2.61	2.89	1.73	1.02	3	0.81	3.49	3.95	1.43	0.53	4.73	2.05	1.56	3.17	0.1	0.05	0.83	0.43	3.5	2.93	0.27	1.14	2.13	1.53	1.78	1.48	4.57	0.53	1.54	1.26	1.53	0.7	1.42
hsa-miR-4446-3p	0.33	0.14	0.26	0.09	0.29	0.05	0.001	0.82	0.35	0.41	0.29	0.09	0.6	0.14	0.05	1.29	0.37	0.14	0.13	0.49	0.48	0.09	0.11	1.17	0.55	2.3	0.54	0.05	0.33	0.05	0.1	0.38	0.31	0.05	0.17	0.56	0.18	0.22	0.06	0.28	0.23	0.05	0.35	0.11	0.23	1.02	0.35	0.7	0.59
hsa-miR-4454	1.67	1.18	2.48	0.96	0.62	1.73	0.78	0.44	1.71	1.7	2.21	0.59	0.74	0.47	0.47	0.69	0.79	0.5	0.31	0.22	0.74	0.18	0.38	0.33	0.46	0.04	0.93	0.14	0.42	0.001	0.24	1.27	0.79	0.71	1.09	0.56	0.68	0.44	1.15	0.37	0.37	0.28	1.05	1.38	0.41	0.28	1.87	0.47	0.93
hsa-miR-4461	0.46	0.71	0.36	1.05	1.25	3.41	0.96	0.05	0.12	0.14	0.1	0.5	0.2	0.28	0.28	0.23	0.33	0.27	0.22	0.22	0.13	0.63	0.11	0.28	0.09	0.66	0.24	0.72	0.28	0.62	0.77	0.99	0.26	0.19	0.34	0.09	0.27	0.4	0.12	0.32	0.14	0.88	0.23	0.001	0.09	0.23	0.64	0.79	0.1
hsa-miR-4466	1.16	2.89	1.03	0.64	1.05	1.26	0.72	0.66	4.6	4.38	0.78	1.04	0.7	0.99	0.43	0.83	0.84	0.41	1.68	6.03	0.22	1.52	3.88	1.93	0.74	1.73	1.51	0.19	1.23	0.71	0.1	1.74	0.44	0.66	1.83	0.47	0.36	0.09	0.35	1.16	0.87	0.83	2.4	2.39	0.14	2.32	1.63	5.8	0.34
hsa-miR-4470	0.05	0.47	0.21	0.32	0.14	0.56	0.24	0.44	0.18	1.75	0.05	0.59	0.1	0.14	0.001	0.09	0.001	0.32	0.13	0.22	0.001	0.72	0.11	0.14	0.05	0.22	0.1	0.43	0.05	0.19	0.001	0.23	0.13	0.47	0.17	0.14	0.05	0.04	0.12	0.14	0.09	0.05	0.12	1.75	0.09	0.42	0.25	2.15	0.001
hsa-miR-4473	0.05	0.24	0.1	0.09	0.24	0.84	0.001	0.33	0.53	0.32	0.25	0.001	0.15	1.47	0.09	0.14	0.14	0.32	0.49	0.44	0.26	0.09	0.76	0.52	0.18	0.89	0.1	0.001	0.61	0.24	0.38	0.38	0.57	0.09	0.34	0.23	0.18	0.09	0.06	0.09	0.23	0.09	0.18	0.42	0.36	2.32	0.35	0.42	0.15
hsa-miR-4479	0.51	1.23	0.47	0.73	0.43	2.52	0.54	0.99	0.47	2.49	0.59	1.26	0.35	0.9	0.19	0.51	0.47	0.68	0.4	0.35	0.74	2.37	0.6	0.7	0.74	2.17	0.29	1	0.85	0.76	0.05	1.03	0.35	1.04	0.29	0.28	0.27	0.22	0.001	0.32	0.46	0.32	0.41	1.7	0.41	2	0.49	3.32	0.34
hsa-miR-4484	6.92	3.88	11.02	1.23	10.35	1.63	3.61	0.71	7.48	1.66	10.15	4.78	4.82	0.28	6.46	5.17	8.49	1.26	5.41	7.59	4.74	0.31	3.88	1.6	2.3	0.18	7.07	1.91	6.8	0.71	1.77	0.56	6.82	1.14	6.13	2.05	3.17	1.06	10.89	0.65	5.07	11.59	4.22	0.64	2.26	1.63	7.54	1.08	4.31
hsa-miR-4485-3p	2.14	0.38	0.1	0.27	2.11	17.7	1.68	0.11	0.12	0.23	0.83	0.5	0.05	0.19	0.47	0.6	0.75	0.36	1.73	1.02	0.52	0.36	0.22	0.14	3.17	1.06	0.44	0.81	0.28	1.8	0.53	0.19	0.31	0.47	0.23	0.33	2.31	0.09	0.23	0.65	0.37	3.32	0.41	0.21	0.18	0.37	5.52	0.33	0.1
hsa-miR-4488	33.78	37.32	19.87	66.07	28.86	83.9	34.62	22.03	29.22	55.59	18.1	7.62	24.98	83.51	18.8	16.72	54.23	46.85	13.61	14.91	20.96	23.26	44.38	49.75	57.32	18.24	27.37	10.16	29.04	139.58	86.67	27.43	29.21	13.2	16.45	24.94	7.56	2.64	11.58	95.33	7.81	19.62	22.5	32.4	23.85	64.61	60.59	30.43	23.71
hsa-miR-4492	8.32	1.47	7.35	3.01	2.21	8.73	1.62	0.38	0.47	5.3	1.67	0.05	1.14	0.95	3.18	0.32	2.1	0.41	2.13	0.4	0.22	0.4	1.31	2.49	3.82	1.9	2.44	0.1	2.12	7.44	1.44	0.52	0.74	0.85	0.57	1.58	1.49	0.13	0.35	1.34	1.1	0.42	1.64	2.6	0.9	1.12	3.65	0.33	2.74
hsa-miR-449a	4.04	3.55	2.85	28.33	2.83	20.59	1.98	38.18	7.19	21.83	1.47	2.52	2.43	13.99	0.76	20.92	4.15	124.54	2.88	22.58	5.83	377.24	9.55	15.08	3.5	61.44	3.42	3.1	6.09	174.96	1.2	17.7	4.29	9.84	3.67	13.21	2.94	34.51	1.84	8.38	7.67	1.29	4.04	9.44	3.52	48.3	4.73	17.67	3.04
hsa-miR-4507	0.56	0.19	0.1	0.32	0.14	0.14	0.12	0.11	0.18	0.14	0.1	0.05	0.25	0.09	0.19	0.14	0.28	0.14	0.18	0.09	0.22	0.13	0.38	0.56	0.51	0.13	0.39	0.1	0.42	0.19	0.14	0.28	0.17	0.14	0.06	0.33	0.23	0.04	0.001	0.19	0.18	0.09	0.23	0.16	0.14	0.05	0.39	0.23	0.2
hsa-miR-450a-1-3p	1.49	1.09	1.35	0.91	2.92	1.17	1.02	0.27	3.65	0.41	2.4	0.32	1.39	1.51	0.66	0.79	0.89	0.5	0.53	0.8	3.78	0.31	1.15	0.19	1.29	0.31	1.22	0.29	1.89	0.38	0.58	1.83	1.09	0.8	0.8	3.16	1.4	0.31	2.48	0.19	1.74	0.18	1.88	0.48	2.89	1.07	1.92	1.26	2.69
hsa-miR-450a-2-3p	0.05	0.28	0.31	0.09	0.43	0.14	0.06	0.001	0.12	0.05	0.39	0.001	0.1	0.09	0.09	0.05	0.05	0.23	0.13	0.04	0.35	0.04	0.11	0.001	0.18	0.09	0.15	0.1	0.47	0.001	0.1	0.05	0.26	0.05	0.63	0.42	0.23	0.04	0.35	0.05	0.14	0.05	0.35	0.27	0.68	0.37	0.54	0.28	0.2
hsa-miR-450a-5p	44.74	31.45	39.89	15.92	50.91	29.27	30.95	11.43	100.69	11.88	31.4	6.45	39.53	52.65	25.31	27.48	28.72	29	12.85	19.03	70.27	16.64	26.58	4.89	28.11	18.55	27.23	13.88	35.88	12.03	20.85	38.13	46.45	36.05	39.31	86.86	26.32	7.13	129.53	6.2	42.38	8.03	33.64	24.18	48.91	24.26	31.85	31.69	41.69
hsa-miR-450b-5p	1.86	1.56	2.02	0.68	3.74	1.73	0.96	0.38	3.89	0.23	3.58	0.27	1.59	2.08	1	1.48	2.1	1.04	0.84	1.24	4.61	1.34	1.42	0.14	1.56	0.84	1.56	0.48	1.84	0.43	0.72	1.22	2.27	1.66	2.46	2.93	2.63	0.35	5.47	0.32	1.74	0.42	3.11	0.95	2.53	1.67	3.45	2.06	2.74
hsa-miR-4516	11.94	5.25	3.1	2.92	2.16	2.85	2.58	0.38	3	2.26	1.82	0.45	1.14	1.23	2.23	1.52	3.03	1.31	1.68	1.42	3.48	1.74	2.78	2.16	4.32	2.43	1.51	1.57	1.98	9.9	3.55	0.28	5.82	1.28	2.12	2.14	1.36	0.22	2.13	5.32	1.96	1.11	1.82	1.22	1.85	2.23	2.96	1.87	4.9
hsa-miR-451a	26592.6	15745.5	31251.9	17324.3	38140.9	26791.4	27330.4	3135.57	49845.8	11003	44801.8	6930.33	21833.2	17967	17148.7	16988.6	25068.7	6243.63	72860.7	70266.1	34802.1	9729.64	18127.6	47588.7	38930	6677.65	23061.6	6077.78	59809.2	42948.1	83263.9	2566.32	24843.7	10540.4	28006.5	7363.5	73589.9	5094.57	32040.7	19462.1	79373.2	50606.1	28163	8709.41	41855.9	12240.5	50473.3	31925.5	28348.8
hsa-miR-452-5p	2.69	11.59	3.31	1.05	1.25	2.8	4.03	5.82	1.59	16.44	0.74	18.03	2.04	4.4	0.47	13.72	2.89	16.13	3.24	11.09	1.96	54.16	2.78	20.11	4	6.68	2.68	0.67	2.74	21.08	0.43	3.99	1.44	6.81	4.53	4.51	1.27	0.62	5.3	4.58	3.84	6.33	4.22	15.54	1.45	8.74	0.99	16.55	1.27
hsa-miR-4521	2.79	0.8	3.05	0.82	1.1	1.4	0.78	1.1	2	1.15	0.69	0.32	1.24	1.47	0.76	1.52	0.98	0.54	2.79	2.31	0.48	1.39	0.76	3.24	6.12	0.53	0.68	0.33	1.23	2.04	0.62	1.13	1.31	0.76	1.2	1.49	1.95	1.67	1.38	0.42	2.33	0.42	3.4	0.42	3.7	0.93	1.87	0.7	2.25
hsa-miR-4524a-3p	6.13	3.74	7.86	2.1	4.7	0.61	3.13	0.6	1.59	4.1	4.12	16.95	3.38	1.94	5.84	25.31	2.47	5.38	6.2	9.89	7.52	3.89	2.95	0.42	3.08	0.93	5.51	10.69	4.34	1.14	4.84	1.31	5.25	2.79	5.96	1.54	5.84	8.85	12.67	1.53	5.62	6.65	11.43	0.58	6.59	0.05	2.32	1.26	10.87
hsa-miR-4532	13.71	7.99	50.75	8.9	29.19	24.89	11	4.72	8.31	9.12	20.41	11.81	9.49	18.34	16.76	8.91	9.23	24.76	35.81	36.16	11.44	3.09	14.19	10.43	39.24	6.33	10.1	2.19	38.15	27.09	15.77	9.25	26.46	22.09	13.12	19.07	36.92	3.83	4.78	20.18	14.34	4.8	8.44	4.51	58.53	15.8	19.13	7.95	64.56
hsa-miR-4536-5p	0.37	0.28	0.21	0.32	0.19	0.05	0.12	0.49	0.35	0.09	0.69	0.14	0.3	0.52	0.38	0.37	0.19	0.14	0.62	0.44	0.35	0.27	0.27	0.14	0.6	0.49	0.44	0.14	0.47	0.09	0.34	0.14	0.35	0.33	0.29	0.14	0.36	0.18	0.75	0.09	0.37	0.05	0.23	0.05	0.32	0.09	0.2	0.14	0.73
hsa-miR-454-3p	82.38	158.07	101.51	169.22	108.38	230.27	24.16	32.52	37.47	77.33	67.89	141.15	26.77	66.26	30.25	91.99	89.2	289.02	99.27	83.01	79.01	490.56	70.86	65.35	78.53	86.85	84.9	154.21	107.65	146.54	38.06	70.91	74	109.76	104.98	116.59	67.4	78.17	74.64	288.22	43.16	25.99	104.01	90.78	31.21	108.17	76.57	96.48	67.79
hsa-miR-454-5p	0.14	0.66	0.52	0.59	0.53	2.24	0.18	0.33	0.24	1.11	0.2	1.49	0.2	0.9	0.19	0.32	0.14	1.76	0.4	1.86	0.35	3.22	0.44	0.28	0.23	0.49	0.2	0.86	0.76	0.81	0.19	0.33	0.17	0.43	0.52	0.47	0.32	0.57	0.29	1.11	0.5	0.92	0.53	0.8	0.27	0.98	0.44	0.79	0.34
hsa-miR-455-3p	1096.72	587.2	1252.03	392.61	1135.29	989.34	922.5	379.22	608.41	502.55	1677.03	931.5	838.26	542.81	1431.15	913.52	791.26	1233.97	1687.26	992.7	2027.09	1356.66	489.88	1564.69	781.2	483.66	1391.08	1499.24	1307.53	414.8	496.15	395.83	1532.14	918.5	1723.75	338.08	1299.39	1020.88	948.55	1181.51	1094.44	1520.97	1673.38	550.66	1796.95	284.8	728.61	291.73	1074.41
hsa-miR-455-5p	255.72	169.7	278.5	173.47	248.93	434.16	197.57	88.89	200.92	112.89	363.26	435.59	164.08	125.91	254.43	222.08	156.02	427.03	200.54	159.31	371.35	338.37	142.97	254.88	155.41	107.13	206.1	448.61	317.9	82.36	178.85	121.39	359.89	268.81	321.35	92.21	308.55	317.04	308.24	514.61	274.72	526	407.96	266.29	404.38	134.1	142.73	116.91	333.82
hsa-miR-4632-3p	0.65	0.43	0.47	0.14	0.62	0.28	0.06	0.05	0.06	0.14	0.54	0.05	0.3	0.19	0.43	0.6	0.37	0.36	0.62	0.67	0.26	0.58	0.27	0.09	0.28	0.66	0.1	0.05	0.33	0.19	0.1	0.33	0.57	0.43	0.29	0.37	0.14	0.31	0.4	0.09	0.001	0.001	0.82	0.16	0.14	0.19	0.44	0.47	0.93
hsa-miR-4634	0.42	0.33	10.19	0.91	0.29	0.05	0.06	0.99	0.47	1.01	2.06	0.32	4.32	0.8	1.28	0.28	0.37	0.27	0.31	0.58	0.17	0.18	0.76	1.32	0.09	0.04	2	0.05	1.09	0.9	0.86	0.001	0.57	0.28	1.83	2.74	0.32	0.001	0.35	1.34	0.78	0.46	0.35	2.65	0.32	0.37	2.17	0.09	3.38
hsa-miR-4636	1.72	5.01	1.76	1.41	0.86	1.45	1.32	0.38	2.42	0.46	0.78	0.32	1.24	7.14	1.14	4.8	0.79	0.86	1.46	2.79	2.22	9.75	1.69	0.61	1.15	2.35	0.73	0.29	1.13	0.24	1.05	0.66	1.75	1.42	1.26	1.49	1.36	1.06	2.88	0.46	1.28	0.88	2.17	0.69	1.67	0.93	0.94	1.26	1.42
hsa-miR-4638-3p	0.09	0.28	0.31	0.001	0.05	0.42	0.18	0.33	0.12	0.46	0.1	0.09	0.25	0.24	0.001	0.28	0.05	0.18	0.001	0.49	0.09	0.27	0.16	0.38	0.09	0.18	0.1	0.1	0.14	0.09	0.1	0.09	0.09	0.19	0.06	0.09	0.09	0.13	0.001	0.09	0.14	0.09	0.12	0.37	0.14	0.46	0.49	0.42	0.39
hsa-miR-4645-3p	0.23	0.28	0.36	0.05	0.19	0.19	0.001	0.27	0.53	0.28	0.05	0.05	0.35	1.56	0.09	0.18	0.05	0.14	0.22	0.62	0.26	0.4	0.6	0.52	0.41	0.53	0.34	0.05	0.19	0.52	0.14	0.75	0.31	0.33	0.34	1.12	0.18	0.13	0.23	0.001	0.46	0.14	0.18	0.21	0.09	0.09	0.001	0.19	0.15
hsa-miR-4659a-3p	0.19	2.08	0.31	0.64	0.14	0.75	0.06	0.27	0.35	0.55	0.15	0.14	0.2	1.23	0.38	1.34	0.14	0.5	0.4	0.98	0.48	0.81	0.49	0.61	0.18	3.9	0.39	0.43	0.14	0.38	0.77	0.94	0.04	0.14	0.17	0.19	0.63	0.66	0.17	0.37	0.14	0.14	0.41	0.21	0.32	0.6	0.15	0.65	0.59
hsa-miR-4659b-5p	0.05	0.9	0.05	0.32	0.14	0.09	0.06	0.22	0.29	0.6	0.34	0.14	0.35	0.76	0.05	0.79	0.09	0.23	0.18	0.93	0.17	0.36	0.22	0.28	0.05	1.95	0.05	0.14	0.001	0.38	0.24	0.61	0.13	0.14	0.06	0.28	0.27	0.18	0.4	0.19	0.09	0.001	0.29	0.05	0.05	0.33	0.25	0.09	0.05
hsa-miR-4661-5p	0.05	2.84	0.16	0.05	0.24	0.61	0.12	0.38	0.12	3.5	0.05	2.34	0.001	0.14	0.09	0.74	0.05	0.05	0.18	0.18	0.3	0.94	0.22	0.19	0.14	1.59	0.15	0.95	0.05	0.09	0.1	0.28	0.35	0.33	0.06	0.001	0.86	2.51	0.06	0.23	0.18	0.23	0.47	2.28	0.23	0.28	0.25	1.08	0.001
hsa-miR-4662a-5p	9.29	11.4	13.19	3.7	7.48	10.27	8.17	3.85	5.72	5.71	14.13	73.76	7.5	7.7	14.63	8.91	7.13	13.91	12.81	10.16	18.44	19.72	8.13	1.41	3.63	8.01	9.08	28.63	10.39	7.63	12.42	5.4	19.24	17.74	8.54	1.44	15.81	4.27	16.36	4.49	10.32	35.09	9.2	2.55	23.3	5.86	7.84	10.28	16.95
hsa-miR-4664-3p	0.19	1.47	0.36	0.09	0.14	2.89	0.001	0.05	0.12	1.06	0.05	1.67	0.001	0.57	0.05	0.09	0.09	0.27	0.04	0.13	0.13	0.58	0.05	0.09	0.05	0.44	0.24	1.72	0.001	0.09	0.001	0.001	0.13	0.62	0.11	0.05	0.09	0.04	0.001	0.42	0.001	0.18	0.47	1.59	0.09	0.56	0.15	0.7	0.05
hsa-miR-4664-5p	0.79	7.24	1.66	3.47	1.53	6.26	0.12	0.22	0.24	2.12	0.39	2.98	0.1	0.61	0.19	0.65	0.23	1.63	0.58	0.98	0.22	2.06	0.55	2.11	0.41	1.51	0.54	4.96	0.24	0.9	0.14	0.66	0.22	3.69	1.26	0.7	0.54	0.4	1.09	1.39	0.55	0.69	2.05	5.46	0.14	1.35	0.05	3.32	0.69
hsa-miR-4670-3p	0.74	0.9	0.67	0.05	0.19	0.28	0.18	0.05	0.59	0.46	0.64	0.23	0.05	0.05	0.47	0.74	0.28	0.5	0.18	0.31	0.7	0.04	0.22	0.09	0.55	0.001	0.78	2.24	0.24	0.001	0.48	0.09	0.13	0.33	0.57	0.37	0.23	0.09	0.63	0.23	0.23	0.97	0.001	0.05	0.5	0.09	0.35	0.05	0.2
hsa-miR-4677-3p	0.14	0.61	0.26	0.59	0.001	0.09	0.12	0.22	0.12	0.6	0.001	0.14	0.2	0.14	0.19	0.37	0.09	0.45	0.22	0.49	0.04	0.67	0.11	0.28	0.14	0.31	0.001	0.52	0.19	0.05	0.05	0.05	0.001	0.28	0.06	0.23	0.05	0.001	0.4	0.28	0.09	0.09	0.18	0.001	0.14	0.42	0.1	0.14	0.2
hsa-miR-4677-5p	0.6	3.36	0.62	1.69	0.77	0.84	0.24	1.04	0.59	1.2	0.83	0.59	0.35	1.18	0.14	1.11	0.61	2.12	1.02	1.82	0.78	4.03	0.93	2.16	0.64	2.3	0.49	1.24	0.66	0.57	0.86	1.97	0.87	1.61	0.92	1.3	0.59	1.67	0.75	0.79	0.64	1.43	0.7	0.9	0.59	2.14	0.2	0.7	0.49
hsa-miR-4683	0.46	0.19	1.03	0.55	0.86	0.09	0.72	0.05	0.18	0.51	0.49	0.36	0.74	0.66	0.24	0.46	0.37	0.23	0.8	1.38	1	0.09	0.33	0.14	1.01	0.31	0.44	0.14	1.32	0.47	0.53	0.23	0.79	1.23	0.4	0.28	0.68	0.75	0.58	0.14	0.37	0.18	0.64	0.32	1.54	0.09	1.04	0.14	1.42
hsa-miR-4685-3p	0.23	2.13	0.1	0.46	0.48	1.21	0.18	0.11	0.35	0.97	0.59	2.57	0.79	0.76	0.28	1.85	0.65	2.21	0.35	0.84	1	1.03	0.22	0.75	0.18	1.37	0.29	1	0.19	0.14	0.19	0.56	1.18	2.55	1.09	0.33	0.41	1.06	0.23	1.11	0.14	2.26	1.41	1.38	0.45	0.84	0.54	1.4	0.44
hsa-miR-4686	6.78	0.38	9.57	0.001	2.01	0.09	4.39	0.11	6.3	0.001	8.49	0.05	1.34	0.09	5.22	0.09	4.52	0.001	10.37	0.09	6.52	0.001	2.02	0.001	0.41	0.001	9.37	0.001	4.96	0.05	1.2	0.001	6.82	0.47	15.18	0.28	7.61	0.001	8.29	0.09	5.71	0.18	12.6	0.001	1.81	0.05	3.35	0.05	2.2
hsa-miR-4695-3p	0.33	0.61	1.35	0.14	0.48	1.49	0.54	0.16	0.59	1.7	0.54	3.02	1.09	0.19	0.28	0.92	0.79	0.5	1.86	0.53	0.65	2.33	0.66	0.001	0.46	0.4	0.93	0.91	1.42	0.09	0.1	0.28	1.14	0.47	1.6	0.05	0.77	0.79	0.4	0.19	0.46	2.26	1.88	1.38	0.45	0.33	0.84	1.54	0.05
hsa-miR-4701-5p	0.09	0.38	0.05	0.18	0.1	0.33	0.24	0.05	0.24	0.28	0.001	0.18	0.15	0.05	0.001	0.09	0.14	0.27	0.09	0.18	0.001	0.18	0.22	0.94	0.18	0.22	0.1	0.14	0.05	0.001	0.14	0.05	0.22	0.24	0.06	0.001	0.09	0.18	0.001	0.14	0.14	0.001	0.12	0.11	0.09	0.09	0.05	0.19	0.15
hsa-miR-4705	0.23	0.14	4.35	0.37	0.34	0.05	0.6	0.05	0.41	1.38	0.59	0.001	0.4	0.47	0.38	0.28	0.33	0.09	0.49	0.67	0.43	0.72	0.71	7.05	1.15	0.31	0.34	0.001	1.51	0.05	0.67	0.05	0.52	0.28	0.74	0.37	0.27	0.18	1.38	0.05	0.64	0.09	0.53	0.05	2.48	0.09	1.87	0.19	0.83
hsa-miR-4724-5p	0.05	0.24	0.36	0.5	0.05	0.93	0.3	0.11	0.41	0.64	0.34	0.59	0.4	0.47	0.09	1.15	0.14	0.36	0.44	1.24	0.17	0.85	0.05	0.09	0.14	3.05	0.39	0.81	0.09	0.05	0.14	0.23	0.13	0.24	0.34	0.19	0.23	0.09	0.12	0.05	0.05	0.28	0.29	0.11	0.05	0.09	0.15	0.23	0.15
hsa-miR-4725-3p	0.42	1.89	0.36	0.59	0.77	1.82	0.9	2.09	0.18	3.32	0.59	0.18	0.74	2.13	0.05	0.42	0.47	0.54	0.66	0.98	0.48	1.43	0.55	0.61	0.32	1.64	0.78	0.43	0.47	0.33	0.14	2.11	0.48	2.6	0.74	0.51	0.45	1.98	0.29	3.38	0.64	0.97	0.7	12.57	0.27	2.14	0.2	3.27	0.1
hsa-miR-4728-3p	0.79	2.27	0.67	0.32	0.67	1.96	0.3	0.22	0.06	1.15	0.44	0.45	0.3	1.99	0.19	1.57	1.12	1.58	0.49	0.8	0.17	0.67	0.66	1.27	0.74	0.75	0.93	0.43	0.19	1.47	0.19	0.61	0.96	0.57	0.74	0.19	1.09	0.66	0.35	2.55	0.5	0.88	0.88	1.64	0.41	1.26	0.59	0.7	0.93
hsa-miR-4731-5p	0.33	0.33	0.31	0.37	0.38	0.28	0.12	0.88	0.06	0.09	0.05	0.05	0.25	0.85	0.09	0.51	0.28	0.36	0.58	0.49	0.78	0.27	0.22	0.61	0.87	0.58	0.24	0.05	0.61	0.47	0.14	1.17	0.48	0.19	0.11	0.33	0.32	0.18	0.06	0.14	0.27	0.001	0.18	0.37	0.45	0.42	0.25	0.33	0.34
hsa-miR-4732-3p	0.23	0.33	0.83	0.001	0.91	1.4	0.72	0.05	0.24	0.32	2.45	0.77	0.65	0.38	0.38	1.02	1.07	0.14	2.17	3.06	1.43	0.4	0.22	0.33	1.01	0.09	2.05	0.24	1.51	0.05	0.58	0.05	1.14	0.47	1.38	0.05	0.77	0.09	0.69	0.6	0.18	2.03	0.82	0.16	0.9	0.28	1.92	0.33	0.39
hsa-miR-4742-3p	0.14	0.57	0.05	0.09	0.19	1.07	0.06	0.33	0.001	0.74	0.25	0.54	0.4	0.43	0.09	0.37	0.42	0.5	0.18	0.58	0.39	1.52	0.22	0.14	0.05	0.62	0.1	0.19	0.14	0.19	0.001	0.23	0.13	1.56	0.29	0.23	0.27	0.35	0.4	0.28	0.05	0.51	0.41	1.17	0.09	1.12	0.25	1.36	0.15
hsa-miR-4749-3p	0.6	0.33	0.1	0.09	0.29	0.51	0.06	0.22	0.06	0.23	0.1	0.63	0.2	0.14	0.09	0.32	0.23	0.5	0.27	0.09	0.17	0.63	0.16	0.56	0.28	0.49	0.2	0.29	0.42	0.38	0.05	0.19	0.31	0.38	0.29	0.28	0.05	0.18	0.06	0.42	0.32	0.09	0.35	0.58	0.14	0.05	0.15	0.23	0.15
hsa-miR-4749-5p	0.05	0.33	0.001	0.09	0.05	0.09	0.06	0.27	0.001	0.55	0.15	0.18	0.1	0.14	0.09	0.05	0.05	0.18	0.27	0.09	0.17	0.18	0.001	0.09	0.09	0.27	0.1	0.1	0.14	0.05	0.001	0.09	0.17	0.24	0.06	0.05	0.001	0.18	0.001	0.19	0.05	0.001	0.23	0.21	0.09	0.14	0.05	0.09	0.05
hsa-miR-4772-3p	1.25	0.95	3.88	0.32	2.59	0.93	1.68	0.66	3.06	0.69	2.94	0.5	3.13	1.99	1.9	2.12	1.73	1.31	3.77	3.28	2.96	0.94	7.7	0.99	2.07	3.19	2.73	0.48	6.28	2.51	0.96	1.88	5.86	2.37	2.69	1.67	2.17	1.23	4.95	0.79	3.88	0.51	4.63	0.74	2.39	4.69	2.02	1.45	2.5
hsa-miR-4775	0.33	1.42	0.36	0.5	0.38	0.84	0.18	0.22	0.12	0.97	0.59	0.09	0.15	0.76	0.19	1.39	0.42	0.63	0.58	0.31	0.35	1.52	0.11	0.09	0.001	0.35	0.05	0.57	0.38	0.33	0.14	0.38	0.35	0.71	0.23	0.47	0.14	0.26	0.12	0.51	0.32	0.28	0.12	0.95	0.27	0.19	0.3	0.47	0.24
hsa-miR-4787-3p	1.58	0.95	0.83	0.73	0.91	1.12	0.24	0.77	0.18	0.55	0.59	0.81	0.3	1.04	0.62	0.65	0.37	1.9	0.84	1.42	0.3	2.59	1.09	0.61	1.1	3.14	0.59	0.43	1.27	3.65	0.14	0.28	1.14	1.04	0.74	1.26	0.23	0.13	0.29	1.06	0.27	0.55	0.47	0.42	0.41	0.51	1.28	1.92	2.25
hsa-miR-4791	0.56	2.08	0.21	0.55	1.15	0.47	0.84	0.71	0.77	1.38	1.03	1.58	0.79	0.99	0.52	0.79	0.61	0.59	0.49	0.67	1.17	0.49	0.49	0.42	0.64	3.72	0.63	4.15	1.18	0.9	0.38	1.17	0.83	0.8	0.4	0.37	0.95	0.44	0.29	2.55	0.87	0.37	0.76	3.18	0.99	0.51	0.69	2.29	1.13
hsa-miR-4795-5p	0.001	0.24	0.05	0.23	0.05	0.09	0.06	0.33	0.12	0.6	0.001	0.23	0.05	0.19	0.05	0.05	0.05	0.41	0.04	0.13	0.04	0.04	0.05	0.33	0.001	0.27	0.15	0.001	0.001	0.24	0.1	0.05	0.04	0.14	0.06	0.001	0.05	0.35	0.17	0.001	0.05	0.23	0.06	0.05	0.05	0.23	0.05	0.05	0.1
hsa-miR-4796-5p	0.42	4.4	0.41	0.78	0.001	0.19	0.24	0.05	0.65	0.88	0.49	0.36	0.2	0.95	0.33	0.69	0.37	0.86	0.49	1.73	0.52	0.49	0.22	0.14	0.18	1.15	0.63	1.1	0.47	0.09	0.48	0.33	0.26	0.38	0.52	0.09	0.41	0.75	0.4	0.14	0.69	1.94	0.35	0.74	0.72	0.56	0.1	0.14	0.39
hsa-miR-4802-3p	0.37	1.75	0.78	0.18	0.48	1.31	0.3	0.71	1.41	3.09	0.34	0.81	0.4	1.84	0.09	1.25	0.33	0.86	0.8	1.15	0.48	4.03	0.82	1.08	0.23	3.01	0.29	1.29	0.71	0.19	0.29	0.89	0.39	2.65	0.4	0.79	0.59	1.85	0.81	1.25	0.55	1.52	0.7	1.91	0.23	1.39	0.69	1.08	0.73
hsa-miR-4802-5p	1.53	4.26	2.38	2.1	2.3	2.29	2.46	2.14	4.36	3.87	3.19	2.93	2.93	5.44	1.23	6.51	1.4	1.85	1.64	3.33	1.7	5.5	2.89	4.98	1.56	8.63	2	2.72	1.75	0.85	1.44	2.82	1.75	3.08	1.6	2.19	2.76	3.26	2.71	2.36	2.6	4.25	2.23	2.65	1.49	5.02	1.92	2.1	2.16
hsa-miR-483-3p	13.71	18.54	57.79	2.74	143.61	1124.28	29.33	4.39	17.44	0.41	72.11	4.1	34.36	6.76	32.19	7.53	37.02	1069.27	53.71	48.76	28.87	3.13	31.39	0.52	23.6	3.36	43.28	3.67	35.65	2.23	12.46	57.62	41.98	1759.09	96.15	17.03	136.02	821.98	109.6	3226.98	14.34	6.28	88.37	998.71	16.08	6.28	16.91	33.7	29.78
hsa-miR-483-5p	120.85	22.89	124.38	15.97	126.07	255.81	37.09	7.14	24.16	0.51	63.28	2.25	28.01	7.23	80.01	6.88	72.32	419.35	119.62	20.27	117.49	3.13	45.91	0.7	77.89	1.37	137.25	2.24	77.01	8.43	32.64	7.33	104.87	375.3	171.56	38.94	101.91	275.8	81.55	1109.13	54.08	5.68	153.58	423.4	54.87	6.23	72.18	11.08	46.49
hsa-miR-484	344.37	784.52	618.46	382.43	376.91	670.36	550.39	274.9	761.6	706.82	525.73	851.07	757.41	1338.13	345.83	1217.75	352.66	828.13	551.1	665.11	350.61	467.67	789.8	377.31	563.77	1754.6	354.33	304.08	640.43	108.41	130.87	224	339.11	425.21	685.44	180.97	234.27	267.43	405.57	387.3	159.81	753.51	657.23	522.24	275.76	934.4	334.63	513.15	350.28
hsa-miR-485-3p	4.46	2.55	3.1	0.55	5.56	49.96	1.38	0.82	1.06	0.18	0.34	0.09	1.49	3.02	0.52	0.46	0.42	1.45	0.62	0.44	1.87	0.49	2.89	0.99	1.29	0.18	0.68	0.81	1.09	0.95	0.81	1.64	1.01	45.27	1.66	6.33	1.13	0.18	1.27	6.85	2.6	0.001	0.88	1.11	0.63	1.02	1.04	0.79	1.47
hsa-miR-485-5p	11.1	8.84	21.83	11.5	38.88	270.38	7.57	4.45	7.95	1.52	17.27	2.66	9.73	19.28	6.93	9.24	6.85	22.68	9.35	13.53	30.92	1.88	5.62	2.87	16.75	2.97	10.2	2.15	14.4	3.08	10.31	5.35	8.4	134.55	9.23	29.82	7.84	13.25	2.59	17.45	10.73	3.6	10.02	7.16	14.18	8.97	19.43	14.21	9.65
hsa-miR-486-3p	3.02	8.28	9.05	19.85	36.91	16.2	11.3	0.82	4.65	1.98	53.96	8.93	2.23	15.27	1.04	6.6	5.5	7.05	11.3	52.26	16.05	1.97	3.38	41.77	33.26	1.95	0.98	3.77	14.97	45.66	24.5	0.94	3.72	8.37	18.51	1.77	28.4	5.11	1.32	0.74	0.59	0.97	36.04	0.16	0.9	2.14	0.59	4.58	6.37
hsa-miR-486-5p	84.88	24.59	108.03	64.1	89.59	54.3	36.66	7.25	52.73	25.93	81.43	20.83	29.4	26.23	29.44	52.6	57.26	18.25	103.62	82.65	42.53	20.3	47.77	147.81	124.91	17.97	39.13	8.3	97.88	148.43	110.93	4.6	58.3	16.18	52.32	12.38	103.45	15.58	154.87	82.47	67.5	64.96	121.12	11.72	56.23	18.69	88.6	42.12	66.86
hsa-miR-487a-3p	5.3	7.28	10.97	1.87	78.57	546.26	4.93	2.75	7.66	0.6	4.07	0.63	3.97	9.78	2.85	2.82	2.14	4.2	2.84	3.99	7.44	2.46	4.26	1.79	3.54	1.37	2	1.05	4.34	2.08	2.54	9.02	3.98	235.31	3.5	13.17	2.76	0.22	4.26	38.92	7.49	0.69	4.81	4.67	4.79	9.2	12.67	20.43	2.79
hsa-miR-487a-5p	3.95	2.32	7.24	1.55	10.83	114.39	2.89	1.98	2.53	1.11	2.99	0.32	3.08	8.46	2.09	3.88	0.93	1.9	1.51	5.19	6.83	1.92	2.4	0.66	3.5	1.15	2.15	1.67	2.41	1.18	2.3	3.62	3.41	90.45	3.27	11.44	1.68	0.13	2.25	6.43	2.74	1.06	3.34	2.7	2.3	3.63	5.37	5.89	2.06
hsa-miR-487b-3p	44.32	51.65	104.97	33.85	249.89	2961.73	37.87	16.87	61.04	8.2	34.58	5.59	21.7	91.4	28.82	36.99	16.41	60.98	25.17	60.47	76.23	13.55	44.27	15.5	55.16	14.52	20.93	21.19	42.16	20.32	36.24	46.21	36.3	1133.19	33.35	111.93	29.35	39.83	47.17	126.89	57.5	15.79	33.22	29.85	40.19	47.13	59.95	91.85	36.15
hsa-miR-487b-5p	0.23	0.24	0.41	0.05	1.29	19.94	0.18	0.16	0.06	0.09	0.25	0.001	0.1	0.33	0.09	0.37	0.05	0.05	0.27	0.27	0.26	0.001	0.05	0.14	0.09	0.04	0.05	0.19	0.05	0.05	0.05	0.28	0.09	5.82	0.001	0.6	0.05	0.001	0.29	0.46	0.18	0.001	0.001	0.21	0.14	0.09	0.2	0.56	0.34
hsa-miR-488-3p	0.51	0.47	1.45	1.19	0.86	0.14	0.42	0.27	1.36	0.18	0.34	0.41	0.84	1.37	0.33	0.51	0.33	1.76	0.58	3.68	0.83	0.09	1.58	0.14	1.29	9.96	0.59	3.15	1.32	0.19	0.62	0.05	0.87	2.18	0.34	0.56	0.36	2.16	1.67	0.09	1.28	0.83	0.64	0.05	1.31	0.33	1.13	2.71	1.47
hsa-miR-489-3p	1.72	4.73	0.83	1.87	1.77	1.4	0.84	11.37	1.47	3.18	1.57	0.41	1.54	2.69	2.14	4.25	2.01	1.54	1.29	8.87	2.09	4.2	1.97	21.66	4.6	8.1	1.9	1	2.46	0.62	0.43	5.35	1.62	0.95	3.61	2.33	1.09	0.44	1.5	0.83	0.59	0.14	1.99	11.08	2.39	3.11	2.56	1.36	2.89
hsa-miR-490-3p	5.25	3.64	4.97	2.01	11.98	1.12	4.03	0.16	4.83	0.001	7.46	0.09	2.33	1.04	6.93	2.22	2.05	1.58	3.06	3.86	5.61	0.04	3.44	0.09	6.95	0.04	3.03	0.05	9.02	0.24	6.76	0.23	5.99	2.32	5.39	5.3	20.02	1.8	3.11	0.05	5.39	0.18	5.68	0.53	11.47	0.33	4.73	0.14	13.37
hsa-miR-490-5p	7.06	3.93	7.19	2.28	22.58	1.82	5.23	1.21	5.95	0.05	15.65	0.001	5.26	0.61	11.68	1.02	3.26	0.23	7.84	2.97	13.87	0.001	7.53	0.38	12.97	0.001	6.88	0.001	13.79	0.57	4.12	0.33	8.09	0.99	8.42	9.82	76.55	0.84	2.88	0.14	17.58	0.55	5.16	1.75	29.81	0.7	10.6	0.19	17.54
hsa-miR-491-5p	5.71	3.26	4.86	12.23	4.65	5.46	1.98	2.58	1.3	0.55	3.92	1.76	1.34	4.16	2.09	4.57	2.94	2.62	4.92	6.03	6.13	5.77	3.06	3.66	3.4	3.54	2.88	7.06	3.45	5.73	2.21	9.16	4.99	2.84	3.67	3.63	4.39	4.05	3.11	1.2	3.52	1.94	3.98	2.6	4.83	3.53	1.77	3.13	3.87
hsa-miR-493-3p	24.02	23.65	60.89	9.9	91.65	1066.61	14.73	10.27	23.45	3.04	6.57	2.39	11.22	33.65	5.22	15.47	11.05	19.47	7.31	26.35	23.61	3.8	17.58	5.22	17.25	4.52	10.98	5.92	16.1	8.86	13.76	13.9	15.09	497.03	11.69	109.75	7.38	0.88	12.84	46.93	12.83	4.34	14.24	22.16	12.06	13.2	37.47	24.26	8.13
hsa-miR-493-5p	22.58	39.12	52.51	9.54	290.73	3144.05	14.73	15.22	25.87	7.6	17.56	4.91	34.22	69.52	8.55	31.59	19.63	38.26	16	41.3	70.31	12.25	28.82	11.6	34.83	15.23	18.59	13.79	32.34	10.37	29.62	60.34	28.08	1651.98	23.61	94.12	25.59	2.42	25.74	142.35	56.95	9.23	15.59	46.45	39.34	73.02	72.62	75.82	13.91
hsa-miR-494-3p	20.54	15.09	24.42	3.7	64.14	293.21	5.59	2.64	9.78	1.52	9.32	0.45	3.87	5.25	7.88	5.91	7.23	10.07	10.1	9.54	12.96	3	7.81	3.57	7.04	2.04	8.88	4.82	12.84	5.3	5.8	9.3	10.54	269.05	14.15	40.15	5.3	0.53	14.46	59.93	11.05	1.34	9.2	6.73	4.29	5.81	19.43	13.65	8.47
hsa-miR-495-3p	18.77	7.71	39.37	7.98	28.38	113.78	9.68	4.12	22.57	4.1	5.4	0.99	9.98	22.02	5.22	4.02	3.26	16.9	5.85	12.42	8.26	2.33	23.04	6.53	24.57	3.54	4.78	5.44	11.19	5.16	7.38	2.86	5.9	63.06	10.54	38.2	3.99	9.9	12.84	15.5	8.95	1.39	8.79	5.2	7.27	13.81	16.27	10.56	9.6
hsa-miR-495-5p	2.09	1.99	6.1	1.05	6.81	56.21	1.68	0.6	4.77	0.37	2.26	0.36	1.69	4.21	2.14	1.94	0.75	1.85	1.95	5.32	4.39	0.85	3.28	0.38	3.27	0.71	1.41	0.81	3.35	0.47	1.77	1.41	2.14	33.12	2.52	5.68	1.36	1.06	2.76	1.8	2.97	0.69	2.34	1.01	3.03	3.58	3.25	3.79	2.4
hsa-miR-496	0.98	1.7	3.05	1.32	25.02	258.56	0.84	0.49	1.47	0.41	1.82	0.54	0.35	1.61	0.81	1.39	0.37	2.21	0.44	1.77	3.87	0.49	1.36	0.33	0.83	0.75	0.49	0.76	0.94	0.38	0.48	1.36	0.66	35.58	0.97	4	1	2.24	1.27	3.52	2.6	0.78	0.94	1.91	0.68	2.37	2.27	4.81	0.44
hsa-miR-497-3p	0.84	0.43	0.57	0.27	0.48	0.05	0.3	0.05	0.82	0.09	0.49	0.41	0.35	0.24	0.28	0.37	0.23	1.4	0.53	0.62	0.65	0.18	1.31	0.09	0.74	0.001	0.54	0.38	1.94	0.19	0.001	0.001	1.22	0.9	0.69	0.6	0.32	0.04	3.46	0.05	0.64	0.05	0.94	0.27	0.5	0.23	0.35	0.42	0.88
hsa-miR-497-5p	1284.56	458.08	1671.72	473.82	1295.21	421.42	909.4	374.28	807.27	216.8	1041.76	895.39	921.24	955.64	565.69	1220.2	490.78	1121.67	1210.92	1157.25	1150.71	725.8	1309.21	336.86	1647.83	227.84	698.95	1083.02	2202.92	422.47	915.93	255	1716.43	1513.74	1214.34	1427.92	1490.31	239.97	1375.14	110.93	1672.1	190.49	1206	364.6	1745.33	524.79	718.8	560.17	1711.19
hsa-miR-4999-5p	0.51	0.61	0.78	0.73	1.15	0.37	0.3	0.55	0.82	0.55	1.82	1.35	0.45	0.76	0.57	1.06	0.61	0.18	1.02	0.49	0.57	0.27	0.71	0.23	0.23	0.22	1.41	0.67	0.61	0.81	0.67	0.09	1.05	0.66	0.4	0.65	1	0.75	0.46	0.05	1.42	2.95	1.76	0.58	0.68	0.19	0.69	1.17	0.83
hsa-miR-499a-5p	90.23	136.5	155.88	53.52	222.8	2845.47	92.14	58.23	88.2	81.25	245.43	512.72	125.09	268.78	131.82	202.54	131.31	126.53	198.46	363.61	237.6	97.94	61.96	26.78	66.16	168.3	156.04	243.54	107.56	20.65	85.23	43.49	96.43	163.88	162.85	82.35	124.25	115.23	98.66	39.15	95.5	364.87	119.77	79.11	160.87	56.24	68.29	101.99	120.11
hsa-miR-499b-5p	0.05	0.05	0.36	0.27	0.14	0.65	0.24	0.16	0.35	0.14	0.29	0.05	0.3	0.52	0.24	0.14	0.33	0.05	0.18	0.4	0.04	0.13	0.001	0.001	0.14	0.13	0.2	0.19	0.09	0.05	0.1	0.09	0.13	0.09	0.46	0.28	0.14	0.18	0.58	0.51	0.37	0.32	0.06	0.11	0.23	0.23	0.1	0.19	0.24
hsa-miR-5001-3p	0.42	1.75	0.93	0.23	1.15	5.6	1.02	1.26	0.88	3.92	0.98	0.72	0.6	3.12	0.19	1.8	0.89	2.12	1.06	4.75	0.87	1.43	2.13	0.8	1.29	9.38	0.63	0.91	1.32	0.81	0.29	5.59	0.52	2.98	1.2	1.4	0.91	1.28	1.04	1.11	1.05	1.29	1.05	6.68	0.95	2.6	0.99	2.43	0.39
hsa-miR-5006-3p	0.09	0.19	0.16	0.05	0.05	0.23	0.001	0.22	0.12	0.14	0.2	0.5	0.05	0.19	0.09	0.32	0.23	0.23	0.27	0.49	0.17	0.31	0.11	0.05	0.05	0.53	0.15	0.33	0.09	0.28	0.1	0.14	0.17	0.43	0.23	0.33	0.09	0.18	0.12	0.74	0.23	0.6	0.18	0.53	0.05	0.19	0.1	0.51	0.05
hsa-miR-500a-3p	23.18	26.86	16.25	33.31	11.6	11.35	7.27	8.62	7.78	10.82	5.79	8.66	4.82	13.8	7.03	14.45	5.36	49.28	13.34	19.61	5.87	31.8	28.06	19.97	17.62	24.92	7.17	21.23	14.4	39.74	6.47	31.32	8.48	22.9	11.57	26.38	9.6	20.16	9.96	36.28	8.54	9.79	14.36	19.14	5.42	9.62	7.25	11.36	19.64
hsa-miR-500a-5p	16.21	34.01	10.66	20.3	5.75	11.11	8.41	10.82	22.74	19.85	2.65	5.95	10.93	16.16	3.23	10.76	5.6	43.59	6.51	8.65	3.78	30.1	19.38	22.22	11.23	29.84	4.39	8.64	8.83	33.82	3.64	20.71	5.82	24.17	8.37	27.03	4.57	10.78	8.7	52.99	5.25	6.42	10.25	17.71	4.25	16.22	8.63	16.78	11.36
hsa-miR-500b-5p	0.23	0.33	0.05	0.41	0.1	0.09	0.12	0.33	0.41	0.28	0.1	0.14	0.35	0.19	0.001	0.23	0.09	0.59	0.22	0.04	0.001	0.36	0.38	0.8	0.09	0.89	0.1	0.19	0.19	0.28	0.05	0.09	0.17	1.04	0.06	0.23	0.27	0.09	0.46	0.42	0.14	0.14	0.18	0.58	0.05	0.23	0.2	0.42	0.24
hsa-miR-501-3p	32.1	49.05	26.28	50.51	23.49	26.24	15.93	18.35	20.33	38	14.52	11.41	11.57	26.75	10.21	26.32	9.05	57.87	18.21	40.5	11.65	84.08	50.33	41.2	37.4	51.08	14.1	17.61	23.04	46.23	13.57	79.5	16.84	33.45	21.66	51.04	20.88	37.54	13.76	27.86	22.65	14.82	24.08	39.34	13.14	29.47	18	22.86	28.85
hsa-miR-501-5p	6.23	23.32	6.73	16.33	4.99	14.8	4.51	5.22	10.13	19.48	1.37	2.61	3.38	9.78	1.42	5.54	2.52	34.15	2.53	6.7	1.87	44.77	9.28	10.76	5.2	18.46	1.41	5.15	4.11	13.5	1.34	16.72	3.76	17.03	6.25	13.21	1.36	6.69	3.8	30.59	2.69	2.4	5.92	22.11	1.76	14.41	4.54	16.78	3.72
hsa-miR-5010-3p	2.14	10.5	2.22	2.78	1.29	4.81	0.66	4.45	0.94	5.34	1.28	3.34	0.74	2.17	0.62	1.48	2.24	8.63	1.99	5.81	1.04	8.41	1.69	2.07	1.2	4.78	1.71	5.92	1.79	6.54	1.05	5.45	1.75	5.39	2.41	4.28	1.31	2.42	2.13	6.02	1.64	2.54	2.11	9.6	0.68	5.86	1.04	4.86	1.37
hsa-miR-502-3p	36.29	41.48	25.82	60.23	19.22	13.91	11.18	16.26	14.79	17.27	11.38	11.54	11.02	16.78	8.78	30.99	12.4	60.53	19.5	47.03	10.04	51.88	31.06	24.05	26.32	41.35	16.25	29.39	30.64	52.52	11.22	42.08	19.16	37.09	28.82	28.61	17.03	27.64	19.29	42.9	12.15	14.73	26.19	25.5	11.43	15.99	16.47	17.39	21.41
hsa-miR-502-5p	1.16	3.69	1.14	3.1	0.91	1.91	1.68	4.89	3.06	3.45	0.39	0.59	1.59	2.36	0.43	0.88	1.45	12.38	0.75	1.46	0.26	4.47	1.91	1.13	0.87	1.51	0.63	1	1.79	3.84	0.29	5.12	0.92	3.5	1.15	4.19	0.5	1.58	1.32	6.8	0.14	1.15	1	7.11	0.32	1.26	1.13	2.85	0.78
hsa-miR-503-3p	0.98	0.47	2.28	0.5	1.92	0.61	0.42	0.16	1.47	0.55	1.03	0.36	0.79	0.66	0.57	0.46	0.7	0.27	1.68	1.73	1.91	0.18	0.82	0.09	1.15	0.89	1.17	0.19	1.27	0.19	0.48	1.31	1.09	0.9	0.74	0.93	1.72	0.57	0.63	0.05	0.78	0.18	1.46	0.48	1.72	0.6	1.87	0.33	2.11
hsa-miR-503-5p	30.99	19.16	36.37	21.49	37.2	22.69	10.34	6.37	34.65	5.94	13.59	6.18	20.21	20.42	7.55	19.03	13.52	18.39	10.99	27.73	32.48	15.52	29.48	4.93	27.88	14.74	12.59	9.5	27.2	7.63	14.14	14.6	21.78	15.42	20.06	71.74	14.9	3.79	26.26	8.14	20.69	3.6	32.76	25.03	19.06	14.83	30.77	17.34	20.52
hsa-miR-505-3p	126.7	78.47	105.75	21.12	18.65	31.19	47.78	17.69	61.98	30.81	15.26	7.89	50.8	35.82	50.43	30.06	53.53	162.63	68.21	50.27	36.79	314.67	62.5	42.14	55.07	68.53	97.49	39.65	48.11	45.8	22.82	36.44	58.39	28.53	215.45	35.22	44.84	42.74	50.91	14.3	57.64	120.08	128.8	23.81	35.68	48.48	30.52	33.61	48.15
hsa-miR-505-5p	19.19	17.45	24.42	5.66	9.4	11.3	11.78	5.33	15.14	12.53	26.78	23.17	12.51	6.52	9.54	16.26	17.11	24.48	30.8	64.91	16.39	52.55	10.48	5.54	14.77	32	39.08	5.68	26.63	8.34	4.27	6.39	21.56	12.87	50.88	5.68	14.9	16.73	3.86	4.77	18.54	51.85	43.3	8.43	13.1	22.73	8.63	12.34	8.33
hsa-miR-509-3p	0.09	0.33	0.05	0.05	0.1	0.42	0.001	3.13	0.06	0.09	0.001	3.25	0.25	0.47	0.001	0.69	0.28	0.23	0.18	0.18	0.3	5.68	0.05	0.001	0.001	1.73	0.2	0.38	0.001	7.96	0.05	0.38	0.13	0.38	0.23	0.93	0.18	1.06	0.23	1.34	0.18	0.09	0.06	0.11	0.09	0.19	0.2	1.54	0.001
hsa-miR-511-3p	6.55	3.83	10.4	9.4	6.42	2.52	8.84	9.56	29.22	4.84	4.76	0.5	4.72	5.44	6.55	1.71	4.66	1.36	5.94	2.48	6	2.06	10.37	2.11	3.5	7.26	4.24	13.03	8.12	10.51	4.65	2.72	4.9	2.84	5.84	7.3	4.03	0.84	23.84	1.43	9.91	1.11	6.74	2.86	7.81	4.23	11.59	3.55	10.58
hsa-miR-511-5p	11.8	12.39	34.97	18.84	12.22	9.9	25.3	24.34	23.27	11.56	18.98	3.61	9.78	10.02	7.17	13.76	12.82	4.47	10.99	15.48	24.74	7.56	14.74	3.29	6.44	30.5	21.96	19.47	16.76	6.73	7.62	6.9	20.82	13.06	28.25	7.3	10.28	6.87	20.85	6.29	10	5.31	30.47	7.58	14.32	9.02	18.19	10.42	11.51
hsa-miR-512-3p	12.59	37.51	2.43	1.96	0.29	0.65	0.66	1.43	0.12	224.49	0.25	41.52	1.24	15.03	5.08	969.81	8.95	0.23	0.62	0.89	0.09	0.4	3.44	4147.76	16.33	0.93	0.15	40.41	0.61	0.57	0.43	4.23	0.35	15.09	0.4	1.77	0.36	0.66	0.12	0.69	0.78	0.18	0.41	0.48	0.27	85.48	0.35	0.75	0.54
hsa-miR-518b	4.04	21	3.36	1.73	0.1	0.98	0.06	0.6	0.24	116.58	0.15	14.11	0.5	6.19	2.37	329.67	5.97	0.18	1.02	0.98	0.22	0.22	2.13	2533.55	11.41	1.33	0.39	68.04	0.33	0.62	0.14	1.55	0.17	8.61	0.29	1.07	0.09	0.13	0.23	0.46	0.69	0.001	0.12	0.64	0.14	50.2	0.25	0.47	0.29
hsa-miR-5193	0.37	0.38	0.41	0.14	0.14	0.19	0.001	0.16	0.18	0.18	0.15	0.14	0.65	0.001	0.09	0.32	0.42	0.81	0.27	0.71	0.09	0.4	0.49	0.23	0.37	0.66	0.2	0.19	0.38	0.28	0.001	0.28	0.26	0.28	0.57	0.19	0.36	0.4	0.12	0.001	0.14	0.23	0.18	0.21	0.14	0.42	0.49	0.14	0.15
hsa-miR-520d-5p	1.67	8.04	0.88	0.37	0.19	0.19	0.12	0.05	0.18	50.8	0.05	1.71	0.001	0.95	0.57	40.27	1.45	0.001	0.22	0.22	0.09	0.09	0.38	909.34	2.9	0.18	0.001	8.35	0.09	0.05	0.001	0.47	0.001	2.27	0.23	0.28	0.001	0.001	0.06	0.19	0.18	0.05	0.06	0.001	0.32	17.25	0.25	0.05	0.05
hsa-miR-522-3p	0.46	3.17	0.88	0.68	0.91	0.33	0.001	0.27	0.06	55.5	0.25	6.22	0.3	2.69	0.47	128.29	1.59	0.001	0.09	0.22	0.09	0.04	1.04	1121.13	4	0.44	0.05	13.74	0.28	0.05	0.1	0.8	0.13	2.37	0.63	0.98	0.23	0.4	0.001	0.09	0.82	0.001	0.12	0.05	0.14	36.26	0.3	0.14	0.05
hsa-miR-532-3p	24.9	51.65	26.8	102.52	20.37	22.22	9.92	13.57	26.46	76.87	16.04	37.42	49.51	65.32	10.07	32.74	14.27	107.38	13.87	22.27	10.35	70.35	40.67	43.04	46.1	84.11	14.74	45.28	16.43	45.94	5.56	31.75	21.56	45.89	21.89	24.61	10.28	44.28	11.58	66.45	8.68	19.76	23.09	27.78	11.34	16.13	20.31	27.53	44.28
hsa-miR-532-5p	564.83	1287.25	481.1	1301.69	446.18	734.84	294.28	451.3	443.61	804.42	515.87	1068.32	448.13	834.98	446.08	1135.92	543.24	1646.37	581.95	985.12	821.19	2995.75	507.79	770.5	611.02	1892.05	670.17	934.73	769.7	944.54	268.69	1200.04	685.45	1510.48	519.9	998.33	371.65	1003.98	270.74	1786.27	541.3	1005.96	534.41	1426.67	720.7	917.1	439.4	731.21	467.79
hsa-miR-539-3p	0.88	1.32	0.93	0.18	3.36	24.28	0.3	0.11	0.53	0.05	0.39	0.001	0.05	0.24	0.09	0.18	0.28	0.59	0.31	0.31	0.83	0.09	0.33	0.19	0.37	0.09	0.29	0.52	0.85	0.14	0.24	0.7	0.48	18.21	1.2	1.67	0.18	0.001	1.21	4.81	0.23	0.001	0.35	0.27	0.14	0.28	0.89	1.22	0.24
hsa-miR-539-5p	0.65	0.71	0.26	0.18	2.59	30.11	0.24	0.27	0.35	0.23	0.1	0.001	0.2	1.7	0.19	0.05	0.09	0.5	0.13	0.04	0.52	0.22	0.44	0.33	0.97	0.04	0.24	0.24	0.42	0.47	0.86	0.38	0.22	15.28	0.11	2.56	0.14	0.18	0.17	2.45	1.1	0.05	0.23	0.32	0.05	0.51	0.94	2.34	0.1
hsa-miR-542-3p	3.81	2.7	1.5	1	2.49	0.65	1.5	0.22	4.01	0.51	1.82	0.14	1.89	1.09	0.95	1.15	1.31	1.9	0.62	0.84	2.52	0.76	0.98	0.23	0.92	0.35	1.12	0.62	1.7	0.57	0.38	0.89	2.23	1.28	2.23	3.02	0.77	0.09	5.93	0.69	1.19	0.23	2.11	1.33	2.26	0.88	1.97	1.4	2.16
hsa-miR-542-5p	52.41	34.67	46.77	25.28	87.15	41.88	30.65	18.29	75.54	21.05	68.68	14.07	62.67	58.79	34.43	51.77	37.3	26.07	23.53	38.64	143.41	27.19	33.19	10.34	66.02	39	48.11	13.93	63.5	18.57	42.9	76.83	68.18	42.1	43.78	150.64	73.56	14.26	40.89	10.41	76.36	14.45	49.34	50.32	103.74	48.85	56.75	41.09	57.95
hsa-miR-543	2.56	3.69	10.5	5.75	14.62	62	2.76	1.21	2.71	0.64	5.4	1.26	3.97	5.72	1.38	8.27	2.94	12.6	4.43	15.22	10.44	2.55	6	1.22	6.49	2.17	2.93	1.81	9.96	0.62	1.63	3.38	5.03	85.25	7.33	1.44	3.13	10.34	8.93	15.64	2.74	1.71	10.72	4.77	4.02	8.41	5.72	11.97	2.16
hsa-miR-544a	0.23	0.24	0.36	0.09	2.3	26.8	0.42	0.22	0.47	0.14	0.25	0.05	0.15	0.47	0.09	0.23	0.14	0.27	0.27	0.22	0.57	0.04	0.44	0.14	0.32	0.001	0.24	0.19	0.47	0.19	0.43	0.42	0.04	8.23	0.4	1.07	0.36	0.001	0.63	1.25	1.28	0.18	0.29	0.11	0.41	0.42	0.64	1.08	0.29
hsa-miR-545-3p	0.93	1.47	0.57	0.37	0.67	0.33	0.24	0.16	0.53	0.88	0.34	0.81	0.1	0.38	0.33	0.51	0.28	0.41	0.8	1.29	0.22	0.4	0.82	0.52	0.6	1.64	0.2	0.72	0.66	0.38	0.19	0.23	0.61	0.52	0.52	0.47	0.23	0.18	0.86	0.28	1.1	0.55	1.17	0.64	0.41	0.74	0.39	0.37	0.39
hsa-miR-545-5p	0.23	0.43	0.1	0.37	0.19	0.37	0.24	0.22	0.47	0.32	0.34	0.14	0.15	0.33	0.09	0.14	0.09	0.23	0.09	0.22	0.17	0.13	0.11	0.23	0.05	0.44	0.24	0.33	0.09	0.05	0.1	0.14	0.04	0.24	0.06	0.28	0.18	0.35	0.4	0.19	0.18	0.14	0.23	0.48	0.14	0.37	0.05	0.51	0.15
hsa-miR-548a-3p	0.23	1.56	0.001	0.78	0.05	0.05	0.001	0.11	0.18	0.83	0.1	0.001	0.05	0.47	0.09	0.14	0.09	0.68	0.27	0.35	0.09	1.03	0.11	2.07	0.18	2.43	0.05	0.1	0.38	0.43	0.001	0.19	0.04	0.09	0.29	0.42	0.14	0.001	0.17	0.05	0.23	0.05	0.06	1.59	0.14	0.6	0.1	0.28	0.1
hsa-miR-548ad-5p	4.51	12.63	3.62	16.84	1.58	2.75	2.7	5.49	6.78	10.87	5.2	11.5	7.35	13.04	1.8	10.44	2.38	2.39	5.23	4.13	3.48	21.33	8.52	13.15	2.39	22.53	1.66	1.72	5.48	7.34	4.55	5.45	3.32	4.45	5.67	2.37	2.76	4.27	2.88	3.24	5.75	8.13	3.75	16.97	3.43	6.28	4.49	6.4	4.46
hsa-miR-548ae-5p	3.72	50.94	7.5	16.38	4.84	14.66	4.15	3.02	4.3	3.32	2.75	1.98	2.63	10.35	1.47	8.27	1.68	7.68	2.79	3.42	5.57	11.18	3.55	5.4	5.43	13.06	2.68	3.05	3.87	4.17	3.55	2.63	2.41	5.11	2.64	8.61	6.52	1.85	4.49	8.61	3.38	2.45	4.16	3.66	3.25	14.32	2.07	7.57	5.09
hsa-miR-548ah-5p	5.44	8.23	12.21	14.55	3.55	0.7	6.73	0.55	11.25	0.64	6.13	2.84	4.57	3.64	9.45	56.25	2.94	3.48	4.83	1.42	6.31	7.92	6.66	1.83	3.27	0.62	7.22	3.24	5.62	0.57	3.98	4.65	3.63	2.46	3.27	1.07	4.08	0.88	6.91	0.23	6.12	14.96	5.45	2.12	2.21	6.18	6.56	5.05	2.35
hsa-miR-548ak	1.07	5.2	0.98	0.41	0.38	2.24	0.36	0.16	3.3	0.46	0.29	0.41	1.64	1.47	0.43	0.79	0.65	2.53	0.49	5.94	0.91	0.27	1.04	0.09	1.56	1.59	1.32	1.43	0.71	0.19	0.19	0.75	2.36	1.94	3.15	0.42	0.54	3.3	1.09	3.79	2.6	0.51	0.94	0.11	0.54	1.44	0.54	1.73	1.18
hsa-miR-548am-5p	1.63	1.99	1.55	0.05	1.2	0.05	0.06	0.55	0.001	0.74	0.05	0.72	0.35	0.05	1.71	0.001	0.23	0.05	1.11	4.61	0.04	1.61	1.31	0.89	0.001	2.17	0.001	1.96	1.56	0.24	0.62	1.03	0.39	0.09	0.17	0.28	2.76	1.67	1.96	0.65	2.06	0.09	0.06	0.53	2.17	0.46	0.001	0.98	1.42
hsa-miR-548ap-3p	3.76	16.22	1.71	13.05	4.7	2.19	1.2	3.96	4.24	23.63	5.4	2.57	2.58	4.96	3.56	3.83	2.89	5.78	5.94	12.87	0.7	2.33	0.98	7.89	2.44	29.79	4.73	9.73	4.53	3.13	0.81	3.24	2.54	0.71	3.38	1.12	4.03	5.15	5.36	1.62	5.07	4.25	3.28	2.7	3.57	3.49	3.45	2.66	3.04
hsa-miR-548ap-5p	1.72	7.66	1.81	11.68	3.31	7.61	2.89	3.3	2.77	20.91	3.04	1.49	6.01	8.22	0.71	7.3	1.63	5.96	4.79	7.85	2.44	11.63	4.86	9.02	4.46	22.58	1.66	2.86	3.73	2.56	1.92	21.37	2.36	2.98	2.46	3.49	2.9	15.8	2.53	5.88	4.52	2.72	4.92	7.69	4.79	10.97	5.28	9.72	2.55
hsa-miR-548aq-3p	0.74	1.14	0.52	0.001	0.38	0.19	0.48	0.001	0.82	0.41	0.59	0.32	0.25	0.28	0.62	0.88	0.51	0.72	1.11	0.49	0.91	0.13	0.82	0.001	0.55	0.4	0.83	0.72	1.09	0.33	0.14	0.001	0.57	0.24	0.74	0.05	0.23	0.13	2.07	0.93	0.23	0.42	1.76	0.74	0.36	0.19	0.25	0.001	1.32
hsa-miR-548ar-5p	1.39	5.39	0.93	1.46	0.81	1.21	1.02	1.26	1.83	2.53	0.93	0.59	0.65	2.93	0.33	2.63	0.47	2.44	1.37	2	0.57	2.1	1.09	3.9	0.46	3.23	0.98	1.48	1.09	0.71	0.53	1.31	1.09	0.57	1.26	1.54	0.86	0.97	2.65	2.41	1.32	0.92	2.17	1.06	1.31	3.77	0.69	2.1	0.98
hsa-miR-548at-5p	0.09	1.23	0.26	0.55	0.38	0.42	0.18	1.04	0.18	1.11	0.39	0.23	0.1	0.99	0.05	0.83	0.05	0.63	0.18	0.49	0.3	0.49	0.44	0.85	0.18	1.73	0.05	0.81	0.42	0.81	0.29	0.89	0.22	0.57	0.4	0.84	0.32	0.44	0.12	0.37	0.27	0.37	0.7	0.42	0.45	0.93	0.35	0.42	0.2
hsa-miR-548au-5p	3.81	4.97	3.88	2.65	2.68	0.61	3.61	2.03	1.12	3.68	3.09	1.8	0.84	0.95	3.09	4.9	1.82	1.76	3.37	2.09	0.87	3.44	3.55	1.27	0.69	1.81	3.27	6.3	2.36	1.52	1.49	0.99	1.36	1.14	1.32	2.37	3.4	1.58	8.29	2.27	0.5	3.37	4.98	1.22	1.99	1.49	2.96	1.12	2.94
hsa-miR-548av-5p	0.79	4.45	1.14	2.83	0.43	0.51	0.54	0.33	0.82	0.69	0.49	0.95	0.35	0.57	0.47	1.34	0.37	0.72	0.62	1.15	0.26	1.3	1.31	1.27	0.55	2.04	0.98	1.05	0.94	0.76	0.29	1.17	0.35	0.43	0.52	1.21	0.36	0.66	1.15	0.42	0.73	0.6	0.94	0.85	0.81	1.49	0.84	0.7	0.78
hsa-miR-548aw	1.21	0.95	0.62	1.64	0.43	0.37	0.42	0.71	1.12	0.41	0.93	0.9	0.6	1.37	1	0.69	0.33	0.95	0.4	1.33	0.7	0.81	1.42	1.36	1.61	0.62	0.68	1.19	1.23	0.95	0.53	0.8	1.44	1.14	0.52	1.49	0.77	0.35	1.32	0.37	0.96	1.06	0.64	0.58	1.17	0.28	0.74	0.7	2.2
hsa-miR-548ay-5p	2.18	23.18	2.79	8.03	2.78	6.3	1.38	2.91	3.06	14.14	2.8	4.19	2.14	3.88	1.42	2.68	1.82	3.75	3.37	3.19	1.57	12.21	2.24	6.77	2.25	7.17	2.44	5.06	1.61	2.6	1.2	3.33	2.19	1.94	2.23	3.21	2.54	4.4	2.82	3.42	2.19	5.03	3.22	4.72	1.85	8.65	1.82	5.89	1.96
hsa-miR-548az-5p	0.33	3.17	0.31	0.09	0.43	0.51	0.06	0.99	0.47	2.44	0.74	1.04	1.29	4.96	0.33	0.51	0.33	0.99	0.44	1.06	0.74	1.3	0.11	0.28	0.23	0.49	0.59	0.14	0.33	0.62	0.19	0.7	0.13	0.8	0.34	0.23	0.41	0.44	0.35	0.65	0.59	0.74	0.88	0.9	0.59	0.65	0.25	0.89	0.98
hsa-miR-548b-3p	5.71	41.62	2.74	3.88	4.99	10.51	3.55	0.66	4.24	13.03	7.31	10.23	2.23	2.84	5.22	9.33	1.63	12.92	6.6	8.21	4	30.46	3.17	9.26	1.89	10.58	4.24	11.5	3.02	0.71	1.77	0.75	3.76	3.55	6.36	0.98	4.85	9.24	8.58	9.07	4.06	37.21	8.5	1.01	2.98	7.3	1.82	4.77	5.44
hsa-miR-548b-5p	0.42	3.83	0.05	0.09	0.29	1.03	0.06	0.05	0.18	1.34	0.49	0.9	0.1	0.19	0.19	0.23	0.19	0.72	0.22	0.27	0.22	1.21	0.05	0.8	0.05	0.62	0.44	1	0.001	0.001	0.1	0.09	0.22	0.28	0.17	0.001	0.18	1.32	0.46	0.74	0.18	1.15	0.23	0.11	0.05	0.28	0.15	0.42	0.2
hsa-miR-548d-3p	0.28	3.97	0.05	1.87	0.43	0.51	0.12	0.27	0.12	1.66	0.05	0.27	0.05	0.14	0.09	0.001	0.09	0.36	0.13	0.35	0.001	1.03	0.27	1.93	0.18	0.49	0.001	0.43	0.24	0.24	0.05	0.001	0.001	0.38	0.11	0.33	0.14	0.13	0.23	0.32	0.05	0.09	0.12	0.9	0.09	0.05	0.001	0.19	0.15
hsa-miR-548e-3p	1.02	1.7	0.67	1.37	0.72	0.51	0.3	0.33	0.88	0.55	0.49	0.18	0.74	0.95	0.19	0.69	0.33	1.04	0.35	0.93	0.43	0.18	0.87	0.7	0.6	1.55	0.59	0.91	0.9	1.18	0.29	0.42	0.22	0.8	1.2	0.56	0.41	0.53	0.63	1.06	0.5	0.46	1.35	0.32	0.32	0.6	0.54	0.89	0.73
hsa-miR-548e-5p	0.51	1.32	0.36	0.78	0.14	0.56	0.3	0.38	0.35	0.78	0.39	0.18	0.15	0.14	0.14	0.46	0.28	0.63	0.18	0.67	0.22	0.36	0.66	0.23	0.14	0.09	0.39	0.33	0.42	0.14	0.24	0.14	0.57	0.09	0.63	0.28	0.05	0.09	0.46	0.09	0.14	0.14	0.64	0.27	0.09	0.23	0.2	0.23	0.24
hsa-miR-548f-3p	7.34	14.57	6.93	3.6	3.74	1.87	2.22	0.77	3.18	2.4	3.92	1.76	1.49	1.37	5.75	5.91	4.76	5.78	12.28	10.34	9.52	2.77	3.55	5.45	2.35	5.31	8.73	5.44	6.09	0.66	1.39	1.13	5.86	1.42	10.31	1.3	2.99	2.02	17.74	8.28	2.06	3.14	11.37	6.36	3.84	1.67	1.58	1.73	7.74
hsa-miR-548j-5p	0.14	0.66	0.16	0.82	0.24	0.42	0.24	0.05	0.12	0.83	0.05	0.05	0.45	0.52	0.05	0.23	0.05	0.5	0.22	0.44	0.09	0.45	0.11	0.19	0.23	0.8	0.1	0.14	0.05	0.14	0.14	0.66	0.09	0.14	0.17	0.23	0.32	1.76	0.06	0.14	0.18	0.23	0.18	0.11	0.27	0.6	0.25	0.33	0.24
hsa-miR-548k	9.43	100.93	11.74	27.24	9.59	21.76	6.91	18.02	16.09	33.39	11.48	16.23	12.76	27.27	6.98	15.61	13.9	22.27	11.79	28.93	13.96	34.26	14.19	15.46	12.56	47.37	15.52	21.28	12.37	8.71	7.77	24.23	10.1	10.6	11.4	22.52	8.02	15.27	8.01	15.36	13.24	26.22	13.48	28.1	13.55	43.55	10.7	17.95	9.36
hsa-miR-548l	0.28	3.26	0.52	0.87	0.34	2.33	0.24	0.77	0.24	3.27	0.1	0.27	0.35	1.84	0.28	0.46	0.14	0.54	0.22	0.8	0.43	1.7	0.55	0.7	0.05	1.68	0.39	0.24	0.38	0.57	0.29	0.85	0.39	0.47	0.34	1.16	0.23	0.44	0.4	0.79	0.64	0.42	0.23	1.91	0.36	0.88	0.25	1.4	0.39
hsa-miR-548o-5p	0.79	0.14	0.001	1.1	0.05	1.77	1.02	0.001	0.88	1.57	0.59	0.45	1.14	3.26	0.76	3.28	0.001	2.48	0.22	0.09	0.35	0.49	1.31	0.05	0.74	1.15	1.07	0.001	0.9	0.001	0.05	0.28	2.27	0.71	0.11	2.05	0.05	3.83	2.65	3.01	0.001	2.22	1.29	0.9	0.5	0.6	0.2	0.05	1.91
hsa-miR-548q	1.86	2.22	2.22	3.19	2.01	0.93	1.5	1.59	1.65	1.52	3.68	3.16	2.19	1.94	2.28	4.39	1.77	1.76	2.75	3.68	3.61	1.43	1.58	1.46	2.07	3.63	3.12	1.67	3.4	1.47	0.67	1.31	3.11	4.35	3.72	1.21	2.72	5.15	1.27	3.61	2.19	3.37	2.46	2.6	2.12	1.07	1.73	1.96	1.81
hsa-miR-548v	0.14	0.28	0.67	0.23	0.19	0.37	0.48	0.38	0.12	0.51	0.29	0.86	0.05	0.66	0.47	0.32	0.19	1.49	0.44	0.44	0.48	0.81	0.001	0.52	0.14	0.58	0.15	0.48	0.33	0.001	0.05	0.14	0.35	0.28	0.34	0.19	0.45	0.13	0.52	0.05	0.46	0.42	0.76	0.16	0.14	0.74	0.15	0.56	0.34
hsa-miR-550a-3-5p	0.51	2.84	2.12	7.12	0.38	0.37	1.14	1.48	1.36	3.27	0.54	1.94	1.09	0.85	1.19	2.26	1.59	0.41	1.77	1.64	2.35	9.53	0.93	1.36	1.15	3.36	2.88	0.43	1.27	0.38	0.48	4.23	1.97	1.37	1.2	2.23	2.04	1.32	0.23	0.83	1.87	2.31	3.05	7.26	1.76	0.65	1.33	3.65	0.49
hsa-miR-550a-5p	0.7	4.92	1.24	2.05	1.29	3.27	1.08	4.18	0.47	2.67	1.32	2.34	0.7	1.99	0.71	2.86	0.89	2.89	2.17	2.97	1.35	5.23	0.27	1.88	0.55	3.94	1.56	1.29	1.27	2.79	0.67	2.35	0.61	1.32	1.2	0.7	1.13	1.67	0.86	9.58	0.59	3.19	5.1	3.82	1.22	1.67	0.89	2.99	0.64
hsa-miR-550b-3p	1.35	5.3	0.05	0.32	2.64	3.92	1.02	5.33	0.88	0.18	1.96	2.66	1.39	3.31	0.14	6.05	0.98	2.35	1.95	4.61	0.13	0.72	0.87	4.04	0.78	6.77	1.27	1.29	2.22	7.63	0.48	1.83	0.48	0.62	2.23	0.33	0.77	1.98	1.5	9.72	0.41	4.76	2.87	0.37	0.99	3.77	1.68	0.42	1.03
hsa-miR-551b-3p	1.86	1.75	0.31	6.07	0.14	1.49	1.26	0.55	0.71	27.08	0.25	0.23	1.54	4.96	0.14	2.26	1.63	51.05	0.84	7.01	0.35	24.78	1.42	1.17	3.5	37.14	0.83	0.24	1.75	1.28	0.53	13.48	0.57	0.85	4.99	5.12	2.67	4.31	2.42	0.19	0.87	0.65	1.46	1.22	0.72	7.44	0.39	2.29	0.49
hsa-miR-552-5p	0.79	407.09	0.67	0.32	2.83	0.7	0.06	2.09	0.88	0.69	5.59	3.11	0.55	42.91	5.75	18.93	0.47	0.27	1.29	15	0.87	0.31	0.27	1.93	0.74	6.37	2.24	13.5	0.42	0.43	0.53	0.19	0.57	0.99	0.29	0.37	1.63	133.14	1.56	0.42	3.2	120.22	0.88	0.42	0.23	0.42	0.25	1.73	1.47
hsa-miR-556-3p	0.98	15.66	5.9	7.21	1.77	1.96	1.38	0.16	2	3.5	6.77	1.85	2.33	2.41	2.18	2.22	1.49	5.15	2.84	2.88	2.96	5.59	1.36	1.64	0.87	1.42	2.1	4.25	1.56	0.62	1.68	0.61	1.62	2.41	1.83	0.14	2.63	12.02	2.71	1.39	1.37	3	1.58	1.48	2.62	2	1.04	0.89	3.04
hsa-miR-556-5p	1.3	12.25	3.73	7.16	1.82	1.68	1.92	0.001	2.65	4.93	4.51	0.99	1.74	1.56	1.52	2.49	2.01	5.87	3.68	3.59	2.13	4.7	2.62	1.88	0.64	0.93	2.83	2.19	1.79	0.57	1.2	0.33	1.36	2.6	3.21	0.28	2.58	5.11	2.65	2.96	2.47	1.99	3.52	2.12	2.71	4.23	1.38	1.5	2.2
hsa-miR-5582-3p	0.09	5.58	0.31	1.37	0.62	1.77	0.36	0.99	0.77	1.52	0.69	0.86	0.35	1.37	0.19	1.25	0.56	1.08	0.58	1.15	0.26	2.64	0.38	0.8	0.28	2.88	0.63	0.72	0.33	0.47	0.24	0.56	0.22	0.43	0.86	0.84	0.59	0.66	0.52	4.21	0.32	0.51	1.46	0.9	0.41	1.95	0.49	1.96	0.59
hsa-miR-5586-5p	0.05	0.28	0.05	0.14	0.001	0.05	0.001	0.11	0.41	0.18	0.05	0.05	0.1	0.61	0.05	0.001	0.09	0.32	0.04	0.84	0.04	0.13	0.44	0.28	0.14	1.86	0.1	0.1	0.28	0.05	0.1	0.47	0.13	0.24	0.06	0.88	0.14	0.13	0.23	0.28	0.32	0.001	0.18	0.16	0.32	0.37	0.05	0.42	0.05
hsa-miR-5588-3p	0.65	0.76	0.88	0.55	0.62	0.42	0.84	0.001	0.59	1.01	1.18	3.52	0.65	0.38	1.04	1.52	1.73	0.77	1.11	1.77	1.26	1.34	0.38	0.28	0.37	0.31	1.22	3.24	1.04	0.001	0.19	0.09	1.44	2.65	1.95	0.05	0.23	2.16	0.81	1.67	0.32	2.08	2.87	0.8	0.27	0.33	0.54	0.51	0.93
hsa-miR-5588-5p	0.93	0.43	0.67	0.59	0.48	0.47	0.42	0.05	0.41	0.74	0.78	1.98	0.45	0.28	0.38	0.97	0.75	0.5	0.75	1.73	1.74	0.67	0.11	0.19	0.18	0.09	1.46	2.82	0.66	0.05	0.24	0.19	1.14	1.89	1.03	0.05	0.36	1.32	0.81	0.14	0.14	1.02	1.7	0.27	0.27	0.001	0.15	0.19	0.98
hsa-miR-5589-3p	13.57	0.57	17.12	0.68	4.36	0.001	6.91	0.16	7.9	2.67	5.98	0.72	3.82	1.09	5.18	2.45	4.01	1.26	13.65	1.06	2.83	0.45	2.89	0.23	1.24	2.26	2.93	0.24	6	0.24	3.07	0.7	7.43	0.95	8.71	0.33	3.99	0.53	4.09	0.05	5.85	4.29	6.74	0.05	1.31	0.05	2.27	0.37	2.5
hsa-miR-5589-5p	20.72	1.94	25.2	3.88	15.15	0.47	10.7	0.88	20.21	5.9	25.36	5.55	12.96	2.84	10.26	21.38	13.52	1.31	29.03	3.73	11.91	0.72	11.19	0.19	2.99	4.29	11.86	0.48	12.94	0.19	9.64	3.94	20.56	2.65	22.69	0.7	11.82	1.8	5.24	0.14	13.15	16.71	32.4	1.11	4.7	0.05	9.42	0.37	5.83
hsa-miR-5590-3p	4.27	6.01	4.09	0.59	3.64	1.03	2.52	0.44	8.31	3.04	6.28	0.9	4.12	5.77	5.6	4.8	3.4	2.08	3.37	3.55	4.44	2.77	1.53	1.46	1.2	1.02	4.39	1.1	1.51	0.19	4.12	0.89	2.84	0.85	2.23	0.42	4.89	6.38	8.01	0.65	3.97	0.97	2.7	1.11	3.84	1.35	3.6	0.7	3.67
hsa-miR-5590-5p	2.28	5.25	3.73	0.73	2.59	0.61	2.04	0.38	4.07	1.11	5.94	0.9	3.38	3.02	4.42	9.19	2.75	2.12	5.14	11.31	6.22	3.89	2.02	1.13	0.92	1.11	4.34	1.19	2.22	0.43	2.35	0.42	2.58	1.42	4.35	0.28	4.21	5.59	4.49	1.02	3.15	1.66	4.34	2.12	2.98	1.81	2.12	0.7	3.58
hsa-miR-5690	0.98	2.84	1.6	4.24	1.05	0.42	0.6	0.77	1.53	2.58	0.98	0.23	0.94	1.09	0.47	1.71	0.75	2.44	1.24	7.1	0.61	4.83	2.18	0.75	0.74	3.14	1.56	1.05	1.18	0.57	0.38	0.47	1.05	0.8	1.49	0.42	0.59	1.28	0.98	0.56	0.55	0.65	1.76	0.27	0.9	0.79	0.64	1.03	0.83
hsa-miR-5695	0.05	0.19	0.1	0.37	0.05	0.33	0.001	0.22	0.06	0.23	0.05	0.09	0.15	0.24	0.001	0.65	0.14	0.72	0.04	0.27	0.09	1.03	0.001	0.23	0.09	0.04	0.05	0.05	0.09	0.28	0.05	0.14	0.13	0.09	0.001	0.05	0.05	0.04	0.17	0.14	0.05	0.18	0.001	0.27	0.05	0.28	0.05	0.05	0.1
hsa-miR-5697	0.001	0.95	0.001	0.09	0.05	0.05	0.001	0.27	0.06	0.37	0.2	0.18	0.15	0.38	0.09	0.6	0.14	0.14	0.001	0.09	0.17	0.22	0.16	0.38	0.18	0.84	0.29	0.24	0.09	0.09	0.19	0.75	0.22	0.19	0.06	0.37	0.18	0.62	0.17	0.09	0.05	0.05	0.18	0.27	0.001	0.93	0.15	0.05	0.1
hsa-miR-5699-3p	0.09	1.23	0.21	1.46	0.34	0.56	0.42	1.32	0.24	0.83	0.1	0.41	0.05	0.19	0.09	0.18	0.14	0.5	0.18	0.001	0.35	0.85	0.16	0.05	0.14	0.18	0.1	0.19	0.28	0.19	0.1	0.52	0.17	0.14	0.29	0.28	0.18	0.04	0.35	1.43	0.09	0.28	0.53	0.21	0.05	0.09	0.1	0.05	0.15
hsa-miR-5699-5p	0.56	1.8	0.72	0.96	0.24	0.33	0.18	0.38	0.18	1.11	0.39	0.18	0.25	0.05	0.05	0.69	0.42	1.31	0.44	0.13	0.43	1.12	0.27	0.05	0.09	0.35	0.63	0.91	0.57	0.57	0.1	0.38	0.52	0.33	0.4	0.51	0.41	0.4	0.63	4.44	0.14	0.05	0.64	0.11	0.05	0.001	0.2	0.23	0.54
hsa-miR-570-3p	0.79	5.01	2.22	6.25	1.58	3.17	0.78	0.49	1.36	2.81	1.37	1.98	0.99	1.56	1.9	3.19	1.31	2.53	3.01	10.69	2.61	10.69	3.38	6.34	2.3	9.56	2.34	17.22	2.03	1.09	0.38	0.66	1.62	2.13	2.87	1.4	1.36	1.45	4.78	5.23	1.14	1.57	2.17	1.96	0.36	1.26	0.59	1.87	4.31
hsa-miR-574-3p	304.14	494.21	766.12	359.07	524.12	947.46	724.03	802.12	344.15	1139.22	1093.02	1471.9	774	824.2	731.84	916.01	381.62	574.25	1033.02	1025	760.62	794.68	504.73	573.23	618.66	836.42	823.08	548.62	1174.48	98.8	209.63	300.27	769.42	636.68	886.8	166.55	375.09	613.96	547.99	573.38	322.08	1748.39	1023.47	888.95	828.99	818.19	456.31	778.42	782.22
hsa-miR-574-5p	85.3	200.02	69.79	252.4	106.27	211.5	36.48	146.68	32.58	376.03	78.74	228.03	82.49	124.02	51.52	227.2	65.47	85.47	173.6	94.32	129.89	206.22	59.78	259.43	97.17	156.88	88.71	95.91	117.66	275.55	37.25	99.37	237.65	348.05	130.13	182.55	102.14	95.16	195.99	357.17	85.04	49.17	252.03	1208.43	33.1	138.61	54.83	243.11	25.86
hsa-miR-576-3p	2	2.6	2.02	4.02	1.05	0.51	0.78	0.44	0.47	0.88	1.18	0.23	0.45	0.52	0.71	0.97	1.07	2.39	1.51	1.77	0.83	0.76	0.76	0.61	0.41	0.89	1.37	1.38	1.42	1.42	0.29	0.14	1.09	0.62	1.95	0.93	1.18	0.48	1.44	1.06	0.64	0.74	2.05	0.37	0.86	0.88	0.59	0.42	1.27
hsa-miR-576-5p	15.56	75.53	27.73	26.19	12.08	30.35	26.75	19.23	43.37	30.44	39.2	29.66	40.47	75.71	13.63	69.27	42.95	59.49	25.35	77.9	21.79	27.68	30.46	12.69	8.19	51.75	26.45	20.95	20.21	4.22	15.44	11.32	15.04	16.37	51.74	10.84	18.57	20.69	42.68	11.43	15.35	51.71	46.18	20.2	16.44	34.44	12.77	24.45	19.59
hsa-miR-579-3p	0.84	7.47	1.14	1	1.1	1.77	0.48	0.71	0.41	2.03	0.59	1.13	0.4	1.23	0.71	2.03	0.28	1.85	1.46	2.53	0.43	1.97	0.82	1.41	0.69	3.28	0.49	2.39	0.76	0.62	0.29	0.61	0.79	1.04	0.97	0.7	0.68	2.95	1.84	4.4	0.87	0.65	1.11	1.01	0.81	0.7	0.49	1.54	0.64
hsa-miR-579-5p	1.3	12.63	2.64	3.65	2.44	3.46	1.74	2.47	3.24	7.69	2.7	4.06	2.83	4.49	1.76	8.17	2.19	1.63	2.7	4.3	2.04	2.68	1.53	4.23	1.43	7.88	2.54	3.05	2.17	1.04	0.62	3.24	2.01	2.03	2.01	1.91	1.86	7.66	1.44	4.4	1.23	2.31	2.75	1.59	1.76	2.56	2.12	2.1	2.6
hsa-miR-582-3p	0.93	0.28	0.36	0.05	0.81	0.23	0.24	0.66	0.41	0.78	0.54	0.14	0.001	0.33	0.24	0.23	0.37	0.36	0.35	0.8	0.43	0.67	0.49	1.93	0.6	1.42	0.44	3.39	0.8	1.8	0.58	0.14	0.39	1.14	0.63	0.84	0.36	0.66	0.58	0.09	1	0.001	0.53	1.22	0.45	1.12	0.25	0.28	0.73
hsa-miR-582-5p	33.59	43.89	35.59	10.77	38.44	36.6	24.22	124.21	76.95	91.38	31.79	31.2	37.25	113.62	29.82	27.15	19.44	12.24	49.64	74.18	47.27	56.62	74.19	169.04	74.07	297.92	28.45	209.42	59.96	172.68	41.18	88.47	45.05	65.57	42.23	73.83	30.8	90.67	35.71	5.6	87.64	6.28	32.81	78.95	61.01	479.56	41.12	61.05	69.65
hsa-miR-584-5p	14.03	12.44	22.76	7.48	15.72	10.88	9.32	7.31	9.19	10.55	16.63	14.29	12.81	34.83	8.31	32.79	17.35	15.54	22.34	47.6	26.09	8.63	16.21	70.38	30	10.27	17.18	6.82	35.27	12.31	11.55	6.06	24.88	16.61	22.06	22.8	26.18	25.53	11.35	7.27	22.15	19.34	17.34	30.65	21.68	14.08	21.55	18.14	9.5
hsa-miR-585-3p	1.35	1.37	2.43	0.18	0.58	0.37	0.001	0.22	0.41	0.32	0.05	0.32	0.89	1.8	0.001	1.85	0.28	1.67	0.66	2.75	0.17	0.36	0.76	0.75	0.87	0.35	0.2	0.43	1.46	1.56	0.72	8.45	0.61	0.71	0.23	1.16	0.95	1.72	0.12	0.32	0.64	0.23	0.23	0.21	1.08	2.05	1.58	1.64	0.98
hsa-miR-589-3p	0.37	6.86	1.45	0.91	1.05	2.71	0.78	3.08	0.71	2.86	0.69	2.39	0.7	2.22	0.43	2.36	0.75	1.63	0.89	3.99	1.48	9.53	1.2	2.82	1.24	3.19	1.17	1.81	1.51	2.84	0.48	5.4	1.53	1.18	1.2	1.35	1.49	5.63	0.75	1.8	0.64	0.65	1.64	2.17	0.77	3.58	0.84	1.45	1.03
hsa-miR-589-5p	7.9	38.59	8.69	19.85	9.4	20.5	7.21	36.86	9.01	27.36	7.41	22.81	6.8	26.84	6.7	36.62	4.66	10.89	4.83	36.02	8.26	65.47	11.35	28.33	14.08	36.96	9.76	18.37	6.66	27.28	4.94	49.03	9.67	16.89	8.42	16.56	7.7	40.01	6.85	15.87	11.69	13.76	9.9	21.58	9.17	44.53	9.07	11.59	11.51
hsa-miR-590-3p	68.58	239.7	86.76	112.65	110.78	159.12	60.59	71.64	144.77	157.52	195.78	117.67	101.95	162.91	70.33	145.65	75.91	116.64	106.9	261.13	136.23	105.1	70.97	54.97	32.71	192.78	92.22	88.37	102.22	77.96	56.09	105.66	74.26	70.96	116.09	72.16	139.24	151.19	100.61	76.5	81.89	114.96	99.09	100.06	75.29	139.17	63.45	115.97	113.69
hsa-miR-590-5p	4.04	9.84	4.04	3.47	2.68	3.5	1.44	1.65	3.54	4.51	2.7	1.76	2.09	2.5	1.61	3.14	1.82	7.72	3.46	8.96	1.39	3.31	5.68	6.44	2.71	9.83	2.1	5.53	6.47	3.13	1.15	0.89	3.19	3.64	4.76	3.02	1.36	1.98	8.7	7.27	3.38	3.05	6.15	5.89	2.08	6.74	2.22	3.27	4.9
hsa-miR-592	16.45	4.97	23.7	24.68	6.38	15.41	20.92	17.58	56.62	1.47	7.95	1.17	24.93	401.49	16.62	6.74	17.21	19.56	41.84	57.5	45.57	251.39	28.44	2.44	11.59	7.97	41.47	1.48	31.3	2.42	9.92	15.5	37.04	3.64	43.15	15.82	27.77	11.09	19.64	0.74	33.43	1.39	15	5.62	6.82	18.73	16.52	3.18	28.12
hsa-miR-598-3p	8.87	10.17	12.42	10.81	7.33	6.72	7.63	9.28	12.2	2.26	11.97	3.61	6.56	14.51	5.79	10.07	7.93	6.91	4.92	7.59	7.04	8.63	13.87	5.4	6.81	7.48	7.51	5.82	12.65	11.41	6.09	6.43	11.98	15.52	10.2	18.61	5.62	5.59	14.97	2.18	8.4	2.63	9.14	7.32	9.98	8.97	11.14	9.3	6.76
hsa-miR-6087	1.49	0.61	0.72	7.62	0.38	0.89	0.24	0.05	0.06	0.37	0.29	0.23	0.2	1.18	0.24	0.09	0.33	0.59	0.35	0.35	0.35	0.67	0.33	0.42	0.87	0.62	0.1	0.001	0.47	3.6	0.67	0.85	0.26	0.43	0.46	0.23	1.31	0.18	0.35	1.06	0.46	0.14	1.17	0.64	0.32	1.44	0.49	0.19	0.34
hsa-miR-616-3p	0.79	2.46	0.98	5.7	0.58	0.65	0.36	0.71	0.53	1.15	0.64	0.54	0.4	1.04	0.24	1.89	0.65	1.49	0.62	2.71	0.52	1.97	0.44	0.42	0.18	1.15	0.73	1	0.76	0.28	0.24	1.22	0.83	0.71	0.92	0.84	0.41	8.05	0.63	1.76	0.41	0.78	0.82	1.11	0.36	0.56	0.3	0.42	0.34
hsa-miR-616-5p	0.65	2.84	0.47	4.06	0.43	0.51	0.06	0.55	0.29	1.2	0.39	0.63	0.35	0.38	0.33	0.97	0.28	1.67	0.44	3.59	0.22	1.65	0.66	0.38	0.14	0.58	0.34	0.86	0.47	0.52	0.19	0.94	0.61	0.43	0.92	0.6	0.23	4.01	0.92	1.25	0.37	0.42	1.05	0.95	0.18	0.93	0.15	0.47	0.29
hsa-miR-618	4.65	10.74	6.05	4.93	2.06	2.19	1.92	0.27	2.06	4.38	4.86	21.82	2.88	1.65	4.56	18.61	1.87	4.52	2.61	4.57	4.22	3.13	2.84	2.35	0.001	0.13	5.71	16.84	4.3	0.38	0.62	0.28	2.8	2.37	9.34	1.16	4.62	27.42	7.72	7.27	5.48	10.71	8.91	11.61	4.15	4.18	3.65	9.16	1.81
hsa-miR-619-5p	0.65	0.61	0.21	0.14	0.43	1.35	0.54	0.33	0.12	0.37	0.2	0.32	0.35	0.57	0.38	1.02	0.84	0.81	0.58	0.4	0.52	0.09	0.16	0.52	0.6	0.71	0.29	0.19	0.33	0.52	1.97	0.09	0.35	0.24	0.4	0.14	0.32	0.09	0.46	1.67	0.41	0.65	0.29	0.8	0.36	0.42	0.49	0.42	0.34
hsa-miR-624-5p	8.36	34.86	14.02	26.19	8.1	6.07	6.55	7.09	11.55	12.57	11.87	6.63	4.42	9.78	9.59	18.43	4.2	8.45	10.1	14.91	10.35	14.18	9.06	7.47	8.05	6.77	6.78	7.54	8.03	4.03	7.09	8.59	7.3	6.34	7.05	5.26	11.82	10.96	13.42	8.84	11.14	20.68	9.9	9.07	13.19	6.88	3.8	3.83	10.58
hsa-miR-625-3p	1.44	2.03	1.91	1.6	1.39	0.7	0.54	2.75	1.3	0.92	1.08	0.18	0.84	3.31	0.62	0.51	0.89	1.04	1.24	1.64	0.87	1.39	3.33	6.62	2.62	3.36	0.88	0.19	2.88	15.87	0.81	1.22	2.23	0.57	0.97	3.4	0.82	0.4	1.21	0.88	1.87	0.05	2.23	0.64	1.4	2.09	0.69	1.36	1.91
hsa-miR-625-5p	42.42	38.69	42.89	28.93	31.49	28.11	31.8	151.24	28.34	29.98	26.39	8.07	27.56	57.28	21.89	19.26	27.19	46.3	42.63	81.85	46.18	40.21	39.2	77.43	23.33	46.7	27.37	7.06	76.68	432.04	27.23	55.74	43.6	25.97	44.12	92.63	36.1	29.09	28.57	11.01	80.61	9.88	60.77	36.32	65.62	57.5	46.1	35.71	32.43
hsa-miR-627-5p	2.18	5.82	2.54	2.28	0.58	0.42	0.36	0.71	0.65	0.41	0.59	0.63	0.55	1.7	0.85	2.26	0.75	1.85	1.55	2.53	0.65	0.72	1.42	1.22	1.56	3.14	1.07	1.62	1.18	1.14	0.67	0.75	1.36	1.09	1.32	2.74	0.63	0.57	1.15	1.71	1.19	1.06	1.35	1.06	0.36	0.74	0.44	0.33	1.81
hsa-miR-628-3p	5.48	7.99	3.57	5.06	4.94	9.99	2.76	8.84	3.12	27.5	6.97	3.65	7.5	21.93	2.56	10.71	3.87	7.77	6.2	9.63	7.31	8.23	4.64	6.39	6.44	13.63	4.93	3.72	5.34	4.07	5.51	13.01	5.95	12.77	5.56	8.05	7.79	11	6.16	6.66	4.89	2.08	6.09	18.61	4.02	9.71	3.9	8.46	3.04
hsa-miR-628-5p	4.09	3.69	4.04	2.56	1.53	1.35	1.08	1.32	4.54	2.99	2.01	0.68	1.69	4.21	1.8	1.89	1.31	5.56	2.04	4.17	1.7	0.94	5.19	2.02	3.08	4.38	2.63	1.91	2.74	1.71	0.72	2.4	1.88	1.7	4.93	4.23	1.04	1.01	3.34	1.67	0.96	0.97	3.75	2.81	0.86	1.26	1.04	2.48	5.44
hsa-miR-629-3p	1.58	6.95	4.24	3.1	2.44	6.26	1.68	5.71	3.06	2.44	2.11	2.48	5.56	9.93	0.33	3.14	2.38	3.39	2.88	4.92	1.52	4.16	4.04	4.46	4.05	12.79	2.1	0.48	4.25	2.56	1.44	6.81	3.63	2.46	3.09	4.7	1.95	2.99	3.05	8.79	1.69	0.69	2.05	4.77	1.85	9.53	2.91	3.32	2.3
hsa-miR-629-5p	8.13	30.41	10.66	20.94	2.49	5.65	1.74	5.27	1.12	3.87	2.75	6.67	1.89	7.51	0.38	1.57	5.83	17.08	3.37	6.3	3.91	13.73	6.5	12.64	4.42	14.12	4.34	4.77	12.23	16.39	1.68	6.48	6.43	5.11	9.28	18.8	3.35	6.07	7.31	23.88	2.1	0.14	7.44	18.24	2.57	5.25	3.94	5.24	5.29
hsa-miR-641	1.72	6.76	1.97	1.73	1.87	4.02	0.48	0.88	0.88	5.94	2.85	1.89	0.89	2.27	1.8	2.12	1.45	6.55	3.41	3.64	2.3	2.42	0.66	1.74	0.83	4.21	1.85	4.2	1.32	1.09	0.77	0.8	1.66	1.32	2.12	1.16	2.22	1.01	1.44	9.86	1.74	1.85	3.52	3.39	2.21	1.39	0.49	2.2	2.4
hsa-miR-642a-5p	3.16	5.39	1.45	15.97	0.72	1.31	1.08	11.26	1.47	0.97	1.13	0.45	1.39	2.65	1.19	2.03	2.28	0.81	1.42	2.31	2.91	8.27	2.46	7.61	4.09	7.13	2.44	0.72	3.73	29.41	0.29	2.96	4.46	1.8	1.78	11.35	1.09	0.48	1.32	2.82	2.47	0.42	3.75	1.54	1.76	3.86	1.48	0.84	4.85
hsa-miR-643	0.6	1.94	0.57	0.41	0.72	0.84	0.42	0.44	0.71	0.69	0.44	0.45	0.55	1.42	0.33	1.15	0.28	0.36	0.62	1.15	0.52	0.85	1.31	1.41	0.74	2.92	0.59	0.72	0.66	0.47	0.48	0.66	0.26	0.62	0.52	0.51	0.91	0.92	0.63	0.65	0.46	0.69	0.59	0.69	0.23	1.53	0.35	0.7	0.73
hsa-miR-6500-3p	1.3	1.14	0.78	0.05	0.62	2.99	0.48	0.55	0.35	0.51	0.54	4.1	0.55	0.85	0.43	1.34	0.79	1.45	0.8	2.48	1.48	1.88	0.22	0.09	0.23	0.4	0.63	0.29	0.94	0.09	0.48	1.74	0.92	1.14	1.15	0.98	0.95	1.89	0.29	0.28	0.91	3.65	0.82	1.27	0.41	2.28	0.49	1.54	0.49
hsa-miR-6501-3p	0.7	0.33	0.67	0.68	0.72	0.33	0.54	0.44	0.47	0.51	0.98	0.41	1.04	0.28	0.85	0.69	0.37	0.09	1.15	2.4	1.39	0.001	0.22	0.14	0.87	1.02	1.56	0.29	1.32	0.19	0.48	0.19	0.87	0.71	0.63	0.74	0.77	0.26	0.4	0.09	0.41	0.55	1.05	0.37	1.04	0.33	0.59	0.56	1.52
hsa-miR-6501-5p	0.42	0.14	0.47	0.37	0.34	0.05	0.3	0.11	0.12	0.32	0.2	0.09	0.1	0.19	0.28	0.09	0.09	0.5	0.13	0.27	0.13	0.13	0.66	0.19	0.55	0.27	0.2	0.05	0.14	0.09	0.29	0.33	0.26	0.28	0.46	0.74	0.23	0.04	0.17	0.19	0.23	0.09	0.29	0.05	0.09	0.09	0.59	0.14	0.83
hsa-miR-6502-5p	0.33	0.14	0.57	0.05	0.43	0.09	0.3	0.16	1.24	0.18	0.29	0.09	0.3	0.8	0.28	0.14	0.28	0.23	1.06	0.22	0.52	0.001	0.49	0.09	0.51	0.27	0.63	0.05	0.57	0.33	0.24	0.28	0.17	0.24	0.57	1.35	0.27	0.001	0.35	0.001	0.64	0.09	0.41	0.11	0.63	0.14	0.3	0.09	0.1
hsa-miR-6503-5p	2.6	1.04	3.83	2.33	2.78	1.4	1.44	2.25	1.94	0.83	2.01	0.32	2.63	2.27	0.33	1.25	2.1	1.26	2.84	4.97	3.3	1.3	1.09	0.7	2.12	1.51	1.71	1.34	3.35	0.95	1.15	3.99	2.67	0.95	2.64	2.56	1.45	0.57	1.09	0.74	2.42	0.6	3.69	2.23	2.03	0.84	3.11	1.73	1.18
hsa-miR-651-5p	10.36	11.02	17.02	14.78	10.11	6.86	16.05	5.44	21.45	7.51	16.34	8.7	11.97	24.81	10.11	22.49	12.17	11.16	16.89	44.9	12.78	9.53	15.94	21.09	9.98	83.4	10.78	11.07	12.23	8.81	9.87	15.54	8.44	7.57	13.87	16	12.28	14.08	29.26	9.35	18.73	18.51	10.2	4.29	12.74	15.66	8.09	5.33	15.48
hsa-miR-6511a-3p	1.77	1.42	1.14	0.55	0.96	3.17	0.78	0.88	0.47	1.29	0.64	1.62	1.39	1.47	0.38	2.03	0.7	1.9	0.4	3.11	0.78	2.46	1.53	1.22	1.79	2.52	0.68	2.34	1.18	2.13	0.24	0.99	1.36	2.18	1.6	0.79	1	0.35	1.15	0.6	0.91	1.52	1	2.12	0.36	2.46	1.08	0.98	1.57
hsa-miR-6511b-3p	1.77	0.43	1.14	0.73	0.38	2.24	0.66	1.48	0.35	0.88	0.2	1.26	0.25	1.28	0.24	0.74	0.42	1.17	0.93	1.24	0.57	1.79	0.27	0.99	0.6	1.81	0.54	0.86	0.71	0.81	0.43	0.7	0.74	0.57	1.09	0.51	0.59	0.53	0.63	0.46	0.32	0.42	0.76	1.38	0.27	0.51	0.44	0.93	0.34
hsa-miR-6513-3p	0.37	1.32	0.67	0.5	1.29	0.7	0.72	0.38	0.88	0.88	1.37	0.77	0.7	0.95	0.28	0.97	0.19	0.9	1.15	1.06	1.52	2.1	0.87	1.22	0.87	1.28	0.59	0.48	1.46	1.04	0.58	0.52	0.79	0.99	0.69	0.28	1.13	0.7	0.63	0.42	0.87	1.02	0.47	1.43	1.4	2.05	0.74	0.93	0.83
hsa-miR-6513-5p	0.7	1.28	0.78	0.78	0.34	1.35	0.6	0.88	0.24	1.24	0.64	0.18	0.55	1.04	0.81	0.97	0.42	0.86	0.58	0.71	0.52	2.55	0.11	1.22	0.6	0.58	0.59	1.62	0.47	0.85	0.14	1.03	0.52	0.99	0.8	0.23	0.36	1.63	0.46	0.28	0.37	1.25	1.46	0.85	0.45	0.51	0.44	0.61	0.54
hsa-miR-6514-3p	0.28	0.28	0.36	0.32	0.38	1.03	0.36	0.38	0.47	0.92	0.39	0.36	0.5	0.61	0.47	0.55	0.23	0.81	0.58	1.02	0.13	1.7	0.66	0.38	0.51	1.33	0.29	0.33	0.66	0.05	0.14	0.75	0.57	0.62	0.86	0.23	0.72	1.01	0.35	0.42	0.27	0.83	0.76	0.74	0.32	0.7	0.3	0.75	0.24
hsa-miR-6514-5p	0.28	0.33	0.16	0.05	0.1	1.07	0.36	0.27	0.12	0.69	0.25	0.18	0.15	0.24	0.001	0.46	0.09	0.23	0.22	0.4	0.22	0.67	0.33	0.09	0.23	1.06	0.34	0.19	0.24	0.05	0.29	0.52	0.44	1.04	0.23	0.28	0.36	0.57	0.06	0.56	0.14	0.23	0.23	0.48	0.23	0.33	0.25	1.12	0.001
hsa-miR-6515-5p	0.46	0.19	0.31	0.23	0.001	0.33	0.06	0.11	0.06	0.14	0.29	0.14	0.15	0.14	0.24	0.23	0.19	0.41	0.53	0.22	0.3	0.89	0.27	0.14	0.28	0.001	0.44	0.81	0.33	0.19	0.05	0.14	0.31	0.33	0.34	0.33	0.27	0.04	0.23	0.14	0.09	0.001	0.23	0.42	0.09	0.05	0.05	0.14	0.39
hsa-miR-6516-5p	0.19	0.76	0.31	0.27	0.48	1.31	0.18	0.16	0.18	1.47	0.29	1.8	0.05	0.47	0.05	0.55	0.28	0.68	0.18	0.27	0.13	1.48	0.22	0.7	0.46	2.3	0.15	1.24	0.09	0.19	0.14	0.56	0.31	1.75	0.4	0.42	0.32	1.19	0.35	1.02	0.46	0.51	0.29	2.97	0.18	1.63	0.39	4.91	0.24
hsa-miR-652-3p	770.05	1558.64	918.43	941.61	798.21	1328.73	445.86	1830.57	539.36	1144.15	753.6	931.5	627.55	1432.66	390.9	1102.21	680.38	1395.15	691.19	2304.25	1055.44	3542.75	1105.16	1007.44	1160.99	3860.77	707.88	404.57	1035.1	1136.64	601.08	1812.41	790.15	894.52	700.57	1204.61	729.03	1516.97	274.2	1401.79	769.75	231.12	762.77	2569.51	897.73	2617.63	798.58	1466.11	980.85
hsa-miR-652-5p	0.51	2.08	0.72	1.05	0.43	1.59	0.3	1.76	1.06	1.61	0.25	0.18	0.3	1.13	0.09	0.18	0.14	1.45	0.18	0.71	0.09	3.62	0.87	2.58	0.87	1.77	0.2	1.05	0.24	5.59	0.53	1.83	0.26	0.47	0.23	3.54	0.45	0.44	0.4	2.73	0.32	0.05	0.47	0.74	0.63	2.56	0.39	1.31	0.78
hsa-miR-653-3p	0.33	1.04	0.05	0.64	0.24	0.14	0.06	1.32	0.29	0.28	0.05	0.05	0.1	0.57	0.09	0.32	0.19	0.45	0.18	0.84	0.17	0.67	0.16	1.83	0.28	1.06	0.29	0.29	0.33	0.09	0.1	0.52	0.13	0.05	0.29	0.28	0.05	0.04	0.29	0.05	0.05	0.05	0.001	1.33	0.23	0.51	0.49	0.37	0.34
hsa-miR-654-3p	5.99	3.93	14.95	1.92	18.22	110.7	6.07	2.09	7.42	0.55	11.18	0.77	4.17	6.81	5.08	5.4	3.03	3.88	10.1	12.07	18.79	1.3	7.86	1.17	6.49	1.2	4.78	1.24	12.04	1.89	6.9	3.38	6.74	77.49	8.14	8	7.07	0.44	11.81	7.36	10.92	2.86	11.19	2.97	8.99	6.46	8.58	7.15	6.71
hsa-miR-654-5p	4.09	6.67	12.73	1.83	46.35	381.5	5.65	2.86	4.3	1.47	8.09	1.04	4.37	12.67	1.61	5.03	3.54	1.9	2.3	6.03	13.26	2.33	4.53	1.88	5.34	2.66	3.51	1.81	4.15	0.99	3.36	6.2	3.98	160.57	3.38	14.61	2.99	0.57	1.73	10.23	4.43	1.66	4.04	6.47	3.97	5.53	9.71	16.64	4.31
hsa-miR-655-3p	5.67	3.17	7.86	1.78	10.93	74.7	3.85	0.66	6.25	0.64	1.42	0.09	1.09	3.83	1.23	0.83	0.89	2.12	1.42	1.24	2.09	0.63	2.73	1.46	1.66	0.49	1.02	1.38	1.61	1.42	1.53	1.36	1.31	23.04	1.83	10.89	1.04	0.04	2.76	7.17	2.51	0.42	1.88	1.22	1.35	1.26	4.73	3.23	3.53
hsa-miR-656-3p	10.45	10.45	14.18	1.69	20.76	161.73	5.17	2.47	7.95	1.11	7.16	0.45	3.43	9.07	7.65	5.91	7.18	6.73	5.89	9.54	19.39	2.77	5.3	1.74	6.58	1.9	6.2	2.29	6.8	1.71	2.73	4.09	7.78	107.25	9	26.56	4.3	0.44	14.97	21.06	6.21	0.92	8.26	5.83	4.11	4.23	14.69	12.34	14.4
hsa-miR-659-5p	0.28	0.24	0.1	0.32	0.05	0.09	0.001	0.001	0.12	0.05	0.15	0.09	0.001	0.05	0.05	0.05	0.19	0.09	0.001	0.13	0.001	0.04	0.001	0.14	0.09	0.18	0.1	0.1	0.09	0.19	0.001	0.14	0.22	0.001	0.11	0.05	0.18	0.18	0.17	0.09	0.001	0.001	0.12	0.11	0.001	0.001	0.001	0.14	0.15
hsa-miR-660-3p	1.95	1.47	2.28	1.14	1.1	0.79	0.84	0.71	1.24	0.74	0.83	0.95	0.55	0.76	0.71	0.97	0.42	4.83	0.84	1.73	0.96	3.4	1.58	1.17	0.87	1.46	0.49	1.53	1.37	2.51	0.34	1.03	0.87	1.14	1.72	1.91	0.54	1.58	1.5	2.22	1.28	1.85	1.23	1.01	0.81	1.53	0.69	1.26	0.98
hsa-miR-660-5p	384.7	611.94	315.08	822.26	274.72	355.63	170.16	159.59	255.89	358.15	280.01	461.78	166.41	478.48	158.79	625.54	253.71	1462.78	352.16	874.69	377.79	1382.38	247.78	225.98	407.81	1196.89	302.86	718.58	398.12	458.56	288.48	731.84	508.72	946.93	329.89	505.65	338.76	726.46	220.87	795.14	327.33	611.64	402.33	468.26	323.09	443.49	143.33	302.48	260.98
hsa-miR-663b	2.83	6.86	19.76	0.05	5.03	3.69	3.31	0.77	7.9	0.92	104.83	31.15	0.74	0.43	11.11	18.79	14.69	0.59	85.49	30.21	16.7	1.97	17.69	2.35	1.56	5.93	24.93	1.15	15.68	0.14	2.49	0.33	30	1.85	13.92	0.98	1.86	36.14	7.6	0.69	4.48	67.96	73.07	0.48	9.26	2.05	12.42	6.17	45.7
hsa-miR-664a-3p	68.99	49.05	56.81	25.73	28.86	28.85	38.29	26.42	45.13	29.89	25.26	22.09	26.02	29.35	22.6	13.44	37.77	66.63	60.1	46.85	20.31	118.87	31.22	37.73	26.91	25.41	36.64	50.82	28.42	98.99	23.54	45.65	45.61	49.3	43.55	40.8	73.7	52.25	78.67	17.68	63.21	33.15	31.29	30.81	26.96	39.7	43.83	42.07	35.86
hsa-miR-664b-3p	8.64	6.57	11.69	2.65	4.12	3.92	6.25	4.01	8.13	4.33	7.02	11.68	6.95	5.81	5.56	9.51	7.23	8.72	10.86	18.1	6.26	15.3	8.35	3.71	7.36	11.82	9.22	7.92	8.88	6.3	3.55	6.72	9.32	7.38	15.18	4.84	9.56	5.06	9.91	3.61	6.71	13.11	11.13	9.86	4.97	10.04	5.67	11.41	6.47
hsa-miR-668-3p	0.23	0.8	0.83	9.08	5.75	118.73	0.42	0.16	0.47	0.41	0.44	0.36	0.15	0.47	0.05	0.79	0.19	14.41	0.13	0.89	0.78	0.27	0.49	0.38	0.37	0.27	0.2	0.1	0.19	0.09	0.1	0.47	0.17	17.22	0.74	1.54	0.05	9.46	0.4	0.56	0.09	0.46	0.59	0.16	0.41	0.23	0.59	1.64	0.1
hsa-miR-671-3p	2.14	1.56	2.85	1.32	0.91	0.89	1.68	2.25	0.71	2.07	1.62	3.29	1.24	2.98	1.66	1.75	0.93	2.8	0.71	0.71	1.3	1.88	2.24	5.68	2.44	1.9	1.22	1.29	1.04	5.3	0.34	3.57	1.53	0.66	1.49	2.56	1.22	1.01	2.48	2.45	1.64	1.11	3.22	1.33	1.13	1.72	0.84	1.22	2.5
hsa-miR-671-5p	59.66	73.55	57.38	74.78	31.69	32.17	16.05	47.79	28.99	53.2	13.93	18.84	17.03	65.69	10.02	44.1	24.85	68.57	18.61	55.41	11.44	72.36	29.91	186.89	39.43	58.7	19.96	26.72	28.57	202.95	15.87	126.94	27.07	21.43	28.94	94.25	10.69	12.15	13.02	125.55	12.88	8.08	33.46	67.61	12.19	64.8	32.79	47.63	31.94
hsa-miR-6715a-3p	11.94	24.45	3.41	0.55	8.68	12.05	2.46	10.66	4.77	1.61	9.57	135.88	1.29	0.47	2.56	5.77	13.66	2.98	3.46	3.33	2.65	2.95	11.57	0.47	2.25	2.97	11.81	95.05	1.89	0.47	1.05	1.88	0.83	1.04	1.2	0.28	13.36	1.8	4.55	13.14	2.74	15.6	17.64	13.57	2.98	0.74	3.35	2.2	2.35
hsa-miR-6715b-3p	4.09	4.73	1.24	0.46	2.78	3.27	1.02	2.91	1.94	0.6	3.29	21.32	0.74	0.33	2.23	80.49	3.78	1.49	1.24	1.29	0.96	0.81	1.26	0.09	0.6	0.66	3.56	12.26	1.23	0.52	0.14	1.55	0.66	1.04	0.69	0.05	1.99	0.18	1.27	2.55	1.32	5.17	3.69	2.76	0.45	0.37	1.13	0.28	0.78
hsa-miR-6721-5p	0.09	0.38	0.001	0.05	0.14	0.51	0.06	0.05	0.001	0.46	0.25	0.23	0.15	0.14	0.05	0.23	0.09	0.18	0.31	0.09	0.43	1.07	0.05	0.09	0.05	0.09	0.1	0.001	0.05	0.001	0.001	0.09	0.17	0.43	0.23	0.05	0.14	0.18	0.001	0.32	0.001	0.05	0.001	0.53	0.09	0.42	0.15	0.23	0.05
hsa-miR-6724-5p	3.48	11.54	3.73	2.78	3.88	2.15	1.38	0.77	1.89	1.43	2.4	1.26	2.23	1.37	1.76	2.08	1.31	0.68	2.08	3.02	1.26	1.03	2.73	5.31	4.14	2.7	1.9	0.57	3.16	1.89	0.43	0.7	3.24	3.03	3.04	2.98	1.31	0.75	0.86	1.57	3.43	1.34	4.39	1.91	1.9	1.35	1.97	1.82	7.15
hsa-miR-6734-5p	0.28	0.14	0.1	0.23	0.05	0.09	0.001	0.16	0.06	0.23	0.05	0.05	0.05	0.09	0.19	0.09	0.05	0.36	0.18	0.13	0.17	0.13	0.11	0.19	0.09	0.001	0.15	0.001	0.09	0.24	0.001	0.09	0.13	0.09	0.23	0.28	0.09	0.13	0.12	0.23	0.09	0.001	0.23	0.11	0.05	0.14	0.15	0.05	0.05
hsa-miR-6737-3p	0.7	0.52	0.05	1	0.19	0.09	0.12	0.49	0.06	0.23	0.1	0.001	0.05	0.28	0.001	0.14	0.09	0.59	0.13	0.13	0.001	0.54	0.22	0.66	0.14	0.4	0.05	0.52	0.09	0.33	0.19	0.38	0.26	0.19	0.11	0.37	0.54	0.13	0.06	0.19	0.41	0.05	0.12	0.42	0.18	0.19	0.3	0.28	0.29
hsa-miR-6741-3p	0.14	0.43	0.16	0.14	0.14	0.28	0.001	0.27	0.24	0.88	0.25	0.36	0.001	0.38	0.09	0.18	0.05	0.5	0.09	0.22	0.04	0.67	0.11	0.19	0.32	0.62	0.2	0.14	0.09	0.14	0.001	0.14	0.22	0.14	0.23	0.19	0.001	0.09	0.001	0.05	0.001	0.18	0.18	0.32	0.001	0.09	0.05	0.14	0.1
hsa-miR-6747-3p	0.37	0.76	0.26	0.32	0.05	0.89	0.06	0.22	0.24	0.18	0.1	0.5	0.3	0.38	0.14	0.23	0.19	1.04	0.04	0.27	0.26	0.94	0.22	0.19	0.05	0.13	0.2	1.05	0.19	0.62	0.19	0.23	0.13	0.85	0.17	0.23	0.27	0.75	0.001	0.74	0.18	0.14	0.23	1.38	0.09	0.28	0.15	1.03	0.15
hsa-miR-6749-3p	0.93	1.7	2.85	1.6	0.96	0.79	1.02	0.6	0.29	0.83	0.59	0.99	0.45	1.28	0.71	0.88	0.84	1.26	0.93	0.4	0.91	1.07	1.15	1.74	0.83	1.33	0.78	1.67	0.61	1.33	0.29	0.89	1.18	0.57	0.86	1.54	0.54	1.72	0.4	2.59	0.23	0.83	0.94	1.01	0.23	0.7	1.13	0.7	2.55
hsa-miR-675-3p	94.08	67.78	383.94	14.01	94.48	19.75	70.44	12.47	70.59	2040.78	161.54	17.67	75.38	33.32	112.16	22.63	234.83	1009.77	126.13	125.2	167.41	7.92	49.35	28.8	128.91	41.26	195.41	6.82	100.66	12.5	54.12	30.67	63.28	600.11	232.82	30.24	126.69	467.52	303.63	295.11	55.17	17.91	141.1	416.19	104.05	6.46	111.48	39.59	205.09
hsa-miR-675-5p	40.98	33.11	123.65	15.19	20.18	5.46	16.77	5.77	6.66	1232.86	40.57	6.76	20.06	15.93	17.76	7.3	105.76	352.18	36.78	47.25	45.96	3.18	16.92	21.85	78.17	29.3	52.65	1.34	39.14	7.96	22.87	16.58	18.67	368.21	62.8	28.24	39.27	133.19	64.5	194.32	21.33	4.16	38.85	356.85	20.1	1.95	29.24	18.79	46.93
hsa-miR-6757-3p	0.33	0.28	0.52	0.05	0.48	0.7	0.48	0.11	0.29	0.74	0.49	0.41	0.45	0.52	0.28	0.6	0.47	0.27	0.66	1.2	0.78	0.58	0.49	0.42	0.55	0.35	0.54	0.38	0.66	0.14	0.14	1.08	0.13	0.57	0.63	0.09	0.54	0.7	0.52	0.09	0.41	0.78	0.64	0.58	0.81	0.88	0.59	0.33	0.24
hsa-miR-676-3p	1.77	1.84	1.76	3.42	1.29	1.68	0.84	0.99	1.89	1.11	2.8	0.32	1.74	4.54	1.76	2.72	1.73	1.22	2.35	4.97	4.87	2.24	1.26	2.07	1.79	28.64	2.2	0.48	3.87	0.33	2.35	3.01	3.11	1.85	2.18	0.79	1.81	13.73	1.38	8.56	2.47	0.74	2.11	4.93	4.47	4.42	1.08	3.37	3.77
hsa-miR-6761-5p	0.7	0.43	0.83	0.32	0.19	0.42	0.3	0.11	0.18	0.74	1.13	0.27	0.3	0.33	0.24	0.55	0.84	0.05	0.4	0.58	0.91	0.72	0.22	0.56	0.28	0.27	0.44	0.38	0.52	0.001	0.19	0.42	0.7	0.19	1.2	0.19	0.63	0.22	0.4	0.19	0.41	1.02	0.7	0.8	0.32	0.05	0.25	0.23	0.2
hsa-miR-6762-3p	0.28	0.43	0.1	0.18	0.05	0.14	0.12	0.33	0.06	0.78	0.001	0.001	0.1	0.57	0.09	0.32	0.05	0.23	0.09	0.04	0.09	0.31	0.001	0.23	0.09	0.18	0.1	0.1	0.05	0.19	0.19	0.52	0.26	0.09	0.001	0.09	0.09	0.13	0.001	0.23	0.14	0.05	0.06	0.21	0.14	0.23	0.001	0.09	0.05
hsa-miR-6766-3p	0.09	0.47	0.47	0.23	0.19	0.37	0.12	0.33	0.35	0.28	0.15	0.36	0.25	0.43	0.14	0.37	0.09	0.27	0.4	0.62	0.09	0.49	0.22	0.19	0.001	0.18	0.15	0.29	0.38	0.19	0.14	0.42	0.13	0.24	0.34	0.33	0.09	0.04	0.12	0.14	0.23	0.42	0.12	0.42	0.23	0.84	0.3	0.47	0.29
hsa-miR-6770-3p	0.37	0.47	0.21	0.09	0.29	1.63	0.36	0.6	0.35	0.64	0.29	0.95	0.45	0.47	0.28	0.32	0.28	0.68	0.58	0.62	0.26	0.89	0.11	0.52	0.37	0.62	0.1	0.38	0.42	0.24	0.14	0.38	0.57	0.33	0.46	0.6	0.5	0.04	0.06	0.14	0.41	0.6	0.18	0.85	0.54	0.37	0.3	0.65	0.29
hsa-miR-6770-5p	0.14	0.24	0.21	0.05	0.53	1.31	0.18	0.44	0.18	0.74	0.29	0.32	0.25	0.28	0.14	0.14	0.05	0.14	0.09	0.22	0.17	0.81	0.22	0.47	0.28	0.27	0.001	0.1	0.14	0.001	0.19	0.38	0.09	0.24	0.46	0.28	0.27	0.09	0.001	0.05	0.32	0.23	0.18	0.27	0.09	0.42	0.1	0.47	0.24
hsa-miR-6774-3p	0.46	0.33	0.41	0.73	0.34	0.56	1.08	0.71	0.53	0.46	0.64	0.23	0.4	0.8	0.14	0.65	0.28	0.23	0.35	0.98	0.65	0.18	1.58	0.33	0.78	1.95	0.39	0.67	0.71	0.14	0.48	0.8	0.79	0.8	0.63	1.4	0.63	0.66	0.52	0.32	0.41	0.32	1.05	0.8	0.77	0.51	0.35	0.51	0.73
hsa-miR-6777-3p	0.6	0.99	1.09	0.37	0.86	2.05	0.48	1.81	0.12	2.21	0.25	0.23	0.15	0.28	0.09	0.05	0.79	1.45	0.58	0.75	0.22	1.03	0.38	0.85	0.46	0.71	0.83	1	0.57	0.14	0.24	0.28	1.01	1.7	0.97	0.001	0.14	0.35	0.35	2.36	0.09	0.55	0.7	1.7	0.18	0.7	0.64	0.56	0.44
hsa-miR-6788-3p	0.37	0.9	0.16	0.37	0.24	0.75	0.24	0.44	0.18	0.32	0.34	2.52	0.35	0.9	0.14	1.34	0.47	2.21	0.35	1.38	0.43	0.89	0.05	0.19	0.14	0.8	0.39	0.48	0.47	0.05	0.29	0.47	0.44	0.33	0.69	0.19	0.05	0.001	0.23	0.14	0.001	0.09	0.82	1.06	0.18	0.79	0.2	0.79	0.34
hsa-miR-6803-3p	1.3	1.28	1.14	0.78	0.58	1.03	0.66	0.6	0.59	0.92	0.59	0.77	0.3	0.76	0.81	1.11	0.65	2.35	1.33	1.6	0.57	2.19	1.31	1.55	0.51	1.46	0.59	1.62	1.27	2.42	0.19	0.33	1.05	1.47	0.97	0.79	0.91	1.19	0.92	1.02	0.64	0.65	0.88	0.9	0.45	0.6	0.49	0.75	1.62
hsa-miR-6804-5p	0.05	0.19	0.05	0.14	0.29	0.23	0.001	0.22	0.06	0.23	0.29	0.09	0.15	0.19	0.05	0.09	0.09	0.23	0.09	0.4	0.13	0.45	0.001	0.23	0.09	0.04	0.29	0.24	0.001	0.14	0.05	0.09	0.09	0.24	0.34	0.33	0.27	0.18	0.12	0.09	0.001	0.09	0.06	0.53	0.05	0.28	0.1	0.23	0.15
hsa-miR-6810-3p	0.7	0.61	0.47	0.64	0.001	0.19	0.18	0.11	0.18	0.37	0.15	0.09	0.05	0.33	0.14	0.09	0.14	0.77	0.18	0.27	0.22	1.43	0.16	0.09	0.14	0.09	0.2	0.33	0.19	0.05	0.05	0.19	0.48	0.38	0.4	0.37	0.001	0.22	0.001	0.001	0.05	0.18	0.29	0.42	0.05	0.56	0.3	0.28	0.15
hsa-miR-6810-5p	0.14	0.43	0.36	0.68	0.05	0.19	0.24	0.38	0.12	0.6	0.44	0.09	0.45	0.19	0.09	0.32	0.28	0.18	0.4	0.18	0.43	1.21	0.05	0.23	0.18	0.27	0.73	0.33	0.42	0.09	0.001	0.47	0.13	0.76	0.34	0.05	0.41	0.35	0.12	0.09	0.18	0.28	0.23	0.48	0.18	1.12	0.39	0.37	0.15
hsa-miR-6815-5p	2.65	2.74	2.9	1.28	2.06	1.49	1.5	0.38	0.35	1.8	3.14	2.52	1.69	0.33	1.57	3.83	2.66	2.71	2.57	2.93	3.44	1.83	0.49	0.09	1.75	0.71	4.34	1.15	1.94	0.14	0.43	0.23	1.79	2.74	3.61	0.65	1.27	1.76	0.98	3.75	0.96	2.12	5.63	2.01	1.72	0.56	1.48	1.36	1.37
hsa-miR-6820-3p	0.93	0.99	0.52	0.91	0.05	0.37	0.24	0.22	0.24	0.32	0.2	0.32	0.1	0.33	0.62	0.55	0.14	0.41	0.35	0.31	0.13	0.89	0.38	0.94	0.41	0.58	0.29	1	0.19	0.76	0.29	0.61	0.26	0.66	0.4	0.28	0.77	2.02	0.17	0.69	0.23	0.18	0.64	1.27	0.32	0.37	0.15	0.19	0.49
hsa-miR-6821-5p	1.07	0.28	0.16	0.37	0.24	0.19	0.72	0.44	0.06	0.05	0.001	0.09	0.99	0.28	0.14	0.09	1.26	0.05	0.13	0.04	0.09	0.13	0.49	0.52	0.6	0.18	0.2	0.14	0.28	0.19	0.05	0.52	0.26	0.14	1.15	0.19	0.59	0.001	0.23	0.37	0.23	0.09	0.001	0.69	0.14	0.28	0.69	0.14	0.15
hsa-miR-6824-3p	0.05	0.85	0.47	0.64	0.29	0.75	0.18	0.93	0.12	1.98	0.25	1.22	0.3	0.61	0.001	0.46	0.001	0.72	0.18	0.67	0.13	1.57	0.27	0.99	0.18	0.4	0.05	1.19	0.19	0.47	0.1	0.89	0.09	0.14	0.23	0.7	0.32	0.13	0.06	0.51	0.18	0.18	0.06	1.91	0.23	2.46	0.05	0.7	0.15
hsa-miR-6842-3p	1.44	1.23	1.6	0.64	1.68	2.89	1.2	3.02	1.77	2.26	2.21	1.26	1.89	3.59	0.95	0.97	1.59	1.54	1.86	2.35	2.48	2.95	2.24	0.89	1.43	3.32	1.95	1.81	2.08	1.52	0.53	1.83	2.1	1.23	1.78	1.58	1.54	0.92	0.63	0.28	1	1.43	1.29	2.44	1.04	1.63	1.33	1.96	0.83
hsa-miR-6843-3p	0.46	0.61	1.19	0.41	0.62	0.42	0.78	0.05	0.24	0.41	1.42	1.13	0.94	0.57	0.85	0.74	1.03	0.81	1.24	1.82	2.26	2.15	0.38	0.001	0.23	0.66	1.41	0.29	0.9	0.05	0.19	0.33	1.62	1.42	1.2	0.001	0.77	1.32	0.58	0.14	0.32	0.65	1.11	1.43	0.32	0.14	0.54	0.79	0.2
hsa-miR-6851-3p	0.19	0.28	0.05	0.18	0.05	0.14	0.06	0.16	0.001	0.6	0.29	0.81	0.15	0.05	0.05	0.46	0.19	0.09	0.31	0.71	0.3	0.4	0.05	0.28	0.23	0.75	0.1	0.33	0.28	0.001	0.19	0.19	0.31	0.09	0.11	0.09	0.18	0.31	0.06	0.14	0.09	0.37	0.23	0.69	0.14	0.28	0.1	0.28	0.001
hsa-miR-6852-5p	0.33	0.95	0.72	0.001	0.14	0.79	0.24	0.33	0.06	0.69	0.54	0.54	0.25	0.19	0.24	0.09	0.23	0.23	0.27	0.62	0.43	0.54	0.55	0.23	0.37	0.27	0.73	0.38	0.28	0.09	0.1	0.09	0.22	0.43	0.29	0.47	0.45	0.26	0.17	0.37	0.41	0.65	0.23	1.27	0.05	0.23	0.35	0.56	0.44
hsa-miR-6853-3p	0.001	0.33	0.05	0.14	0.1	0.56	0.12	0.27	0.001	0.32	0.15	0.18	0.15	0.19	0.09	0.14	0.05	0.54	0.22	0.4	0.3	0.76	0.05	0.14	0.09	0.35	0.24	0.24	0.19	0.05	0.001	0.09	0.39	0.43	0.23	0.19	0.001	0.31	0.12	0.05	0.05	0.23	0.23	0.37	0.14	0.33	0.1	0.19	0.2
hsa-miR-6882-5p	0.19	0.52	0.001	0.18	0.05	0.14	0.06	0.001	0.24	0.32	0.15	0.32	0.25	0.24	0.14	0.09	0.09	0.36	0.18	0.13	0.17	0.31	0.11	0.23	0.28	0.18	0.05	0.24	0.14	0.05	0.14	0.28	0.09	0.24	0.17	0.19	0.05	0.22	0.29	0.23	0.18	0.18	0.12	0.27	0.09	0.23	0.15	0.23	0.24
hsa-miR-7-1-3p	28.29	48.29	42.22	30.34	36.24	41.13	36	34.12	68.82	37.54	49.25	77.05	59.59	100.67	38.51	112.22	39.5	41.83	61.74	98.27	51.88	57.11	61.52	47.31	65.28	134.26	49.52	57.35	67.9	20.18	25.74	36.25	58.56	30.7	40.17	51.27	46.16	34.16	62.03	66.22	69.1	57.71	48.99	34.41	68.1	71.17	47.09	32.67	58
hsa-miR-7-5p	164.01	405.06	191.74	320.2	196.34	644.17	182.96	414.49	478.02	369.58	161.79	309.18	268.91	884.98	108.41	674.91	240.52	328.1	197.66	438.81	166.76	822.36	315.74	502.38	268.91	1622.33	204.29	355.81	175.69	452.78	100.67	549.68	148.22	151.77	164.4	841.13	98.56	158.85	115.01	263.78	214.38	207.39	360.08	250.12	152.87	851.24	193.62	277.09	167.28
hsa-miR-708-5p	14.03	3.97	3.52	15.33	6.14	9.24	2.82	21.75	5.77	3.55	3.29	0.9	9.09	52.98	4.7	7.76	8.67	30.72	7.53	3.19	3.61	4.34	25.06	62.67	11.13	19.96	5.76	0.86	18.98	12.98	8.48	198.32	13.43	10.03	5.33	77.09	4.08	17.25	3.69	0.51	11.92	1.34	6.74	5.57	16.12	9.95	7.59	20.24	19.64
hsa-miR-744-3p	2.88	3.12	3.88	0.91	2.78	2.85	1.62	1.98	1.53	2.72	7.41	6.63	2.33	3.64	5.51	2.31	2.01	5.92	8.42	5.63	6.96	5.19	1.58	1.32	2.99	3.14	4.49	6.35	5.43	0.76	2.01	1.74	5.03	4.97	5.79	0.7	3.8	5.46	4.03	1.8	2.83	2.08	7.32	4.35	3.79	1.91	1.53	2.34	3.18
hsa-miR-744-5p	63.61	56.09	39.16	36.73	35.66	31.61	16.17	16.32	11.9	24.83	48.32	32.68	17.18	27.65	22.7	17.32	30.22	51.77	39.75	34.03	45.7	51.16	27.73	24.2	35.84	21.47	42.64	14.7	41.6	13.64	12.03	9.63	47.15	68.6	41.94	26.66	43.8	43.49	11.46	18.19	30.83	8.91	41.49	53.93	33.69	36.95	35.5	51.32	49.96
hsa-miR-758-3p	2.6	2.13	5.85	0.64	29.62	174.71	3.85	1.37	3.77	0.32	3.58	0.27	1.14	3.07	1.8	2.26	0.75	1.9	1.6	3.15	6.96	0.81	3.11	0.94	2.67	0.58	2.05	1.15	2.64	1.14	1.87	1.69	3.15	54.97	3.15	5.68	2.22	0.62	3.97	9.35	2.97	0.88	3.69	1.86	2.12	2.51	4.09	3.23	3.48
hsa-miR-760	1.77	7.61	2.17	4.75	1.92	10.08	0.42	1.43	0.41	8.06	0.59	1.58	0.79	3.83	0.57	1.52	0.37	3.93	0.62	7.41	0.83	5.01	1.09	2.16	1.66	3.9	0.98	0.81	1.46	1.28	0.19	3.52	0.87	2.13	1.09	2.19	0.91	3.17	0.29	6.25	0.37	1.29	1.29	6.79	0.5	3.35	1.68	2.38	0.98
hsa-miR-7641	0.51	0.43	0.93	0.73	0.48	0.7	0.78	1.7	0.12	0.6	0.69	0.77	1.99	0.52	0.95	1.52	0.42	0.27	0.58	2.57	0.74	0.45	0.55	1.64	13.99	0.49	0.29	0.14	1.84	0.19	0.62	0.99	1.01	0.9	0.46	1.21	2.13	0.22	2.42	0.14	0.41	0.88	2.34	2.12	0.59	0.98	2.02	0.84	0.93
hsa-miR-766-3p	33.87	43.61	21.37	34.68	17.54	16.25	10.7	18.18	14.91	10.87	9.08	2.52	19.07	22.73	4.8	17.59	12.87	33.47	10.64	31.59	7.61	100.67	21.07	7.71	17.71	26.16	12.88	6.92	16.34	10.8	7.67	26.49	13.08	25.78	17.13	25.96	7.29	48.2	10.83	14.99	13.7	5.36	16.47	17.82	5.51	35.65	15.73	29.64	15.04
hsa-miR-766-5p	0.65	1.14	0.93	0.64	0.1	0.33	0.54	0.22	0.41	0.14	0.39	0.05	0.3	0.28	0.19	0.46	0.37	0.45	0.75	0.8	0.39	1.07	0.22	0.09	1.2	1.02	0.39	0.19	0.85	0.66	0.19	0.19	0.83	1.28	0.57	0.7	0.36	2.24	0.4	0.32	0.87	0.42	0.64	0.42	0.54	0.84	0.44	0.51	0.29
hsa-miR-769-3p	7.99	13.95	11.02	8.81	6.71	14.71	6.07	20.11	1.83	17.23	4.86	7.48	6.8	26.04	4.51	13.07	5.13	17.21	5.67	7.5	6.78	19.01	4.64	18.56	6.44	32.27	9.03	12.17	6.14	15.39	2.97	17.52	6.39	11.92	5.44	10.37	5.66	8.45	2.65	10	6.67	10.76	6.39	19.35	4.88	13.94	4.88	21.46	5.34
hsa-miR-769-5p	18.82	22.94	16.92	21.99	11.31	14.85	8.9	24.01	11.31	18.61	11.23	13.03	10.18	24.48	7.22	15.38	7.23	23.72	11.21	16.68	8.26	12.61	9.01	25.65	8.28	33.38	7.71	13.5	15.11	45.04	6.81	18.31	11.11	19.68	12.72	19.96	12.14	10.78	9.85	20.82	14.25	16.11	13.71	20.89	10.52	21.99	10.5	35.95	12.54
hsa-miR-7704	17.66	6.53	65.08	9.44	18.69	3.31	28.43	22.14	2.71	12.25	109.05	4.82	12.12	2.17	32.29	1.06	9.65	0.95	46.22	12.24	26.57	0.54	12.56	8.6	8.83	0.8	48.26	0.76	31.73	9.33	3.45	3.9	18.28	3.03	45.73	5.49	39	0.62	13.53	11.2	24.98	9.37	56.61	8.64	30.85	5.11	13.95	4.07	91.94
hsa-miR-7705	2.18	3.22	2.12	1.78	2.78	4.3	2.28	5.71	6.66	3.96	2.31	6.9	4.67	6.66	0.85	2.31	2.1	2.3	1.24	4.61	1.83	7.65	3.66	4.32	2.71	7.3	2.2	4.39	2.93	4.12	1.01	2.91	1.75	2.13	2.52	4.88	1.27	1.98	2.07	1.02	3.2	3.32	3.16	4.14	1.72	7.53	3.94	4.35	2.25
hsa-miR-7706	1.72	10.55	4.55	2.87	3.26	13.12	1.86	2.53	1.36	10.55	2.21	3.74	1.89	5.86	0.71	3.83	2.28	8.4	3.81	4.26	2	3.71	2.4	3.43	1.56	9.87	2.34	5.34	3.82	0.95	0.24	3.62	1.84	8.42	3.21	0.93	1.99	3.87	0.35	7.27	1.05	2.12	3.46	10.5	0.68	1.35	3.06	14.26	1.32
hsa-miR-7854-3p	0.51	1.04	0.62	0.73	0.48	1.07	0.12	0.27	0.35	0.92	0.34	0.05	0.3	0.43	0.14	0.79	0.42	0.14	0.35	0.53	0.7	0.94	0.27	0.52	0.46	0.8	0.68	0.29	0.47	0.38	0.14	0.66	0.39	0.38	0.46	0.6	0.27	0.26	0.001	0.51	0.14	0.18	0.23	1.59	0.41	0.6	0.49	1.03	0.39
hsa-miR-7975	0.14	3.59	2.48	1.1	0.72	0.75	0.42	2.47	0.41	3.09	0.49	0.32	3.03	1.04	0.43	0.18	0.33	0.68	0.22	0.22	0.22	0.45	3.28	21.75	0.6	0.75	2.88	0.33	1.04	2.46	0.05	1.46	0.48	0.47	1.09	2	1.9	0.18	0.75	7.03	0.82	0.37	0.12	22.64	1.45	4.37	1.23	1.12	1.27
hsa-miR-7977	0.51	2.32	5.07	0.59	4.31	3.31	1.62	8.13	5.18	12.8	19.38	7.12	8.64	0.66	4.56	1.11	2.52	0.68	7.71	4.53	1.83	0.81	3.77	4.84	0.92	0.49	13.81	0.14	13.55	0.62	0.19	0.8	1.88	1.04	14.61	2.74	2.76	0.7	3.46	15.5	1.69	3.74	5.22	89.03	3.57	14.64	7.35	4.25	8.92
hsa-miR-874-3p	97.99	62.2	332.41	47.22	45.15	17.46	59.08	25.55	27.81	13.31	91.98	19.3	57.7	38.38	90.98	61.42	82.16	72.78	74.37	51.42	46.18	12.48	74.02	63.57	103.79	13.06	256.75	5.63	95.14	29.08	24.4	69.41	54.01	79.01	227.89	163.81	47.06	31.25	37.03	205.8	52.75	4.76	51.21	226.36	44.53	51.32	243.07	28.65	178.01
hsa-miR-874-5p	8.55	5.06	13.97	2.28	4.31	1.26	5.83	0.99	3.71	0.23	4.91	2.39	2.93	3.78	2.52	4.66	7.13	11.88	4.12	2.48	3.44	0.89	9.39	3.24	7.96	1.02	7.27	0.52	6.28	1.09	2.3	5.49	6.17	7.43	8.25	3.72	3.44	4.75	3.63	5.37	2.28	0.46	6.27	3.39	3.7	2.84	6.26	1.73	11.81
hsa-miR-877-3p	0.56	1.8	0.41	0.14	0.38	5.37	0.12	0.44	0.12	0.97	0.15	0.27	0.15	1.09	0.24	0.46	0.33	0.99	0.13	1.15	0.09	3.09	0.55	0.47	0.28	1.42	0.39	1.15	0.33	0.19	0.1	0.7	0.39	2.03	0.69	0.51	0.5	0.66	0.46	1.02	0.32	0.46	0.35	3.34	0.27	0.65	0.39	3.41	0.34
hsa-miR-877-5p	5.48	22.66	3.47	11.22	7.53	42.07	2.4	4.61	3.42	24.6	4.86	2.57	2.23	8.55	1.95	5.68	3.73	7.5	4.25	7.32	6.39	28.04	9.33	9.26	6.63	17.18	6.39	5.25	7.08	8.15	1.01	15.87	4.07	12.92	9.68	13.58	4.35	12.98	2.88	9.86	3.97	3.83	7.27	40.03	3.07	9.67	4.98	11.73	3.53
hsa-miR-885-3p	13.71	14.66	9.36	11.63	4.6	1.21	7.03	0.49	2.36	12.94	28.45	3.65	3.87	1.32	7.98	26.74	10.96	7.91	19.81	38.46	20.96	13.19	6.28	0.14	8.24	2.26	22.64	3.29	11.33	0.14	3.98	1.69	11.94	9.08	25.1	0.88	16.8	17.61	7.14	5.97	11.1	16.07	30.53	4.14	6.32	2.56	7.44	2.71	5.29
hsa-miR-885-5p	458.48	669.45	385.91	386.49	88.82	76.94	142.75	13.68	114.66	278.52	135.89	72.72	88.05	37.38	294.55	513.47	123.38	500.17	290.29	1593.75	146.63	1323.12	196.85	19.64	188.72	123.59	208.69	275.07	160.39	37.32	111.31	46.02	209.79	324.35	363.01	46.76	339.35	1409	432.52	617.57	239.82	206	286.43	172.06	69.64	81.53	121.88	207.31	200.54
hsa-miR-887-3p	33.45	26.91	15.16	15.88	14.76	13.03	7.69	13.02	12.9	55.13	5.45	5.32	10.53	13.8	3.85	10.76	5.41	24.48	3.59	18.59	5.04	3.31	21.62	5.64	13.16	9.74	3.32	3.1	9.4	10.8	7.14	61.42	6.47	5.49	6.65	33.26	9.69	6.43	5.3	8.33	10.5	2.95	6.91	18.19	7.72	16.55	19.48	28.7	23.37
hsa-miR-887-5p	0.14	0.14	0.16	0.05	0.24	0.42	0.18	0.33	0.18	0.32	0.05	0.09	0.1	0.05	0.24	0.28	0.09	1.81	0.22	0.13	0.09	0.13	0.16	0.09	0.37	0.001	0.1	0.001	0.33	0.05	0.05	0.47	0.04	0.09	0.11	0.19	0.05	0.001	0.06	0.28	0.27	0.001	0.06	0.16	0.05	0.05	0.39	0.56	0.15
hsa-miR-889-3p	7.53	10.74	12.47	2.01	59.63	709.58	7.87	3.35	19.74	3.59	11.14	0.63	5.81	13.61	3.89	3.37	5.41	4.74	3.37	7.5	15	3.8	7.7	3.29	7.87	2.66	5.51	3.1	5.1	6.58	4.65	7.51	5.73	170.69	6.99	28.56	5.12	0.35	13.19	40.63	7.58	1.99	7.21	7.05	4.92	8	15.23	20.61	5.63
hsa-miR-889-5p	0.28	0.05	0.47	0.14	0.67	10.69	0.18	0.001	0.53	0.09	0.2	0.001	0.25	0.38	0.09	0.32	0.14	0.09	0.13	0.22	0.96	0.09	0.16	0.001	0.92	0.13	0.2	0.1	0.09	0.05	0.43	0.23	0.13	2.84	0.11	0.98	0.18	0.09	0.12	0.32	0.32	0.05	0.06	0.05	0.23	0.19	0.15	0.28	0.15
hsa-miR-9-3p	2	3.12	4.19	114.2	1.77	1.73	2.89	1.26	6.89	5.43	3.58	4.55	1.79	2.98	1.28	4.06	2.1	145.14	3.1	16.24	2.96	3.62	9.5	3.85	4.23	10.8	3.32	2.19	3.73	1.75	1.2	2.58	2.27	2.55	6.7	8.37	1.86	153.74	5.93	1.67	3.2	8.59	9.14	1.06	4.02	6.69	4.88	7.25	6.61
hsa-miR-9-5p	11.43	23.03	35.7	1406.31	13.04	9.76	23.5	11.92	51.5	39.24	15.65	42.33	15.34	47.55	7.03	47.61	12.59	1270.79	20.56	296.71	15.13	13.37	76.75	52.9	55.3	135.32	12.54	6.25	47.36	12.12	4.79	30.81	13.12	14.81	39.65	53.41	10.1	1562.48	48.49	5.32	28.45	75.81	64.22	6.04	47.01	44.21	25.88	54.27	58.83
hsa-miR-92a-1-5p	5.9	5.82	9.05	4.47	2.49	1.68	2.04	1.1	1.94	1.29	3.68	2.93	1.29	1.37	1.14	8.59	3.78	3.84	2.61	4.17	3	0.54	1.69	3.1	2.85	5.09	3.12	1.81	1.65	1.42	1.15	0.33	4.42	3.31	5.62	1.95	1.18	3.74	2.13	12.73	2.56	3.97	17.52	1.38	1.45	1.12	0.79	2.57	4.85
hsa-miR-92a-3p	11255.1	15046.1	9353.66	40122.1	7807.71	9911.79	4958.78	5166.99	6192.33	8359.51	13229.4	25475	14601	10898.4	7642.88	19025.7	12317.2	17999.7	12861.8	12497.6	11519.8	4833.36	7795.55	10569.2	8573.92	27375.8	16189.3	7164.91	10896.7	7853.95	6944.75	4772.12	16927.7	31355.6	14120.8	5918.65	14103.5	9496.13	9922.07	55674.3	9329.87	13339	21301	32567.3	12612.6	9630.71	4970.97	22918.5	13163.7
hsa-miR-92b-3p	89.11	80.78	93.07	119.95	55.22	55.23	19.29	466.95	36.12	45.18	32.72	12.71	57.41	315.85	16.9	65.62	41.69	290.11	36.34	59.05	65.79	61.18	91.76	481.52	103.84	106.11	33.13	9.97	92.31	845.41	21.67	187.75	63.59	63.35	43.26	176.27	22.56	32.44	28.97	16.47	41.01	11.22	87.19	49.9	61.42	1030.8	73.12	124.71	58.24
hsa-miR-92b-5p	2.23	1.37	2.12	3.56	1.01	0.28	0.18	3.52	0.41	0.92	0.59	0.05	0.15	2.93	0.52	1.43	0.47	3.52	1.73	1.11	1.52	0.89	1.58	14	1.47	1.68	0.98	0.29	2.12	16.58	0.19	3.1	1.22	0.52	1.09	3.12	0.27	0.26	0.23	0.32	1.23	0.28	1.05	0.69	1.76	32.12	1.87	0.84	1.62
hsa-miR-93-3p	10.87	13.15	9.83	7.44	12.22	15.03	5.65	4.28	7.01	13.86	7.65	14.38	2.83	13.42	4.65	5.22	4.8	21.28	7.84	7.9	4.22	24.91	8.57	71.37	7.27	7.39	5.56	11.98	6.19	12.36	3.26	7.98	5.86	6.01	6.48	7.07	4.67	5.5	6.97	5.46	5.62	7.2	10.14	6.73	4.15	7.58	3.8	8.37	7.79
hsa-miR-93-5p	853.21	2437	762.45	1123.98	990.24	1899.6	558.38	921.11	903.36	3441.25	752.62	1990.17	574.32	2251.57	611.89	1273.03	740.02	2849.85	676.75	1352.54	812.58	5193.91	840.45	8149.69	669.08	2124.98	862.17	2756.8	648.36	1332.82	552.52	2068.11	863.97	1383.41	692.2	1235.64	902.83	1954.96	996.87	2601.35	743.9	1137.45	1162.35	3209.67	526.68	1148.96	739.16	1687.02	617.93
hsa-miR-935	2.37	2.55	1.5	11.54	1.68	2.89	0.9	1.76	1.47	1.61	1.62	1.08	1.84	3.54	0.95	3.6	1.26	7.23	2.22	5.41	1.35	5.19	2.29	0.19	3.68	3.63	1.17	0.24	4.53	179.36	0.43	0.94	2.89	2.74	1.43	2.56	0.63	5.99	1.61	0.83	0.91	1.43	2.11	4.72	3.57	1.44	1.92	2.1	4.21
hsa-miR-939-5p	0.09	0.66	0.1	0.55	0.1	0.23	0.12	0.27	0.24	0.69	0.29	0.23	0.05	0.05	0.19	0.001	0.33	0.23	0.13	0.22	0.22	0.49	0.05	0.47	0.09	0.58	0.15	0.33	0.28	0.38	0.001	0.09	0.13	0.33	0.11	0.28	0.18	0.001	0.001	0.56	0.05	0.28	0.23	0.48	0.001	0.05	0.001	0.61	0.15
hsa-miR-940	14.77	8.84	14.64	10.81	8.82	18.12	7.87	8.52	4.18	31.78	2.4	4.01	6.21	16.02	3.8	7.99	4.24	13.64	7.09	6.12	4.04	19.19	9.23	18.42	11.18	13.28	5.9	4.58	8.22	16.77	1.01	4.98	5.73	5.39	9.68	13.12	2.13	1.94	2.53	10.41	3.88	4.11	12.36	17.6	2.94	14.13	9.86	12.9	9.01
hsa-miR-941	31.27	209.48	36.89	40.38	39.79	172.38	29.69	54.83	20.39	77.79	66.18	172.17	26.67	51.52	27.21	92.5	20.47	42.28	28.94	84.56	29.18	147.9	30.52	80.39	70.11	172.6	20	51.67	51.98	58.63	17.74	129.99	20.38	26.3	22.29	31.08	46.88	211.53	22.69	60.76	12.88	20.04	39.61	42.63	23.8	51.83	55.47	121.39	42.91
hsa-miR-942-3p	0.46	4.49	1.14	1.32	0.62	1.91	0.48	1.98	1.18	1.8	1.13	0.99	1.44	4.21	0.33	2.72	0.51	1.36	1.02	5.15	1.04	2.46	0.49	1.64	0.64	6.77	1.22	0.76	1.51	0.76	0.43	3.52	1.09	1.42	0.29	1.81	0.77	1.72	0.29	4.77	1.23	0.92	2.52	1.96	0.86	2.93	0.89	0.93	0.39
hsa-miR-942-5p	2.56	32.82	3.73	3.83	3.12	8.96	1.5	5.27	5.89	3.96	4.07	8.61	3.77	13.94	1.52	13.53	7.23	9.76	3.46	22.49	3.78	9.7	9.99	12.73	6.07	53.96	4.59	3.96	4.63	4.07	4.46	15.54	3.45	6.81	3.84	6.79	5.16	14.88	3.17	13.56	4.2	6.23	9.02	8.91	3.3	11.43	3.01	6.73	3.48
hsa-miR-943	0.14	0.09	0.05	0.05	0.05	0.56	0.06	0.05	0.12	0.92	0.001	0.36	0.2	0.28	0.05	0.18	0.19	0.18	0.04	0.58	0.09	0.67	0.11	0.001	0.001	0.84	0.15	0.19	0.09	0.09	0.05	0.19	0.001	0.38	0.23	0.001	0.14	0.18	0.06	0.14	0.001	0.28	0.18	0.74	0.09	0.33	0.1	0.33	0.2
hsa-miR-944	0.74	1.51	0.57	0.09	0.96	0.19	0.18	0.71	0.88	3.5	0.88	1.17	0.5	2.74	0.28	0.51	1.12	0.09	0.58	8.21	0.61	1.34	0.66	1.55	0.69	1.68	0.39	2.15	0.71	22.83	0.19	2.02	0.22	0.33	0.74	1.81	0.5	0.13	0.75	0.09	0.55	0.74	0.18	0.16	0.68	4.88	1.43	0.14	0.2
hsa-miR-95-3p	36.29	129.74	67.05	137.1	44.58	45.1	20.56	151.84	32.7	405.46	18.94	26.37	25.62	59.98	16.86	11.96	21.59	61.26	29.96	23.29	35.61	125.54	33.9	40.78	29.35	31.03	22.49	106.59	41.45	60.2	25.07	101.53	38.84	66.89	22.06	48.06	26.36	127.47	39.8	4.63	57.14	71.15	24.67	12.78	56.59	269.27	50.29	69.97	36.3
hsa-miR-96-5p	13.94	132.62	8.59	102.93	9.73	25.54	4.75	155.8	58.57	70.29	5.15	12.35	18.97	806.43	2.18	2.03	10.17	135.34	14.27	10.56	11	295.62	83.79	49.57	36.44	364.49	7.07	11.21	14.45	35.57	6.14	168.31	13.51	29.43	21.09	55.59	5.71	19.67	13.53	6.9	14.48	66.67	22.62	134.15	8.45	26.36	7.05	43.52	3.18
hsa-miR-98-3p	2	1.18	1.29	2.01	1.29	6.86	1.14	2.2	0.94	5.53	1.37	0.77	0.65	2.17	0.95	1.06	0.89	8.94	2.61	5.81	0.78	7.2	1.97	3.15	2.12	2.7	1.66	1.81	1.65	3.88	0.72	3.52	1.18	4.35	3.44	2.56	1.4	2.64	1.79	11.15	1.55	0.92	1.82	2.44	0.54	1.3	1.13	0.93	1.03
hsa-miR-98-5p	335.59	219.7	460.15	457.99	294.18	1276.62	274.56	717.19	328.07	1464.86	296.15	399.03	325.97	791.64	193.41	373.08	301.74	1235.69	339.92	1166.21	487.15	1558.09	323.11	365.47	323.8	605.57	428.2	216.48	357.99	498.15	236.28	781.62	330.59	1412.12	524.6	965.11	367.62	1235.63	264.64	2583.12	471.01	537.35	284.61	639.79	313.97	792.39	328.17	282.56	255.45
hsa-miR-99a-3p	103.05	18.26	121.12	5.16	63.75	6.68	54.52	9.12	47.49	5.39	107.92	75.29	42.41	26.33	101.57	96.93	66.21	13.73	87.17	34.6	102.53	8.9	28.66	7.75	27.42	32.09	91.34	28.06	71.96	6.3	46.07	20.01	108.5	43.1	95.81	24.47	90.45	33.5	94.45	11.8	72.62	71.01	133.02	17.5	82.74	15.06	39.2	10.61	91.06
hsa-miR-99a-5p	22006.7	7012.38	33902.9	1468.72	26781.3	4869.36	20616.7	3382.45	26013.2	6765.05	47842.2	42741.3	23573.6	16671.1	38227.3	45316.9	23519	6457.8	44658.3	27679.2	45162.3	5345.93	16464.1	4086.73	26670	42853.4	30599.1	17695.9	45523.1	2692.82	22122.8	19929.2	38636.6	19876.4	28979	13623.8	35667.7	21403.9	24791.8	4486.1	34066.4	37153.6	34135.8	14523.4	47641.5	10071.2	22079.8	9616.28	45138.2
hsa-miR-99b-3p	34.71	34.53	31.66	28.01	30.2	106.59	11.9	108.83	24.1	47.21	16.04	9.78	21.8	177.23	8.64	34.22	15.67	31.98	16.13	38.38	22.35	11.76	21.13	16.91	24.57	14.48	17.37	6.44	29.23	15.91	9.35	59.92	27.9	26.16	12.66	72.34	12.68	9.77	14.23	7.77	17.63	6.97	25.84	111.83	19.46	86.13	32.29	37.53	19.45
hsa-miR-99b-5p	1386.78	2170.44	2214.91	2161.18	2371.88	7360.6	966.02	5115.73	2184.7	2916.96	1876.01	908.87	1890.01	8033.85	1331.29	2665.75	1037.42	1974.06	1695.32	4215.52	2557.72	990.61	2271.78	1941.16	3539.19	2100.77	1225.87	416.88	3818.81	1149.95	745.61	5162.74	2282.05	2089.82	1105.12	3290.26	1163.5	910.36	1025.5	537.79	1446.89	747.93	1268.82	5399.1	2195.37	6989.52	2403.42	2720.6	2834.19
novel_mir1	349.25	2807.15	2965.61	2504.37	2877.06	245.91	3148.46	10474.4	1881.79	1622.06	3029.71	13.61	2736.86	26.09	11492.1	18.84	2076.8	453.32	634.6	17.92	93.66	78.13	3837.94	2791.58	94.5	25.76	3893.46	88.18	1086.94	915.13	54.26	152.11	403.62	228.41	11415.5	8064.09	1771.59	3.48	3480.44	15190.3	367.98	59.05	414.7	4848.07	425.7	244.31	7864.02	3780.42	8835.37
novel_mir144	16.26	14.71	30.89	4.06	20.56	24.09	30.89	11.98	13.14	20.91	29.29	19.7	17.18	13.8	18.66	14.78	20.05	24.44	29.74	41.35	24.74	17.17	13.1	0.94	16.06	7.61	25.37	15.46	18.18	1.52	21	12.02	16.36	26.87	30.43	9.03	32.7	36.14	17.85	3.19	17.95	54.43	29.12	15.48	12.96	4.56	13.71	15.05	16.31
novel_mir167	24.02	29.61	25.3	26.6	18.36	88.1	10.04	0.001	6.66	21.88	2.4	0.54	42.06	15.88	17.38	12.79	23.97	52.18	9.31	11.93	2.61	6.84	22.11	9.49	12.28	16.2	2.2	2.53	19.36	53.85	176.17	7.75	21.74	13.81	5.44	4.98	1.81	0.57	13.02	24.8	2.88	0.46	0.59	15.01	1.49	23.43	9.47	8.13	5.68
novel_mir193	3.3	0.52	2.43	0.55	1.82	0.001	4.15	0.001	2.3	0.001	1.57	0.54	0.001	0.001	1.14	0.55	1.54	0.001	0.53	0.001	2.48	0.54	1.04	0.001	0.6	0.001	3.17	0.67	0.001	0.001	0.81	0.001	1.79	0.85	3.78	1.02	2.17	0.001	2.02	0.001	0.69	0.55	3.87	0.001	0.99	0.001	1.23	0.001	3.97
novel_mir2	2.74	10.41	5.23	1.46	2.59	8.45	2.76	2.64	5.18	11.33	2.85	8.11	6.41	11.3	0.66	9.19	4.15	15	2.79	9.32	3	25	6.77	7.8	7.09	18.24	6.78	2.82	4.58	3.74	1.92	6.1	4.33	19.44	6.25	6.89	5.12	10.83	2.07	7.08	6.67	4.94	4.81	21.69	2.17	16.97	3.11	9.35	2.06
novel_mir247	7.11	10.78	3.41	4.7	6.18	23.62	3.55	4.28	3.65	4.24	4.27	8.66	8.74	11.11	3.7	8.96	7.32	9.62	6.91	7.94	9.83	10.06	6.28	4.7	17.48	29.57	4.93	14.17	9.11	6.87	22.43	19.16	7.74	7.71	4.87	13.26	9.01	8.54	2.3	7.03	5.53	2.54	4.75	17.87	8.76	9.11	6.75	8.65	6.86
novel_mir260	2.14	0.76	0.001	0.001	0.001	0.89	0.001	0.001	0.71	0.001	0.001	0.001	0.6	0.001	1.57	1.29	0.7	0.59	0.001	0.001	0.001	0.001	1.2	1.32	2.12	2.66	0.001	0.62	0.57	2.27	8.34	0.001	0.57	0.001	0.001	7.35	0.001	0.001	0.001	1.02	1.74	1.34	0.001	0.001	0.59	1.63	1.13	0.001	0.001
novel_mir261	27.32	17.03	13.45	68.99	21.24	40.85	10.04	22.8	10.02	77.19	59.6	60.32	28.6	36.01	20.09	9.05	19.49	12.29	24.07	50.35	45.79	13.24	7.04	76.77	8.97	11.77	26.93	30.73	12.32	21.74	11.46	13.38	22.83	21.9	24.93	34.94	22.56	52.69	19.24	60.39	30.46	8.54	17.29	19.25	22.76	6.37	11.29	15.14	21.36
novel_mir276	8.41	4.59	1.91	22.17	0.53	7.8	2.16	2.53	0.001	5.16	5.45	9.06	5.81	16.16	5.03	7.85	7.88	2.21	1.68	14.73	5.31	7.02	0.6	37.12	27.65	3.94	2	0.001	3.21	20.37	2.06	4.04	1.49	1.18	5.1	1.12	9.74	4.18	0.001	4.03	4.57	2.63	1.58	7.9	1.04	27.8	4.14	2.38	1.13
novel_mir288	23.04	0.61	2.43	2.05	0.001	76.43	0.001	2.75	0.59	1.98	0.001	0.001	0.55	43.01	0.47	1.66	0.001	6.73	0.001	3.42	0.001	4.92	4.91	45.34	2.16	6.99	0.001	0.001	0.99	71.37	48.27	1.6	0.96	8.94	0.63	8.93	1.77	0.48	0.001	8.7	5.21	0.001	0.59	3.5	1.31	19.48	0.79	26.46	0.001
novel_mir3	12.27	7.24	11.12	0.001	15.77	0.47	1.26	0.001	1.83	0.001	17.71	4.55	0.6	0.001	42.93	19.03	2.1	0.001	11.26	3.19	7.04	0.001	1.53	0.001	12.7	1.37	7.66	0.52	14.83	0.001	45.54	0.001	18.98	5.39	3.55	0.001	10.6	0.001	2.94	34.99	2.97	0.001	0.59	0.001	4.92	0.65	3.7	1.31	10.58
novel_mir313	15.43	22.56	12.42	19.66	12.03	24.93	1.44	0.001	13.61	7.78	9.66	9.65	2.14	4.77	8.59	20.13	10.82	31.62	9.26	22.58	16.35	6.44	18.56	10.57	21.49	16.11	4.24	4.39	10.91	42.77	4.03	2.21	71.9	7.47	8.88	22.47	2.54	1.63	11.75	36.51	1	8.96	9.26	4.19	10.7	8.97	23.47	16.03	38.55
novel_mir320	6.23	7.19	6.21	2.46	2.92	6.72	2.34	0.88	7.31	11.33	0.59	2.16	4.87	1.7	0.001	3.05	3.5	7.05	1.64	8.92	0.48	1.83	6.33	4.42	0.74	0.84	1.32	0.001	0.57	7.25	0.001	1.83	1.88	2.74	3.32	3.02	0.95	0.001	1.32	3.38	1.32	1.06	1	6.26	0.59	10.27	6.71	18.18	1.03
novel_mir323	0.93	0.001	1.09	0.82	0.67	0.001	0.6	0.71	1.59	0.46	1.67	0.95	1.39	0.71	0.001	0.65	0.7	0.95	0.49	0.67	0.83	0.001	0.001	0.001	0.001	0.001	0.98	0.001	0.71	0.001	0.001	0.001	1.01	0.001	0.001	1.49	0.5	0.001	0.001	0.001	0.55	0.001	0.001	0.001	0.72	0.001	0.79	0.56	1.42
novel_mir375	3.76	10.36	12.88	0.001	1.82	1.03	1.38	0.001	2.47	0.001	32.82	2.16	0.001	0.001	5.98	3.93	10.4	0.001	21.58	2.93	3.96	1.83	5.73	1.27	0.001	0.84	19.13	1.43	7.13	0.001	0.001	0.001	5.2	0.001	8.14	1.26	0.001	3.65	1.73	0.001	10.14	41.97	9.38	0.001	2.94	0.7	15.68	4.86	15.97
novel_mir378	0.001	0.52	1.81	0.73	0.96	0.001	0.72	0.001	0.001	0.46	2.65	0.001	1.19	0.001	1.23	0.001	0.47	0.001	0.93	0.001	0.43	0.001	0.87	0.85	0.001	0.001	1.22	0.001	0.99	0.57	0.001	0.001	0.001	0.001	0.001	0.001	1.18	0.001	0.001	0.65	0.64	0.001	0.76	0.001	0.45	0.001	0.89	0.001	3.28
novel_mir420	0.001	3.26	1.91	2.1	0.58	0.001	0.6	0.99	0.59	2.49	0.54	1.13	0.84	2.17	0.001	3.05	0.56	0.9	1.02	3.73	0.001	2.42	1.97	5.45	1.33	9.25	0.68	4.49	1.84	0.71	0.58	1.88	0.48	0.99	0.001	0.001	1.49	3.87	0.86	2.36	0.59	1.8	0.001	0.001	1.17	0.65	0.59	1.96	0.64
novel_mir465	0.88	0.76	0.72	0.001	1.63	1.77	0.001	0.001	0.94	0.001	1.03	1.04	1.34	7.8	0.85	0.46	0.79	0.001	1.15	0.001	1.17	0.001	2.29	0.89	0.001	0.001	2.29	0.001	3.73	1.28	2.68	0.001	2.19	1.37	1.89	1.72	0.72	0.001	1.61	0.001	2.47	0.001	1.88	6.47	1.45	0.001	1.23	0.75	2.6
novel_mir48	2.51	0.66	0.001	2.1	1.87	3.83	0.9	0.001	1	2.21	0.001	0.001	0.6	0.71	3.09	0.69	1.31	0.001	2.75	1.11	0.87	0.001	2.4	0.001	1.61	0.75	0.98	0.001	1.27	6.25	1.2	0.75	2.67	1.09	0.63	0.001	0.001	0.001	0.001	1.2	0.001	0.001	0.59	0.9	0.45	0.74	1.87	0.001	2.55
novel_mir480	4.23	0.52	5.28	5.2	8.63	63.03	0.001	0.001	0.001	19.34	2.65	1.4	0.84	4.35	4.51	6.97	3.64	0.001	4.3	8.92	2.91	0.45	0.55	0.61	14.17	16.42	0.63	0.001	6.66	27.61	1.34	5.26	4.55	2.65	1.03	0.001	1	0.001	0.001	1.39	0.001	2.49	3.46	0.53	3.57	21.15	2.86	0.001	1.71
novel_mir490	2.42	0.9	3.47	5.02	0.72	1.21	0.9	4.67	1.47	0.83	0.88	0.001	0.7	1.61	1.76	1.02	1.03	0.54	1.91	1.55	2.3	1.3	2.29	1.93	2.16	2.52	1.12	1.34	1.56	2.46	1.01	4.27	1.01	0.76	3.38	1.16	1.31	0.001	1.04	0.001	0.46	0.001	1.05	0.001	2.08	2.09	1.73	1.78	2.69
novel_mir507	10.59	3.74	1.86	0.001	3.64	0.65	1.08	0.001	0.88	0.64	0.64	0.54	0.001	0.001	4.61	0.74	0.001	0.54	0.62	2.4	0.78	0.001	2.02	1.32	0.83	0.58	0.001	0.001	1.61	1.37	0.001	0.001	3.15	0.99	0.001	0.98	0.72	0.001	0.001	3.89	0.96	0.001	0.001	0.001	1.49	1.16	0.59	0.98	1.91
novel_mir575	1.81	2.84	9.11	4.75	3.69	1.31	2.52	2.53	1.41	0.88	15.11	0.54	10.73	0.99	5.84	0.83	6.76	0.001	6.87	1.42	3.04	0.001	5.35	7.38	5.24	3.23	29.23	0.001	23.23	4.31	1.05	0.99	4.02	1.04	8.94	5.4	4.67	0.001	1.84	4.63	4.25	1.75	4.81	2.23	5.6	8.46	17.16	3.09	9.4
novel_mir594	9.8	5.91	5.38	10.31	4.22	0.89	2.89	2.25	4.01	3.64	4.91	7.35	1.64	5.34	3.13	5.63	2.84	7.32	5.19	2.4	5.17	0.63	7.92	5.87	11.27	19.48	2.78	50.24	3.26	4.17	13.28	5.35	6.56	3.97	1.6	10.47	7.29	12.59	1.27	2.36	1.64	1.85	3.05	4.24	2.26	0.93	4.54	3.23	11.41
novel_mir599	12.08	96.49	142.28	333.75	71.47	17.65	393.15	5262.63	114.42	1701.6	99.88	0.77	2983.38	17.44	926.48	0.79	59.22	70.38	11.61	5.15	3.48	9.17	214.15	173.27	7.45	1.11	112.52	2.77	25.12	22.35	2.25	91.67	25.63	20.15	435.43	571.48	60.7	0.57	143.87	257.9	12.38	3.51	7.03	4701.51	16.57	12.36	471.05	261.58	117.85
novel_mir6	2.93	0.001	2.17	0.001	0.81	0.001	0.66	0.001	2.65	0.001	10.5	0.54	3.72	0.001	3.28	15.05	2.28	0.001	3.19	0.001	3.57	0.001	0.001	0.001	1.61	0.001	6.05	0.001	1.98	0.001	1.77	0.001	2.27	0.001	1.66	0.001	5.12	0.001	1.73	0.001	4.25	0.001	1.76	0.001	2.75	0.001	1.53	0.001	3.38
novel_mir608	285.55	102.82	115.06	86.41	170.27	98.09	125.74	34.12	193.49	31.87	277.46	246.38	86.81	59.03	320.24	406.33	178.83	48.16	162.52	158.25	104.19	60.69	75.39	61.45	102.27	92.96	82.75	38.98	88.01	27.85	85.04	17.33	228.69	69.45	300.55	106.26	126.6	40.85	112.54	46.46	53.16	321.56	119.54	25.66	59.75	123.09	148.7	81.47	237.91
novel_mir611	9.25	11.92	29.9	2.78	38.64	491.96	15.09	4.72	24.92	2.63	16.83	1.04	17.78	18.53	8.83	8.31	9.7	5.83	9.04	22.45	21.96	2.91	15.78	2.72	12.05	2.7	12.88	1.67	17.19	2.18	5.94	5.68	9.88	116.85	21.14	21.17	5.71	0.001	15.32	12.22	12.15	4.48	14.47	15.38	10.7	15.85	29.78	21.5	17.05
novel_mir615	22.25	9.93	5.79	1.78	21.91	53.32	39.97	18.24	3.54	15.34	2.35	1.85	24.83	6.95	21.37	6.23	37.07	121.97	3.77	7.28	5.04	8.01	6.33	9.26	17.02	3.32	0.68	1.67	5.85	8.24	42.71	9.49	19.99	6.77	3.61	10.05	7.47	1.67	4.55	11.2	3.61	2.63	1.17	18.03	6.82	16.13	22.88	8.79	2.11
novel_mir635	1.49	0.001	0.72	0.001	0.96	0.001	0.001	0.001	0.59	0.001	0.74	0.001	1.89	0.001	0.001	0.001	0.7	0.001	0.58	0.001	0.001	0.001	0.001	0.001	0.83	0.001	1.12	0.001	1.79	0.47	0.001	0.001	0.92	0.001	0.69	0.47	0.77	0.001	0.001	0.97	0.001	0.74	0.001	0.53	0.001	0.001	1.38	0.001	1.03
novel_mir648	15.98	35.19	10.81	1.83	7.53	26.61	41.65	2.42	46.08	44.77	3.43	30.7	38.78	10.44	7.36	51.95	27.65	122.38	15.91	33.72	12.05	5.14	116.98	7	4.6	10.49	11.52	3.1	40.51	87.81	3.45	1.88	22.57	15.23	20.74	23.03	2.22	2.9	10.19	54.84	4.16	85.13	16.58	6.42	11.56	16.64	25.84	29.87	17.73
novel_mir69	14.68	15.66	6.47	258.24	4.03	15.5	3.01	2.86	1.53	29.66	10.6	1.04	4.42	2.46	7.31	1.57	4.66	2.48	6.87	3.99	3.57	3.22	6.93	7.89	5.84	2.57	6.2	1.1	9.49	31.5	3.36	1.55	3.94	1.8	9.4	0.88	5.12	0.92	1.73	6.99	6.58	1.43	12.25	6.2	3.84	4.69	5.57	2.2	33.5
novel_mir88	0.001	0.47	7.97	0.91	0.001	0.001	0.001	6.26	0.82	10.13	8.09	0.001	6.01	0.001	4.75	0.001	0.001	0.45	1.33	0.001	0.001	0.001	1.42	3.29	0.001	0.97	6.59	0.001	1.7	0.71	0.001	0.001	0.001	0.001	6.07	4.98	1.04	0.001	1.5	13.05	3.33	0.001	0.001	8.48	0.001	0.001	2.37	0.001	9.4
[truncated: 15 more columns]
