# Supplementary material for: Small RNA sequencing identified miR-3180 as a potential prognostic biomarker for Chinese hepatocellular carcinoma patients
Source: Front Genet. 2023 Mar 27;14:1102171. doi: 10.3389/fgene.2023.1102171 (PMC10083302; doi:10.3389/fgene.2023.1102171)
Supplement: Supplementary file 7 [file Table7.XLSX]

## Sheet: Sheet1
Column"Term" stands for the name of the pathway
Column "Count" stands for the count of the miRNA target genes directly associated with the listed pathway
Column "GeneRatio" stands for the Gene Ratio value of the pathway, it equals "Count/List Total"
Column "Pvalue" stands for the enrichment p-value of the pathway used Fisher exact test
Column "Gene" stands for the miRNA target genes associated with the pathway
Column "List Total" stands for the total number of the miRNA target genes matched to pathway database
Column "Fold Enrichment" stands for the overall enrichment score for the group based on the EASE scores of each term members
Column "Bonferroni" stands for the Bonferroni Šidák p-value of pathway
Column "Benjamini" stands for the adjusted p-value by using the linear step-up method of Benjamini and Hochberg
Column "FDR" stands for the false discovery rate of the term, using Benjamini & Hochberg (1995) method
Term	Count	GeneRatio	PValue	Genes	List Total	Fold Enrichment	Bonferroni	Benjamini	FDR
hsa04012:ErbB signaling pathway	38	0.880853	5.86117e-06	SHC4, CAMK2D, SHC3, SHC1, SRC, CAMK2A, ARAF, PIK3CD, TGFA, PIK3R1, CBL, ELK1, AREG, EGFR, CRKL, MAPK9, ERBB3, ERBB4, AKT2, AKT3, PLCG2, ABL1, EIF4EBP1, ABL2, MAP2K7, PAK2, STAT5A, STAT5B, PRKCB, EGF, PRKCA, NRG1, PTK2, EREG, GRB2, RAF1, SOS1, HBEGF	1783	2.04499	0.00200837	0.00201624	0.00182868
hsa04510:Focal adhesion	71	1.6458	1.33083e-05	ITGB1, MYLK2, FLT1, ITGB3, RASGRF1, TNC, PIK3CD, LAMC1, ELK1, MYLK3, MYLK, MYLK4, CRKL, CCND2, CCND1, AKT2, AKT3, TNR, ITGB8, ITGB6, PDGFRB, VAV3, PPP1R12A, VWF, PDPK1, PRKCB, ITGA3, HGF, ITGA2, PRKCA, VAV2, COL4A2, COL4A3, COL4A6, ITGA8, TLN2, RAF1, TLN1, SOS1, DOCK1, MET, BIRC2, BIRC3, SHC4, SHC3, SRC, SHC1, PDGFB, PIK3R1, THBS2, EGFR, RAP1B, MAPK9, RAP1A, PDGFD, CHAD, PIP5K1A, FLNB, PIP5K1B, P…	1783	1.6158	0.00455436	0.00228902	0.00207609
hsa05200:Pathways in cancer	153	3.54659	8.86609e-05	EPO, IL23R, ARAF, IL5RA, ETS1, ELK1, CRKL, EDNRB, CCND2, CCND1, TFG, CDH1, AKT2, AKT3, PIM2, PRKACA, PRKACB, IL13RA1, PDGFRB, IL4R, PRKCB, HGF, PRKCA, RUNX1, EML4, AR, COL4A2, MSH2, COL4A3, COL4A6, RAF1, IL6ST, NOTCH2, MAX, CTBP1, EPAS1, TCF7, PDGFB, TGFA, LPAR2, LPAR3, CSF2RB, PIK3R1, STK4, RASGRP1, RASGRP3, BCL2L11, TERT, TPR, ABL1, PLCG2, WNT2, FGF23, WNT3, IFNA21, STAT5A, GSTM4, SMAD2, WNT10B…	1783	1.31802	0.0299543	0.0101665	0.00922074
hsa05223:Non-small cell lung cancer	30	0.69541	0.000305405	ARAF, PIK3CD, TGFA, PIK3R1, STK4, EGFR, CCND1, KIF5C, AKT2, AKT3, E2F1, PLCG2, E2F2, BAK1, JAK3, STAT5A, STAT5B, PRKCB, EGF, PDPK1, HGF, PRKCA, GADD45G, EML4, CDK6, RARB, GRB2, RAF1, SOS1, MET	1783	1.90596	0.0994683	0.0237898	0.0215768
hsa04020:Calcium signaling pathway	76	1.76171	0.000377619	CHRM2, MYLK2, OXTR, FLT1, CHRM1, ATP2A2, HTR4, ADRA1A, MYLK3, RYR3, MYLK, MYLK4, CYSLTR1, GRM5, EDNRB, BDKRB2, NOS1, PRKACA, PRKACB, PDGFRB, LHCGR, PRKCB, HGF, MST1, TACR2, PRKCA, TACR1, PHKA2, TRDN, ITPKB, ITPKC, ASPH, CASQ2, VDAC1, MET, SLC25A4, PLCB2, CAMK2D, CAMK2A, CACNA1B, PDGFB, CXCR4, ITPR2, CACNA1D, ITPR3, ADCY1, EGFR, CACNA1I, PLN, ERBB3, TBXA2R, ERBB4, PDGFD, GNA11, PLCG2, PTK2B, FGF23…	1783	1.44853	0.121507	0.0237898	0.0215768
hsa04070:Phosphatidylinositol signaling system	37	0.857673	0.000414939	DGKG, CDS1, PI4K2B, MTMR1, MTMR3, DGKD, INPPL1, MTMR8, PIK3CD, ITPR2, ITPR3, PIK3R1, MTMR6, PIP4P2, INPP5F, INPP5D, INPP5E, PLCG2, PIP5K1A, PIP5K1B, PIP5K1C, IP6K2, PRKCB, PRKCA, OCRL, SYNJ2, DGKZ, INPP4A, ITPKB, ITPKC, PIKFYVE, CALM3, PLCD4, PLCB2, PI4K2A, DGKH, CDS2	1783	1.74484	0.132686	0.0237898	0.0215768
hsa05205:Proteoglycans in cancer	66	1.5299	0.000587899	ITGB1, ITGB3, ARAF, PIK3CD, ELK1, CCND1, CTSL, AKT2, AKT3, TIMP3, PRKACA, PRKACB, VAV3, PPP1R12A, PDPK1, PRKCB, HGF, ITGA2, PRKCA, ANK3, HSPG2, ANK1, VAV2, TIAM1, CTTN, RAF1, SOS1, MET, HBEGF, CAMK2D, SRC, SDC2, CAMK2A, WNT8B, TWIST1, ITPR2, ITPR3, PIK3R1, IQGAP1, CBL, EGFR, SLC9A1, ERBB3, ERBB4, GPC1, PLCG2, FLNB, WNT2, WNT3, EIF4B, SMAD2, WNT10B, TGFB2, FZD5, WNT7B, CAV1, FZD9, IGF2, IGF1, PTK2…	1783	1.47271	0.182667	0.028891	0.0262035
hsa05214:Glioma	30	0.69541	0.000681196	SHC4, CAMK2D, SHC3, SHC1, CAMK2A, PDGFB, ARAF, PIK3CD, TGFA, PIK3R1, EGFR, CCND1, AKT2, AKT3, E2F1, PLCG2, E2F2, BAK1, PDGFRB, PRKCB, EGF, PRKCA, IGF1, GADD45G, CDK6, MDM2, GRB2, CALM3, RAF1, SOS1	1783	1.82973	0.208424	0.0292914	0.0265667
hsa05220:Chronic myeloid leukemia	30	0.69541	0.000875348	SHC4, SHC3, SHC1, CTBP1, ARAF, PIK3CD, PIK3R1, CBL, CRKL, MECOM, CCND1, AKT2, AKT3, E2F1, ABL1, E2F2, BAK1, STAT5A, STAT5B, TGFB2, SMAD4, SMAD3, TGFBR2, RUNX1, GADD45G, CDK6, MDM2, GRB2, RAF1, SOS1	1783	1.80565	0.25946	0.0334577	0.0303454
hsa04935:Growth hormone synthesis, secretion and action	41	0.950394	0.00194567	SHC4, ATF2, SHC3, SHC1, IRS4, PIK3CD, ITPR2, CACNA1D, IRS2, ITPR3, ADCY1, PIK3R1, GNAI2, ADCY5, CRKL, GHR, GHRHR, MAPK9, GNA11, AKT2, AKT3, CREB3L2, PLCG2, PRKACA, PRKACB, STAT5A, GHSR, STAT5B, MAP3K1, PRKCB, STAT1, PRKCA, IGF1, PTK2, GNAS, GRB2, RAF1, SOS1, PLCB2, BCAR1, CREB5	1783	1.57602	0.487275	0.0669311	0.0607049
hsa04630:JAK-STAT signaling pathway	52	1.20538	0.0025886	CNTFR, EPO, IL23R, PIK3CD, IL5RA, PRL, GHR, CCND2, CCND1, AKT2, AKT3, LEPR, JAK3, IL13RA1, IL10, PIAS4, PDGFRB, IL4R, IL11RA, LIFR, OSMR, PRLR, IFNE, IFNK, RAF1, IL6ST, SOS1, STAM2, IRF9, IL9R, PDGFB, CSF2RB, PIK3R1, EGFR, IL21R, SOCS6, SOCS7, SOCS4, IFNA21, STAT5A, STAT5B, IL10RB, EGF, STAT1, IL10RA, LIF, OSM, IFNLR1, IL7, IL2RA, GRB2, IL7R	1783	1.4683	0.58895	0.0809525	0.073422
hsa01521:EGFR tyrosine kinase inhibitor resistance	29	0.67223	0.00379456	SHC4, SHC3, SHC1, SRC, PDGFB, ARAF, PIK3CD, TGFA, PIK3R1, EGFR, BCL2L11, ERBB3, AKT2, PDGFD, AKT3, PLCG2, EIF4EBP1, PDGFRB, PRKCB, EGF, HGF, PRKCA, NRG1, IGF1, GRB2, RAF1, SOS1, MET, FGFR3	1783	1.67918	0.728559	0.108778	0.0986587
hsa00562:Inositol phosphate metabolism	27	0.625869	0.00480131	PI4K2B, MTMR1, MTMR3, INPPL1, MTMR8, PIK3CD, MTMR6, INPP5F, INPP5D, INPP5E, PLCG2, PIP5K1A, PIP5K1B, PIP5K1C, OCRL, SYNJ2, FIG4, INPP4A, ITPKB, ITPKC, PIKFYVE, ALDH6A1, PLCH1, PLCH2, PLCD4, PLCB2, PI4K2A	1783	1.69187	0.808107	0.119414	0.108306
hsa04022:cGMP-PKG signaling pathway	52	1.20538	0.00514618	ATF2, MYLK2, GUCY1B1, PDE3B, IRS4, ATP2A2, IRS2, ADRA1A, MYLK3, MYLK, MYLK4, RGS2, EDNRB, AKT2, AKT3, CREB3L2, BDKRB2, GUCY1A1, PPP1R12A, TRPC6, ATP1B2, ADRA2C, ADRA2B, KCNU1, PDE5A, VDAC1, RAF1, SLC25A4, PLCB2, CNGB1, CREB5, ITPR2, CACNA1D, ITPR3, ADCY1, GNAI2, ADCY5, PLN, GNA11, GNA12, KCNMB3, MEF2D, INSR, PDE2A, ATP2B4, NFATC2, ATP2B3, ATP2B2, ATP2B1, SLC8A3, PDE3A, CALM3	1783	1.42434	0.829616	0.119414	0.108306
hsa04810:Regulation of actin cytoskeleton	65	1.50672	0.00520702	ITGB1, CHRM2, MYLK2, CHRM1, ITGB3, ARAF, PIK3CD, MYLK3, MYLK, MYLK4, CRKL, TMSB4X, BDKRB2, ITGB8, ITGB6, GIT1, PDGFRB, APC2, VAV3, ACTR3, PPP1R12A, ITGA3, ITGA2, F2, VAV2, ENAH, TIAM1, ITGA8, MYH9, ARHGEF4, RAF1, ARHGEF7, SOS1, DOCK1, ARHGEF6, SRC, PDGFB, CXCR4, LPAR2, PIK3R1, IQGAP1, IQGAP2, EGFR, SLC9A1, SCIN, PDGFD, GNA12, PIP5K1A, PIP5K1B, PIP5K1C, FGF23, MYH10, PAK2, EGF, LIMK2, GNG12, SSH2,…	1783	1.3639	0.833152	0.119414	0.108306
hsa04910:Insulin signaling pathway	44	1.01994	0.00571113	SHC4, PRKAA1, SHC3, PRKAA2, SHC1, PDE3B, IRS4, ARAF, INPPL1, PRKAG2, PIK3CD, IRS2, PIK3R1, SLC2A4, CBL, ELK1, HK2, PTPRF, HK1, CRKL, RPTOR, HK3, MAPK9, AKT2, AKT3, MKNK2, EIF4EBP1, PRKACA, PRKACB, SOCS4, PTPN1, PRKCI, PRKAB2, PKLR, PDPK1, INSR, TSC1, SORBS1, PHKA2, PPP1R3D, GRB2, CALM3, RAF1, SOS1	1783	1.46912	0.859779	0.122789	0.111367
hsa04520:Adherens junction	26	0.602689	0.0066443	SRC, TCF7, CTNND1, PTPRJ, IQGAP1, NLK, PTPRF, EGFR, CDH1, CTNNA1, CTNNA3, ACP1, PTPN1, SMAD4, YES1, SMAD3, INSR, CSNK2A2, LMO7, SORBS1, BAIAP2, TGFBR2, TJP1, SNAI1, MET, NECTIN1	1783	1.6751	0.898389	0.131677	0.119428
hsa05210:Colorectal cancer	30	0.69541	0.00727404	RALA, RALB, TCF7, ARAF, PIK3CD, TGFA, PIK3R1, AREG, EGFR, MAPK9, BCL2L11, CCND1, AKT2, AKT3, BAK1, SMAD2, APC2, TGFB2, SMAD4, SMAD3, DCC, EGF, AXIN1, TGFBR2, EREG, GADD45G, MSH2, GRB2, RAF1, SOS1	1783	1.59569	0.918252	0.131677	0.119428
hsa04010:MAPK signaling pathway	83	1.92397	0.00764906	ATF2, PTPRR, FLT1, RASGRF2, RASGRF1, ARAF, ELK1, AREG, CRKL, ELK4, RPS6KA3, MECOM, RPS6KA2, AKT2, AKT3, PRKACA, PRKACB, MAP3K4, PDGFRB, DUSP2, PRKCB, IL1R1, HGF, CACNA2D1, PLA2G4A, TRAF2, PRKCA, MAPK8IP2, TGFBR2, EREG, TNFRSF1A, PPM1B, RASA1, DDIT3, RAPGEF2, RAF1, SOS1, MET, MAX, CACNA1B, PDGFB, TGFA, CACNA1D, STK4, NLK, RASGRP1, EGFR, RASGRP3, RAP1B, CACNA1I, MAPK9, CACNG8, RAP1A, ERBB3, ERBB4, …	1783	1.29139	0.928189	0.131677	0.119428
hsa04611:Platelet activation	40	0.927214	0.00791613	ITGB1, MYLK2, GUCY1B1, SRC, ITGB3, PIK3CD, ITPR2, ITPR3, ADCY1, PIK3R1, RASGRP1, MYLK3, GNAI2, MYLK, ADCY5, MYLK4, RAP1B, RAP1A, TBXA2R, AKT2, AKT3, PLCG2, PRKACA, PRKACB, PRKCI, GUCY1A1, PPP1R12A, SYK, VWF, ITGA2, PLA2G4A, F2, VAMP8, COL1A1, FCGR2A, P2RX1, GNAS, TLN2, TLN1, PLCB2	1783	1.47558	0.934522	0.131677	0.119428
hsa04015:Rap1 signaling pathway	62	1.43718	0.0080384	ITGB1, FLT1, ITGB3, CTNND1, PIK3CD, SIPA1L2, CRKL, CDH1, AKT2, AKT3, MAGI1, PDGFRB, VAV3, PRKCI, PRKCB, HGF, MAGI3, MAGI2, PRKCA, VAV2, ENAH, TIAM1, RAPGEF2, PRKD2, TLN2, RAF1, TLN1, MET, RAPGEF6, PLCB2, RAPGEF3, RAPGEF4, RALA, RALB, RGS14, SRC, PDGFB, LPAR2, LPAR3, PIK3R1, ADCY1, EGFR, RASGRP3, GNAI2, ADCY5, RAP1B, PARD6B, RAP1A, PARD6A, CNR1, PDGFD, FGF23, EGF, INSR, VEGFC, IGF1, GRIN1, GNAS, C…	1783	1.35051	0.937232	0.131677	0.119428
hsa04928:Parathyroid hormone synthesis, secretion and action	35	0.811312	0.0091545	GCM1, ATF2, ARAF, ITPR2, ITPR3, ADCY1, EGFR, LRP6, GNAI2, ADCY5, SLC9A3R1, CYP27B1, MMP25, GNA11, GNA12, CREB3L2, PDE4B, SOST, PRKACA, FGF23, MEF2D, PRKACB, KL, EGR1, PRKCB, PRKCA, MAFB, MMP15, MMP17, TRPV5, GNAS, RAF1, PLCB2, HBEGF, CREB5	1783	1.51039	0.957338	0.142442	0.129192
hsa05225:Hepatocellular carcinoma	51	1.1822	0.00952373	ARAF, PIK3CD, ELK1, CCND1, AKT2, AKT3, ARID2, APC2, PRKCB, HGF, AXIN1, PRKCA, ARID1B, TGFBR2, RAF1, SOS1, MET, SHC4, SHC3, SHC1, TCF7, WNT8B, TGFA, PIK3R1, EGFR, LRP6, TERT, E2F1, PLCG2, E2F2, BAK1, WNT2, WNT3, GSTM4, SMAD2, GSTM3, WNT10B, GSTM2, TGFB2, SMAD4, SMAD3, FZD5, WNT7B, FZD9, IGF2, GADD45G, CDK6, GSTA4, GRB2, CSNK1A1L, GSTM5	1783	1.38863	0.962458	0.142442	0.129192
hsa05226:Gastric cancer	46	1.0663	0.0102025	SHC4, SHC3, SHC1, TCF7, ARAF, PIK3CD, WNT8B, PIK3R1, EGFR, LRP6, CCND1, TERT, CDH1, AKT2, AKT3, E2F1, CTNNA1, E2F2, CTNNA3, BAK1, FGF23, WNT2, WNT3, SMAD2, APC2, WNT10B, TGFB2, CDKN2B, SMAD4, SMAD3, FZD5, EGF, HGF, REG4, WNT7B, FZD9, AXIN1, TGFBR2, GADD45G, CDK2, RARB, GRB2, RAF1, SOS1, MET, CSNK1A1L	1783	1.4122	0.970324	0.146236	0.132633
hsa04024:cAMP signaling pathway	64	1.48354	0.0110436	GLP1R, CHRM2, OXTR, CHRM1, PDE3B, PIK3CD, ATP2A2, HTR4, GLI3, AKT2, AKT3, CREB3L2, PDE4B, CNGA2, PRKACA, PRKACB, VAV3, GHSR, ABCC4, LHCGR, PPP1R12A, EDN2, ATP1B2, VAV2, TIAM1, ACOX3, RAF1, PPARA, RAPGEF3, RAPGEF4, CNGB1, CREB5, HCN4, CAMK2D, ADCYAP1R1, GIPR, PTGER2, LHB, CAMK2A, CACNA1D, PIK3R1, ADCY1, SLC9A1, GNAI2, ADCY5, RAP1B, MAPK9, MC2R, RAP1A, PLN, GRIA4, GABBR2, GABBR1, HTR1D, ATP2B4, ATP…	1783	1.32469	0.977831	0.146483	0.132857
hsa04917:Prolactin signaling pathway	25	0.579509	0.0111184	SHC4, SHC3, SHC1, SRC, LHB, PIK3CD, PIK3R1, PRL, MAPK9, CCND2, CCND1, AKT2, AKT3, SOCS6, SOCS7, SOCS4, STAT5A, STAT5B, LHCGR, STAT1, PRLR, ESR2, GRB2, RAF1, SOS1	1783	1.63368	0.978398	0.146483	0.132857
hsa04360:Axon guidance	54	1.25174	0.0122193	ROBO2, ITGB1, NRP1, LRRC4, PIK3CD, BOC, PLXNC1, NEO1, EPHA5, EPHA6, TRPC6, UNC5B, PDPK1, TRPC4, DCC, EPHA8, UNC5C, PRKCA, UNC5D, ENAH, RASA1, RAF1, MET, CAMK2D, SEMA3D, SRC, CAMK2A, CXCR4, PIK3R1, NTN1, GNAI2, EFNB2, EFNB1, PARD6B, ABLIM1, EFNB3, PARD6A, ABL1, PLCG2, PLXNA2, PLXNA1, SLIT3, SRGAP2, PAK2, RYK, LIMK2, SEMA4C, NFATC2, SSH2, SSH3, PTK2, SSH1, PLXNB3, PLXNB1	1783	1.35721	0.985258	0.146483	0.132857
hsa04068:FoxO signaling pathway	41	0.950394	0.0122775	PRKAA1, PRKAA2, SETD7, IRS4, ARAF, AGAP2, PRKAG2, PIK3CD, IRS2, PIK3R1, SLC2A4, STK4, NLK, EGFR, MAPK9, BCL2L11, CCND2, CCND1, AKT2, AKT3, S1PR1, IL10, TGFB2, CDKN2B, SMAD4, PRKAB2, SMAD3, EGF, PDPK1, INSR, IGF1, CSNK1E, SOD2, TGFBR2, GADD45G, CDK2, MDM2, GRB2, RAF1, IL7R, SOS1	1783	1.43166	0.985553	0.146483	0.132857
hsa04912:GnRH signaling pathway	31	0.718591	0.0126858	CAMK2D, SRC, LHB, CAMK2A, ITPR2, CACNA1D, ITPR3, ADCY1, ELK1, EGFR, ADCY5, MAPK9, GNA11, PTK2B, MAP2K7, PRKACA, PRKACB, MAP3K4, MAP3K2, EGR1, MAP3K1, PRKCB, PLA2G4A, PRKCA, GNAS, GRB2, CALM3, RAF1, SOS1, PLCB2, HBEGF	1783	1.52477	0.987463	0.146483	0.132857
hsa04666:Fc gamma R-mediated phagocytosis	32	0.741771	0.0131458	NCF1, ASAP3, INPPL1, PIK3CD, ASAP1, ASAP2, PIK3R1, PLA2G6, CRKL, FCGR3A, SCIN, AKT2, INPP5D, AKT3, PLCG2, PIP5K1A, PIP5K1B, PIP5K1C, FCGR1A, VAV3, ACTR3, SYK, MYO10, PRKCB, LIMK2, PLA2G4A, PRKCA, VAV2, PTPRC, FCGR2A, RAF1, DOCK1	1783	1.50905	0.989315	0.146483	0.132857
hsa04934:Cushing syndrome	47	1.08948	0.0132005	ATF2, CAMK2D, KMT2A, TCF7, CAMK2A, KCNA4, WNT8B, ITPR2, CACNA1D, ITPR3, AHR, ADCY1, EGFR, GNAI2, ADCY5, RAP1B, CACNA1I, PDE11A, MC2R, RAP1A, CCND1, RBBP5, GNA11, CREB3L2, E2F1, E2F2, PDE8B, PRKACA, WNT2, PRKACB, WNT3, APC2, WNT10B, CDKN2B, FZD5, WNT7B, FZD9, AXIN1, MRAP, NCEH1, CDK6, ARMC5, CDK2, GNAS, AIPL1, PLCB2, CREB5	1783	1.38705	0.989516	0.146483	0.132857
hsa04072:Phospholipase D signaling pathway	45	1.04312	0.0146438	DGKG, SHC4, RALA, RALB, DGKD, SHC3, SHC1, PDGFB, LPAR2, PIK3CD, LPAR3, ADCY1, PIK3R1, AGPAT1, EGFR, ADCY5, GRM5, CYTH4, AKT2, PDGFD, AKT3, GNA12, CXCR2, PLCG2, PTK2B, PIP5K1A, PIP5K1B, PIP5K1C, PDGFRB, SYK, EGF, INSR, PLA2G4A, PRKCA, TSC1, F2, DGKZ, GNAS, GRB2, RAF1, SOS1, PLCB2, RAPGEF3, DGKH, RAPGEF4	1783	1.39084	0.993654	0.148032	0.134262
hsa04150:mTOR signaling pathway	47	1.08948	0.0148632	PRR5, PRKAA1, PRKAA2, PIK3CD, WNT8B, PIK3R1, LRP6, RPTOR, RPS6KA3, AKT2, RPS6KA2, AKT3, EIF4EBP1, ATP6V1H, RICTOR, SLC38A9, FNIP1, ATP6V1E1, FNIP2, WNT2, ATP6V1C1, WNT3, EIF4B, ATP6V1F, WNT10B, MIOS, FZD5, PRKCB, STRADA, PDPK1, WNT7B, INSR, FZD9, PRKCA, TSC1, IGF1, TNFRSF1A, SLC7A5, CLIP1, TBC1D7, GRB2, ULK1, LAMTOR1, RAF1, LPIN1, SOS1, LAMTOR3	1783	1.37816	0.994121	0.148032	0.134262
hsa04919:Thyroid hormone signaling pathway	38	0.880853	0.0152348	PFKFB2, NOTCH2, THRB, SRC, ITGB3, ATP2A2, PIK3CD, PIK3R1, MED16, MED12L, SLC9A1, MED14, PLN, MED13, CCND1, AKT2, AKT3, PLCG2, PRKACA, PRKACB, NCOA1, PRKCB, PDPK1, STAT1, DIO3, PRKCA, SLC16A10, ATP1B2, MED27, KAT2B, KAT2A, NCOR1, TBC1D4, MDM2, RAF1, PLCD4, PLCB2, PFKM	1783	1.43656	0.994835	0.148032	0.134262
hsa04750:Inflammatory mediator regulation of TRP channels	32	0.741771	0.0153109	CAMK2D, SRC, PTGER2, CAMK2A, PIK3CD, ITPR2, ITPR3, ADCY1, PIK3R1, PLA2G6, ADCY5, MAPK9, PLCG2, BDKRB2, TRPM8, ASIC2, PRKACA, PRKACB, ASIC1, PRKCH, PRKCB, IL1R1, TRPV2, PLA2G4A, PRKCA, IGF1, TRPV4, GNAS, F2RL1, PRKCQ, CALM3, PLCB2	1783	1.49365	0.99497	0.148032	0.134262
hsa05165:Human papillomavirus infection	90	2.08623	0.0154917	ITGB1, PATJ, MAML2, MAML1, ITGB3, TNC, PIK3CD, LAMC1, RBPJ, CASP8, CCND2, PPP2R1B, CCND1, AKT2, AKT3, CREB3L2, TNR, ITGB8, ITGB6, ATP6V1E1, PRKACA, PRKACB, MAGI1, PDGFRB, APC2, PRKCI, ATP6AP1, VWF, ITGA3, ITGA2, AXIN1, PPP2R5D, TSC1, HLA-A, TNFRSF1A, COL4A2, TRAF3, NFX1, COL4A3, COL4A6, ITGA8, MAML3, RAF1, SOS1, ATP6V0C, IRF9, CREB5, NOTCH2, TCF7, WNT8B, PIK3R1, THBS2, EGFR, SLC9A3R1, PARD6B, PAR…	1783	1.24377	0.995277	0.148032	0.134262
hsa05212:Pancreatic cancer	26	0.602689	0.0168624	RALA, RALB, ARAF, PIK3CD, TGFA, PIK3R1, EGFR, MAPK9, CCND1, AKT2, AKT3, E2F1, E2F2, BAK1, SMAD2, TGFB2, SMAD4, SMAD3, EGF, STAT1, TGFBR2, GADD45G, RAD51, CDK6, RAF1, ARHGEF6	1783	1.5649	0.997071	0.156775	0.142191
hsa05213:Endometrial cancer	21	0.486787	0.0182139	APC2, PDPK1, EGF, TCF7, ARAF, AXIN1, PIK3CD, PIK3R1, ELK1, EGFR, GADD45G, CCND1, CDH1, AKT2, AKT3, CTNNA1, GRB2, CTNNA3, BAK1, RAF1, SOS1	1783	1.65622	0.998173	0.164884	0.149546
hsa04144:Endocytosis	70	1.62262	0.0188857	WASHC4, ARF4, TFRC, ZFYVE9, WIPF1, CLTC, WIPF3, WASHC2C, EEA1, ZFYVE27, KIF5C, PSD3, GIT1, ACTR3, PRKCI, PDCD6IP, EPS15L1, HLA-A, ARAP1, ARFGAP3, EPN1, TGFBR2, RNF41, RUFY1, ACAP3, ZFYVE16, RABEP1, RAB35, CHMP3, CHMP7, STAM2, SRC, ASAP3, AGAP2, CXCR4, AGAP1, AGAP4, ASAP1, ASAP2, VPS26B, CBL, EGFR, SNX4, PARD6B, GRK3, PARD6A, CYTH4, CXCR2, PIP5K1A, PIP5K1B, PIP5K1C, EPS15, RAB11FIP3, RAB11FIP4, SN…	1783	1.2757	0.998555	0.166582	0.151086
hsa04213:Longevity regulating pathway - multiple species	22	0.509968	0.0194512	PRKAA1, PRKAB2, PRKAA2, CLPB, INSR, HSPA6, IRS4, PIK3CD, PRKAG2, IRS2, ADCY1, PIK3R1, IGF1, SOD2, ADCY5, RPTOR, AKT2, AKT3, EIF4EBP2, PRKACA, PRKACB, FOXA2	1783	1.62314	0.998814	0.167281	0.15172
hsa01100:Metabolic pathways	367	8.50719	0.0234091	PI4K2B, PANK2, AHCYL2, PGAP1, CERK, XYLT1, GBA2, GCSH, NDST1, C1GALT1C1, HYKK, LIPC, STS, SCP2, NDST4, CHAC1, DHRS4L2, ATP6V1E1, SEPHS1, MCCC2, PDHX, GSTK1, ST6GAL1, ST6GAL2, SDS, GLCE, ACSL6, ALG2, ALG3, UPB1, GBGT1, PISD, INPP4A, MTAP, MTHFD2, MTHFD2L, IDO2, ALG10B, PI4K2A, GNE, CDS1, MTMR1, GCDH, MTMR3, MTMR8, PLA2G3, ADH7, PLA2G6, GNS, PLA2G7, ADH5, MTMR6, ADH6, HSD11B1, CYP27B1, PTDSS2, CYP2…	1783	1.09082	0.999704	0.196408	0.178137
hsa04151:PI3K-Akt signaling pathway	94	2.17895	0.024836	ITGB1, CHRM2, YWHAE, ATF2, FLT1, CHRM1, EPO, ITGB3, TNC, PIK3CD, BRCA1, LAMC1, PRL, AREG, GHR, RPTOR, CCND2, PPP2R1B, CCND1, AKT2, AKT3, MYB, CREB3L2, TNR, ITGB8, ITGB6, JAK3, MAGI1, PDGFRB, HSP90AA1, IL4R, VWF, SYK, PDPK1, ITGA3, HGF, ITGA2, MAGI2, PPP2R5D, PRKCA, TSC1, OSMR, YWHAZ, PRLR, EREG, COL4A2, COL4A3, COL4A6, ITGA8, MTCP1, RAF1, SOS1, MET, CREB5, PHLPP2, PRKAA1, PRKAA2, PDGFB, LPAR2, TG…	1783	1.21465	0.999821	0.203419	0.184496
hsa04530:Tight junction	49	1.13584	0.0258139	ITGB1, PATJ, PRKAG2, F11R, AMOT, EPB41L4B, CLDN20, PPP2R1B, CCND1, CLDN23, PRKACA, SYNPO, PRKACB, RAB8B, MAGI1, ACTR3, PRKAB2, PRKCI, ARHGEF18, RUNX1, TIAM1, CLDN10, CTTN, CLDN8, CLDN18, MYH9, RAPGEF2, RAPGEF6, PRKAA1, PRKAA2, SRC, CACNA1D, CD1E, ARHGAP17, SLC9A3R1, MAPK9, PARD6B, RAP1A, PARD6A, MAP2K7, MYH10, JAM2, MAP3K1, TJAP1, TJP1, OCLN, PPP2R2C, DLG3, CRB3	1783	1.32628	0.999873	0.206512	0.187301
hsa04310:Wnt signaling pathway	49	1.13584	0.0285719	INVS, CTNND2, CCND2, SOX17, CCND1, RSPO2, SOST, PRKACA, PRKACB, RSPO4, APC2, PRKCB, FBXW11, CTNNBIP1, CSNK2A2, AXIN1, PRKCA, CSNK1E, SFRP1, SFRP2, DAAM2, ROR2, PLCB2, PPARD, CAMK2D, CTBP1, TCF7, CAMK2A, WNT8B, NLK, NKD2, LRP6, MAPK9, TBL1X, WNT2, WNT3, WNT10B, SMAD4, SMAD3, FZD5, RYK, WNT7B, FZD9, NFATC2, VANGL2, CCDC88C, NOTUM, CSNK1A1L, LGR4	1783	1.31848	0.999952	0.223381	0.202601
hsa01524:Platinum drug resistance	24	0.556328	0.0350526	GSTM4, TOP2A, GSTM3, GSTM2, ABCC2, APAF1, PDPK1, PIK3CD, BRCA1, PIK3R1, CASP8, ATP7B, MSH2, GSTA4, AKT2, ERCC1, AKT3, MDM2, FAS, BAK1, ATP7A, BIRC2, GSTM5, BIRC3	1783	1.50388	0.999995	0.263141	0.238663
hsa03013:Nucleocytoplasmic transport	33	0.764951	0.0352246	POM121, IPO11, RBM8A, NUP188, CSE1L, PHAX, NXT2, IPO4, NUP160, GLE1, PNN, IPO9, SUMO1, NUP42, TPR, KPNA6, NUP88, KPNA2, TNPO2, KPNA3, TNPO3, UPF1, NUP133, NUP155, NUP210, NCBP2, RANBP17, UPF3B, NUP93, DDX19A, NUP50, NUP98, NUP37	1783	1.39771	0.999995	0.263141	0.238663
hsa05100:Bacterial invasion of epithelial cells	25	0.579509	0.0359524	SHC4, ITGB1, SHC3, SHC1, SRC, CLTC, PIK3CD, PIK3R1, CBL, CRKL, CDH1, CTNNA1, CTNNA3, ACTR3, SEPTIN2, CAV1, SEPTIN6, PTK2, ARHGAP10, CTTN, ELMO2, ELMO3, DOCK1, MET, BCAR1	1783	1.48517	0.999996	0.263141	0.238663
hsa05033:Nicotine addiction	15	0.347705	0.038955	GABRB3, CHRNB2, GABRA2, GABRB2, GABRP, SLC32A1, GABRA4, CHRNA6, CACNA1B, GRIN1, GRIN2D, SLC17A6, SLC17A8, GABRE, GRIA4	1783	1.71537	0.999999	0.269766	0.244672
hsa04390:Hippo signaling pathway	45	1.04312	0.0392102	YWHAE, YAP1, CRB2, PATJ, WWC1, TCF7, WNT8B, AREG, SAV1, NKD2, AMOT, PARD6B, PARD6A, CCND2, PPP2R1B, CCND1, CDH1, CTNNA1, CTNNA3, CCN2, WNT2, WNT3, SMAD2, APC2, WNT10B, TGFB2, PRKCI, SMAD4, SMAD3, FZD5, FBXW11, WNT7B, FZD9, AXIN1, CSNK1E, GDF6, YWHAZ, TGFBR2, MOB1B, LATS2, DLG3, PPP2R2C, DLG5, BIRC2, BIRC3	1783	1.31111	0.999999	0.269766	0.244672
hsa05160:Hepatitis C	45	1.04312	0.0392102	YWHAE, CD81, ARAF, PIK3CD, PIK3R1, EGFR, CLDN20, CASP8, PPP2R1B, CCND1, AKT2, AKT3, CLDN23, E2F1, E2F2, RIPK1, BAK1, IFNA21, RSAD2, APAF1, EGF, STAT1, EIF2AK1, MX2, EIF2AK3, TRAF2, CFLAR, EIF2S1, YWHAZ, TNFRSF1A, CLDN10, OCLN, CDK6, PPP2R2C, OAS2, TRAF3, CLDN8, CDK2, CLDN18, FAS, GRB2, RAF1, PPARA, SOS1, IRF9	1783	1.31111	0.999999	0.269766	0.244672
hsa05168:Herpes simplex virus 1 infection	125	2.89754	0.0438359	ZNF177, ZNF571, ZFP30, ZNF606, ZNF605, AKT2, AKT3, ZSCAN32, ZNF846, ZNF85, ZNF845, ZNF568, HLA-DOA, HLA-DOB, ZNF440, ZNF561, ZNF682, ZNF560, ZNF680, ZFP69B, ZNF705A, TSC1, ZNF99, HLA-A, ZNF12, HCFC2, ZNF93, ZNF439, ZNF317, ZNF713, ZNF557, ZNF436, ZNF677, ZNF555, ZNF675, ZNF674, ZNF432, ZNF398, ZNF671, ZNF154, ZNF324B, PIK3R1, ZNF25, ZNF708, C5, ZNF707, ZNF823, EIF4EBP1, ZNF547, ZNF426, ZNF546, ZN…	1783	1.15513	1	0.282665	0.256371
hsa04925:Aldosterone synthesis and secretion	30	0.69541	0.044111	ATF2, CAMK2D, DAGLA, CAMK2A, ITPR2, CACNA1D, ITPR3, ADCY1, ADCY5, CACNA1I, MC2R, GNA11, CREB3L2, PRKACA, PRKACB, PRKCB, PDE2A, ATP2B4, ATP2B3, PRKCA, ATP2B2, ATP1B2, ATP2B1, CYP11B2, GNAS, PRKD2, CALM3, DAGLB, PLCB2, CREB5	1783	1.4003	1	0.282665	0.256371
hsa01522:Endocrine resistance	30	0.69541	0.044111	SHC4, NOTCH2, SHC3, SHC1, SRC, ARAF, PIK3CD, ADCY1, PIK3R1, ABCB11, EGFR, ADCY5, MAPK9, CCND1, AKT2, AKT3, E2F1, E2F2, PRKACA, PRKACB, IGF1, PTK2, ESR2, NCOR1, GNAS, MDM2, GRB2, RAF1, SOS1, HBEGF	1783	1.4003	1	0.282665	0.256371
hsa04915:Estrogen signaling pathway	40	0.927214	0.0443718	SHC4, ATF2, SHC3, SHC1, SRC, PIK3CD, ITPR2, TGFA, ITPR3, ADCY1, PIK3R1, KRT20, EGFR, GNAI2, ADCY5, AKT2, AKT3, CREB3L2, PRKACA, PRKACB, NCOA1, GABBR2, GABBR1, HSP90AA1, HSPA6, KRT13, KRT32, ESR2, GNAS, RARA, GRB2, CALM3, PGR, RAF1, FKBP4, SOS1, PLCB2, HBEGF, FKBP5, CREB5	1783	1.32589	1	0.282665	0.256371
hsa04923:Regulation of lipolysis in adipocytes	19	0.440427	0.0481902	INSR, PDE3B, IRS4, AQP7, PIK3CD, IRS2, ADCY1, PIK3R1, TSHR, ADCY5, GNAI2, AKT2, AKT3, GNAS, PLIN1, PRKACA, PRKACB, MGLL, PNPLA2	1783	1.552	1	0.301408	0.27337
hsa05032:Morphine addiction	28	0.64905	0.0492507	GABRB3, GABRB2, PDE3B, CACNA1B, ADCY1, GNAI2, ADCY5, GRK3, PDE11A, GNG7, PDE4B, GABRE, PDE8B, PRKACA, PRKACB, GABRA2, GABRP, GABBR2, GABBR1, SLC32A1, PRKCB, GABRA4, PDE2A, PRKCA, GNG12, PDE3A, GNAS, PDE7B	1783	1.40748	1	0.30254	0.274397
hsa05218:Melanoma	23	0.533148	0.0531255	PDGFRB, EGF, HGF, PDGFB, ARAF, PIK3CD, PIK3R1, IGF1, EGFR, GADD45G, CDK6, CCND1, CDH1, AKT2, PDGFD, AKT3, MDM2, E2F1, E2F2, BAK1, RAF1, MET, FGF23	1783	1.46124	1	0.314151	0.284927
hsa04014:Ras signaling pathway	63	1.46036	0.0541461	FLT1, RASGRF2, RASGRF1, PIK3CD, ETS1, ELK1, AKT2, AKT3, PRKACA, PRKACB, PDGFRB, RALGAPA1, PRKCB, HGF, PLA2G4A, PRKCA, TIAM1, RALGAPB, RASA1, RAF1, SOS1, MET, EXOC2, PLA1A, SHC4, RALA, RALB, SHC3, SHC1, PDGFB, PLA2G3, TGFA, RASAL1, PIK3R1, STK4, PLA2G6, RASGRP1, EGFR, RASGRP3, RAP1B, MAPK9, RAP1A, PDGFD, GNG7, ABL1, PLCG2, ABL2, FGF23, PAK2, PLA2G2F, NTRK2, EGF, INSR, IGF2, VEGFC, IGF1, GNG12, GRI…	1783	1.22631	1	0.314151	0.284927
hsa04142:Lysosome	38	0.880853	0.0548783	GBA, CLTC, AP4E1, LITAF, GNS, MFSD8, GGA2, CTSO, GGA3, AP1G2, LAMP1, CTSL, NEU1, SLC17A5, AP1S2, ATP6V0A2, AP1S1, ATP6V1H, IDS, AP4S1, WDR7, CTSE, CTSC, ATP6V0A1, CTSB, HGSNAT, CD164, MANBA, ATP6AP1, SORT1, M6PR, SUMF1, NPC1, PPT1, NCOA7, TPP1, ATP6V0C, SPAM1	1783	1.31685	1	0.314151	0.284927
hsa04152:AMPK signaling pathway	35	0.811312	0.0556485	PFKFB2, PRKAA1, PFKFB3, PRKAA2, IRS4, PRKAG2, PIK3CD, IRS2, PIK3R1, SLC2A4, ELAVL1, ADRA1A, RPTOR, EEF2K, PPP2R1B, CCND1, AKT2, AKT3, CREB3L2, LEPR, EIF4EBP1, CPT1A, PRKAB2, STRADA, PDPK1, INSR, TSC1, PPP2R5D, IGF1, TBC1D1, PPP2R2C, SCD, ULK1, PFKM, CREB5	1783	1.33417	1	0.314151	0.284927
hsa05222:Small cell lung cancer	28	0.64905	0.0557069	ITGB1, MAX, PIK3CD, LAMC1, PIK3R1, CCND1, AKT2, AKT3, E2F1, E2F2, BAK1, CDKN2B, APAF1, ITGA3, ITGA2, TRAF2, PTK2, GADD45G, CDK6, COL4A2, TRAF3, COL4A3, TRAF5, CDK2, COL4A6, RARB, BIRC2, BIRC3	1783	1.39218	1	0.314151	0.284927
hsa05211:Renal cell carcinoma	22	0.509968	0.0601365	EGLN1, ARNT2, TGFB2, EPAS1, HGF, PDGFB, ARAF, PIK3CD, TGFA, PIK3R1, ETS1, CRKL, RAP1B, RAP1A, AKT2, AKT3, GRB2, ELOB, RAF1, SOS1, PAK2, MET	1783	1.45848	1	0.33366	0.302622
hsa05215:Prostate cancer	29	0.67223	0.0627981	TCF7, PDGFB, ARAF, PIK3CD, TGFA, PIK3R1, EGFR, CCND1, AKT2, PDGFD, AKT3, CREB3L2, E2F1, E2F2, NKX3-1, PDGFRB, HSP90AA1, EGF, PDPK1, IGF1, AR, ZEB1, CDK2, MDM2, GRB2, ERG, RAF1, SOS1, CREB5	1783	1.36758	1	0.342898	0.311
hsa05166:Human T-cell leukemia virus 1 infection	59	1.36764	0.0713539	ATF2, NRP1, CD40, CRTC3, PIK3CD, CD3D, ETS1, ELK1, ELK4, CDC23, CCND2, KAT5, CCND1, AKT2, AKT3, CREB3L2, TSPO, HLA-DOA, PRKACA, JAK3, HLA-DOB, PRKACB, ANAPC7, IL1R1, HLA-A, TGFBR2, TNFRSF1A, KAT2B, KAT2A, ESPL1, VDAC1, TLN2, TLN1, SLC25A4, ANAPC1, CREB5, PIK3R1, ADCY1, ADCY5, MAPK9, TERT, E2F1, E2F2, HLA-DQA1, SMAD2, STAT5A, EGR1, STAT5B, TGFB2, CDKN2B, SMAD4, MAP3K1, SMAD3, NFYB, NFATC2, IL2RA, …	1783	1.2157	1	0.383527	0.34785
hsa00310:Lysine degradation	20	0.463607	0.0771926	GCDH, KMT2A, AADAT, SUV39H1, SETD7, PLOD3, PLOD2, PLOD1, ASH1L, DHTKD1, HYKK, MECOM, NSD1, EHHADH, PRDM16, NSD2, SMYD2, HADH, COLGALT1, EZH1	1783	1.45216	1	0.406224	0.368436
hsa04720:Long-term potentiation	21	0.486787	0.0779383	CAMK2D, PRKCB, CAMK2A, ARAF, ITPR2, PRKCA, ITPR3, ADCY1, GRIN1, GRIN2D, RAP1B, RPS6KA3, GRM5, RAP1A, RPS6KA2, CALM3, RAF1, PRKACA, PLCB2, PRKACB, RAPGEF3	1783	1.43374	1	0.406224	0.368436
hsa04931:Insulin resistance	31	0.718591	0.0857726	PRKAA1, PRKAA2, PRKAG2, PIK3CD, IRS2, PIK3R1, SLC2A4, PTPRF, PTPA, MAPK9, RPS6KA3, AKT2, RPS6KA2, AKT3, CREB3L2, PPARGC1B, MLXIP, PTPN1, CPT1A, PRKAB2, PRKCB, PDPK1, INSR, TNFRSF1A, TBC1D4, PPP1R3D, PRKCQ, PPARA, OGT, CREB5, SLC27A4	1783	1.313	1	0.434587	0.39416
hsa05163:Human cytomegalovirus infection	59	1.36764	0.0879746	ATF2, ITGB3, PIK3CD, ELK1, CX3CL1, CRKL, CASP8, CCND1, AKT2, AKT3, CREB3L2, PRKACA, PRKACB, PRKCB, IL1R1, TRAF2, PRKCA, TSC1, HLA-A, TNFRSF1A, TRAF5, RAF1, SOS1, PLCB2, CREB5, SRC, PTGER2, CXCR4, ITPR2, ITPR3, PIK3R1, ADCY1, EGFR, GNAI2, ADCY5, GNA11, GNG7, GNA12, CXCR2, EIF4EBP1, E2F1, PTK2B, E2F2, RIPK1, BAK1, IFNA21, IL10RB, IL10RA, NFATC2, GNG12, PTK2, CDK6, GNAS, MDM2, FAS, CALM3, GRB2, CALR…	1783	1.19949	1	0.434587	0.39416
hsa04929:GnRH secretion	20	0.463607	0.0882214	GABBR2, GABBR1, PRKCB, TRPC4, LHB, PIK3CD, ITPR2, CACNA1D, PRKCA, ITPR3, PIK3R1, ESR2, CACNA1I, GNA11, AKT2, AKT3, KISS1R, KCNN3, RAF1, PLCB2	1783	1.42947	1	0.434587	0.39416
hsa04540:Gap junction	26	0.602689	0.0884333	GUCY1B1, SRC, PDGFB, ITPR2, ITPR3, ADCY1, EGFR, GNAI2, ADCY5, GRM5, GNA11, PDGFD, PRKACA, PRKACB, PDGFRB, MAP3K2, GUCY1A1, PRKCB, EGF, PRKCA, TJP1, GNAS, GRB2, RAF1, SOS1, PLCB2	1783	1.3515	1	0.434587	0.39416
hsa04926:Relaxin signaling pathway	36	0.834492	0.089759	SHC4, ATF2, SHC3, SHC1, SRC, PIK3CD, ADCY1, PIK3R1, EGFR, GNAI2, ADCY5, MAPK9, EDNRB, AKT2, GNG7, AKT3, CREB3L2, NOS1, MAP2K7, PRKACA, PRKACB, SMAD2, VEGFC, PRKCA, GNG12, TGFBR2, COL1A1, COL4A2, COL4A3, COL4A6, GNAS, GRB2, RAF1, SOS1, PLCB2, CREB5	1783	1.27655	1	0.434889	0.394434
hsa04141:Protein processing in endoplasmic reticulum	46	1.0663	0.0928155	PRKN, SEC23A, PRKCSH, TUSC3, SAR1B, UBE2D2, DERL3, UBE2D3, DERL2, UBE2J1, SEC61A2, DNAJB2, LMAN1, MAPK9, GANAB, OS9, BAG1, UBQLN1, MAN1C1, BAK1, UGGT2, MAP2K7, SEC62, SEC23B, UGGT1, UBQLN4, SEC63, HSP90AA1, SEC24A, EIF2AK1, EDEM1, SSR3, HSPA6, EIF2AK3, TRAF2, UBE2G1, UBE4B, PDIA6, EIF2S1, CKAP4, DNAJC3, DNAJC5, DDIT3, HYOU1, CALR, RNF185	1783	1.23052	1	0.441482	0.400414
hsa04725:Cholinergic synapse	32	0.741771	0.0936866	CHRM2, ACHE, CAMK2D, CHRM1, CHRNA6, CAMK2A, CACNA1B, PIK3CD, ITPR2, CACNA1D, ITPR3, ADCY1, PIK3R1, GNAI2, ADCY5, GNA11, AKT2, GNG7, AKT3, CREB3L2, PRKACA, PRKACB, SLC18A3, CHRNB2, PRKCB, PRKCA, GNG12, KCNQ3, KCNQ4, KCNQ5, PLCB2, CREB5	1783	1.29538	1	0.441482	0.400414
hsa02010:ABC transporters	15	0.347705	0.0955582	ABCC3, ABCC4, ABCC2, ABCA5, ABCB7, ABCC5, ABCB5, ABCC9, ABCB8, ABCB11, ABCC12, ABCA10, ABCB10, ABCG4, ABCG1	1783	1.52477	1	0.444216	0.402894
hsa04713:Circadian entrainment	28	0.64905	0.0971228	CAMK2D, ADCYAP1R1, GUCY1B1, CAMK2A, CACNA1D, ITPR3, ADCY1, RYR3, GNAI2, ADCY5, CACNA1I, GNG7, NOS1, PRKACA, PRKACB, GRIA4, GUCY1A1, PRKCB, PRKCA, GNG12, GRIN1, GRIN2D, PER1, PER3, NOS1AP, GNAS, CALM3, PLCB2	1783	1.32042	1	0.44547	0.404031
